# Supplementary material for: Insights from full-text analyses of the Journal of the American Medical Association and the New England Journal of Medicine
Source: eLife. 2022 Jul 7;11:e72602. doi: 10.7554/eLife.72602 (PMC9262397; doi:10.7554/eLife.72602)
Supplement: Supplementary file 1. [file elife-72602-supp1.xlsx]

## Sheet: eTable_2_patent_JAMA
	1880-1889	1890-1899	1900-1909	1910-1919	1920-1929	1930-1939	1940-1949	1950-1959	1960-1969	1970-1979	1980-1989	1990-1999	2000-2009	2010-2019
1	proprietary	proprietary	proprietary	proprietary	trademark	histeen	arteriosus	ductus	ductus	ductus	ductus	ductus	coinventors	coinventors
2	fakish	venders	seeret	proprictary	proprietary	exploiter	ductus	arteriosus	arteriosus	arteriosus	arteriosus	arteriosus	coinventor	royalties
3	readymade	exploiter	proprictary	quack	exploiter	proprietary	ovale	coarctation	ovale	arteriosis	duetus	foramen	ovale	therapeutics
4	mostrums	putent	sceret	quackery	nurito	hard	proprietary	anomalous	arteriosis	bcv	arteriosis	databanks	foramen	biosimilar
5	polypharmaceutic	frandulent	mostrum	nostrum	citrophan	kolloyd	arteriosis	ovale	duetus	arteries	ovale	inventors	patents	coinventor
6	bootleggers	inventors	deception	seeret	patented	wheat	quackery	arteriosis	postductal	duetus	peritoneovenous	proprietary	biosimilar	extensions
7	proprie	proprie	exploiter	exploiters	distributer	trademark	duetus	tracheoesophageal	stenosis	grafts	bcv	defect	biosimilars	corevalve
8	fraudulence	rankest	faker	exploiter	benetol	distributer	medieines	interatrial	arteries	anastomotic	arteries	aortopulmonary	closure	sapien
9	abominations	unblushing	quack	venders	exploiters	nurito	stenosis	atresia	botallo	anastomosis	eustachian	deviees	ndas	equity
10	tised	seeret	proprietorship	fakers	purifico	exploiters	valves	tricuspid	bifurcating	coarctation	intraventricular	coinventor	nonexclusive	chimerix
11	hoodoo	quack	putent	nostrums	savrite	livermeal	botallo	truncus	aortopulmonary	aortofemoral	septostomy	venae	patentees	medtronics
12	tisements	sceret	nostrums	faker	histeen	sargon	endarteritis	septal	preductal	endarterectomized	occlusion	biotechnology	lvads	savient
13	inelegance	underhand	readymade	evil	trademarked	larabee	botalli	tetralogy	interatrial	saphenous	retroperfusion	coinventors	foreign	ductus
14	catspaw	dopers	frandulent	dopers	biofood	venders	guack	duetus	atriotomy	collateral	coarctation	theindustry	patentability	prana
15	pineoleum	patentee	dopers	frandulent	proprictary	vapex	fakish	botallo	truncus	ovale	interatrial	subvalvular	generic	patents
16	volubly	proprietorship	ecthical	sanatogen	cineraria	nostrum	airway	trilogy	atresia	revascularizing	truncus	ovale	blockbusters	orexigen
17	salicine	hoodoo	proprictaries	enteronol	veroform	benetol	tricuspid	stenosis	endarterectomized	femorofemoral	dilatation	funneled	cypher	inventors
18	dialin	eontrary	enteronol	commercinl	vinol	carvitin	valve	botalli	poststenotic	subeclavian	tricuspid	septation	pfo	sonexa
19	firwein	mostrum	tuberculozyne	fakes	fruitola	marmola	stipulations	subaortic	bicuspid	interatrial	anastomotic	ofcourse	bpca	generic
20	devices	guack	fraudulence	ethical	semisecret	polyglandol	infringing	subclavian	revascularizing	ventriculoperitoneal	valves	barda	pbms	foramen
21	sccret	magistral	citrophan	adulterators	fraudulence	citrophan	fallot	eisenmenger	cardiopneumonopexy	gastroepiploic	endarterectomized	exerimental	abbokinase	epigenomics
22	glantex	plantoxine	polypharmaceutic	fruitola	hydrocin	saurinol	saurinol	fibroelastosis	septal	mesocaval	auricle	duetus	patentable	covidien
23	vaunting	consumer	savrite	sceret	quack	biofood	urachus	aorticopulmonary	cavae	recanalized	thromboembolus	ncvia	patented	alnylam
24	purveyed	unethical	exploiters	labordine	venders	eksip	quack	foramen	foramen	arteriotomies	havit	paient	copyrights	licensed
25	anwesthetics	compounder	venders	stufl	polyglandol	lanteen	ghadiali	fallot	aneurysmal	vein	dilated	unsecured	premarket	biosimilars
26	tallic	readymade	fakish	fraudulence	nostrum	fakish	noninforming	bicuspid	pseudocoarctation	bifurcating	cavae	anomalous	uspto	anexon
27	fruitola	quackery	rankest	nurito	insoloid	savrite	patentee	preductal	vein	graft	ventriculoperitoneal	trileaflet	barda	arteriosus
28	vannay	shameless	plantoxine	specinlists	danderine	clearo	nurito	atrioventricularis	tricuspid	cineangiogram	tracheoesophageal	patentable	bayh	boehringeringelheim
29	bracers	savrite	hoodoo	hoodoo	pineoleum	insurol	tetralogy	transposition	unoccluded	vessel	saphenous	transposition	nonprofits	consultancy
30	nonintoxicating	mountebanks	nostrum	citrophan	capsules	metapollen	exploiter	postductal	cannulating	intracaval	aortopulmonary	arteriosis	exclusivity	hitech
31	guaiacum	faker	disgraceful	putent	umckaloabo	uninforming	sekov	vitelline	aorto	septostomy	subeclavian	supravalvular	aproval	rottapharm
32	copywriters	elaims	nutriola	fake	ucoline	fruitola	atresia	pseudotruncus	aorticopulmonary	axillofemoral	septal	ndas	avastin	biotechnology
33	indecencies	adulterators	unsalable	biofood	micajah	quackery	aortic	atrioseptopexy	artery	peritoneovenous	incompetence	luculent	reselling	vivus
34	toilet	seerecy	adulterators	proprictaries	patentee	proprictary	thytuitary	pentalogy	retroaortic	ultralightweight	bifurcating	disallow	monopolies	taimed
35	syntheties	drugs	fakers	fakish	calcerbs	bleached	septal	defect	subclavian	postductal	collateralization	copyrights	patentee	capricor
36	laparotomists	copyrighting	medieines	proprietaries	kolloyd	nyal	everrette	azygos	midcolic	fallot	revascularizing	patentability	trafficker	novacardia
37	hamostatic	exploiters	biofood	maritima	aspirin	curdolac	liposol	cavae	leftto	bicuspid	subclavian	reselling	toissue	aicuris
38	calcerbs	quacks	fruitola	frand	livermeal	antiopin	pure	subvalvular	cannulated	septal	venotomy	loopholes	extensions	accelerated
39	manufucturers	specinlists	shameless	rankest	cascarets	insoloid	suifapyridine	arteries	lusoria	umbilical	anastomosis	ivds	blockbuster	biosensors
40	introducers	pretences	labordine	tuberculozyne	frandulent	exicol	distributer	appendage	ventri	opacification	atresia	preclearance	commercialization	barda
41	manper	sccret	yadil	frauds	sargon	nacor	arteriovenous	vein	defect	noncalcific	mainstem	tomore	plavix	pharmaceutical
42	manufaeturers	brazen	copyrighting	humbug	adex	ironized	tubes	valvulotomies	thromboembolus	truncus	cineangiogram	septal	mccs	insulet
43	dopers	partners	habitina	peruna	giljan	fraudu	incompetence	perforator	dilated	closure	arteriovenous	restrictive	royalties	bpca
44	gripe	humbugging	sophisticators	quacks	hepatola	mizar	kolloyd	phonocatheter	aorta	hepatofugal	venae	tisements	dshea	amorcyte
45	baldheaded	crotte	cluims	oxydonor	clearo	reacceptance	medicinal	dextrocardia	atrioventricularis	subclavian	swanganz	antidiserimination	abilify	abbvie
46	unblushing	effrontery	bracers	cluims	hrand	semisecret	allimin	artery	interauricular	arterioplasty	toleft	preemption	scrip	trius
47	untruthfully	guackery	iridinol	plantoxine	radway	dionol	advertiscments	interauricular	epicardectomy	valvulotomies	septum	cushion	theindustry	nanosphere
48	vyet	citrophan	clearo	sartolin	advertiscments	bichloridol	diaplex	atrial	coarctation	aneurysmal	ventricles	concernsrelated	codx	codx
49	insomuch	proprictary	frands	habitina	calcylates	nutriola	coarctation	aorta	interarterial	teries	infarctrelated	microprocessors	agreements	novonordisk
50	quack	medieines	giljan	ecthical	kerasol	hydrocin	ergofortis	aneurysm	subpulmonary	bronchomediastinal	pseudotruncus	orits	currencies	precision
51	debauching	sham	unblushing	humbugging	styptysate	patented	metapollen	malformation	supravalvar	axillo	hepatofugal	patents	selfreferral	biocryst
52	imposters	mongers	patented	savrite	yadil	optolactin	glyoxylide	vena	reopacification	atresia	aorta	skeletonizing	markups	masimo
53	liquozone	unsalable	seerecy	giljan	odol	electrovita	deception	aortic	toright	toright	patency	statutorily	counterfeiting	sanofiaventis
54	oriphone	untrammelled	stufl	shameless	enteronol	flours	open	choanal	levocardia	thromboembolus	foramen	trdrp	infringing	geovax
55	asinine	speciously	patentee	impudent	electrovita	calcylates	patulin	brachiocephalic	collateral	hypogastric	mesocaval	nolonger	warranties	heartware
56	untrammelled	polypharmaceutic	proprie	semisecret	importer	ghadiali	artery	lutembacher	phonocatheter	portogram	grafts	steal	pending	valeant
57	rankly	abominations	cthical	sophisticators	firwein	fraudulence	luculent	cavas	venae	epicardectomy	descending	ileocecal	copyrighting	atherotech
58	guack	fraudulence	commercinl	medieines	proteogens	investisation	ecthical	levocardia	thyrocervical	septum	transposition	nonexclusive	corevalve	ivacaftor
59	ayds	sophisticators	nephritin	purifico	taurocol	sargol	sagrotan	interarterial	supraventricularis	infarctectomy	esophogram	nonmisleading	offlabel	medivation
60	ozomulsion	oxydonor	guack	dioradin	renesol	stroopal	touroff	polythene	depulsation	collateralized	outflow	illconceived	fdca	savacor
61	germex	proprictors	underhand	yadil	faker	faker	anli	omphalomesenteric	dextroposed	rebled	jugular	jettisoned	pharmacogenomic	ikaria
62	euthymol	proprictor	oxydonor	cineraria	inhalant	adex	closure	anastomotic	pseudotruncus	thyrocervical	recanalize	criminalizes	rotateq	incyte
63	patentmedicine	giljan	heilol	cascarets	felsol	mishranded	livermeal	endocardial	incompetence	leftto	aneurysmal	statism	proprietary	breakthrough
64	catholicon	osteopathists	oxcentric	antikamnia	esterol	ucoline	reacceptance	poststenotic	botalli	thromboembolectomy	appendage	closure	fdaaa	vytorin
65	biofood	osteopathy	proprietaries	adver	vapex	products	jiffy	cystic	venosus	subvalvular	closure	reccommending	multibillion	astellas
66	tobacconists	villainy	numes	calcerbs	duodenin	ergofortis	truncus	pyloromyotomy	bronchomediastinal	vessels	intracaval	anticommons	postapproval	zafgen
67	iridinol	sectarians	secret	readymade	fakish	pandiculator	cabasil	obstruction	atrioseptopexy	dilatation	botallo	pbms	sapien	relypsa
68	sheerest	dupes	hepatola	danderine	sterline	debarring	biofood	constrictive	endarteriectomy	atriotomy	postductal	pda	stipulations	biomarin
69	unscrupulously	fakers	unethical	mostrum	rexall	patentee	sulfathiasole	distal	vessel	collateralization	bicuspid	unpersuaded	dfars	amarin
70	preposterously	ljaw	specinlists	frands	nacor	dextri	nonaccepted	closure	septation	tricuspid	stenosis	interatrial	wirereas	actelion
71	mizar	wickedly	impudent	pineoleum	sagrotan	estemeter	proprictary	restenosis	cineangiogram	perforator	arteri	bruesewitz	preclearance	idenix
72	tisement	stultifies	magistral	medicinal	reacceptance	misbranded	oviducts	situs	solitus	cannulating	toright	procompetitive	nonbinding	dexcom
73	polyglandol	homeopathist	sccret	pharmacists	atomidine	purifico	consumer	arteriovenous	lymphaticovenous	cineangiocardiogram	echodensity	firewalls	unpatented	celgene
74	pusillanimous	biofood	eontrary	proprie	pfunder	giljan	absolutcly	fistula	omphalomesenteric	segmental	depulsation	reformulating	antikickback	lifesciences
75	lucre	veriest	frand	benetol	keraphen	advertiscments	interauricular	toright	vsd	preductal	cavagrams	miscon	cryptogenic	nutrisystem
76	pariogen	debauching	frauds	pharmaceutical	radithor	oritone	citrophan	septation	trileaflet	oversewn	iliac	blockbuster	aregulation	avastin
77	mostrum	fakirs	tisements	clnims	fougera	diamonex	hydrocin	atria	brachiocephalic	aortorenal	aortofemoral	abridges	ivds	celladon
78	flouted	transgressing	mailorder	tisements	chiris	aerosan	savrite	cardiopneumonopexy	vessels	ventriculojugular	collateralized	pirating	foia	personalis
79	scenting	pretentions	danderine	hymosa	spirocide	kelp	outlet	cava	coarcta	ttube	arfery	gossamer	governmentfunded	aterovax
80	unscrupulousness	adulterate	compounders	unblushing	gonosan	grayban	thermalaid	myxoma	subeclavian	cavernous	brachiocephalic	legalizes	regulatory	pharmaxis
81	kolloyd	impudent	puffery	trums	anusol	polypharmaceutic	venders	retrograde	cavas	narrowings	scv	scientificand	directto	accumetrics
82	grayban	huckster	patentmedicine	guack	nutriola	edam	nonproprictary	pseudocoarctation	cavagrams	stenosis	artery	enforceability	cybersecurity	anthera
83	suborned	empiries	gonosan	patented	sargol	trademarked	bicuspid	cardiopericardiopexy	aortic	veins	pateney	conraception	windfalls	carefusion
84	themall	voodooism	humbugging	druggists	vitalait	lukutate	preduct	collateral	pavf	poststenotic	cava	pseudotruncus	yetin	liposcience
85	mongers	fakish	dungerous	papine	cessna	cabasil	fraudulence	dextroposed	heterograft	distal	preshaped	nontherapeutic	crackdown	auspex
86	glanray	sheerest	contalned	tising	albutannin	misinformative	totaquine	urachus	transventricular	nonpatent	valved	adevice	tisements	gambro
87	giljan	faots	defrand	remedy	manufactured	donhide	vegesan	ebstein	transposition	swanganz	subvalvular	makesit	biotechnologies	catabasis
88	icines	untruths	mongers	numes	amylzyme	phosphated	subaortic	defects	retroperfusion	aortobifemoral	bypasses	impermissible	ncvia	defect
89	cnemies	mountebank	compounder	unsalable	vitavose	cystex	closed	veins	gastroepiploic	valved	ventri	foia	misstating	discovery
90	hardhearted	yadil	lnw	cthical	polypharmaceutic	kerasol	auricle	venae	veins	collaterals	tetralogy	biosimilars	safetyrelated	drug
91	leak	defrand	syntheties	viavi	mailorder	importer	investisation	atriums	arteriorrhaphy	tracheal	metering	relabel	prana	mannkind
92	empiries	ecthical	quacks	jireh	weightman	guack	warnink	closed	recanalized	venules	punctal	atemporary	icms	sunovion
93	puffery	pretender	inws	capudine	arteriosus	keraphen	eustachian	trilocular	cloaca	stump	leak	nonlicensed	tariffs	envivo
94	ecthical	proprictaries	iniquitous	hepatica	ironized	vibraphone	sargon	dilated	triatriatum	anulus	bagvalve	aceeptable	fsma	biogenics
95	sanaphos	vaunting	kolloyd	unethical	products	malt	estemeter	insufficiency	arterioplasty	stenosed	nonpatency	abusedeterrent	selfreferrals	aradigm
96	stonecutters	pretended	sanche	vender	aspironal	spintrate	trademarked	persistent	coarctations	midcolic	atriums	nonprofits	hitech	castlight
97	beneficence	oxcentric	proprictors	inws	curdolac	umckaloabo	ulticur	valves	collateralized	arterial	preocclusion	nonowners	ivacaftor	premarket
98	simpletons	contalned	advoeating	formamint	papine	cascarets	licensee	dextroposition	saphenous	arfery	rightand	roducts	device	novocure
99	incorruptible	sclling	sartolin	geheimmittel	optolactin	pariogen	semisecret	nonpatency	unopacified	arteriorrhaphy	portogram	enforeing	waivers	minimed
100	heilol	endorsers	cnemies	falsehoods	purveyed	yeast	ducts	popliteal	fistula	pulmonaryartery	gitation	antikickback	510k	thoratec
101	factured	frands	crotte	trademarked	plantoxine	firwein	the	vessel	ventriculojugular	tetralogy	fimbrial	criminalizing	globalization	achaogen
102	hawked	inws	eruel	neurilla	sartolin	renesol	devices	anastomosis	graft	cavae	ventriculojugular	deferential	amplatzer	flowco
103	eirculars	mostrums	vannay	deception	daytol	toxicide	copinol	biloculare	tunnelling	cardiopneumonopexy	septation	atria	savacor	salix
104	rankest	cnemies	cascarets	patentees	borcherdt	embrocation	mishranding	bronchomediastinal	obstruction	preocclusion	guidewire	ofbiological	pharmaceuticalindustry	cardiomems
105	fictitions	iniquitous	guackery	advertiscments	pariogen	urodonal	heilol	venosus	valvulotomies	foramen	ducti	sapien	subrogation	medpace
106	inventors	homeeopathists	disclosure	brazen	oxybon	fakery	adex	endomyocardial	esophagopleural	dilated	embolizing	premarket	importer	alere
107	sargon	preposterously	dupes	unscrupulousness	oxydonor	everrette	iodeikon	diverticulum	steal	phonocatheter	retrogradely	dfars	legalities	nonfinancial
108	bunglers	lucre	personation	gonosan	dopers	cresolene	aspirin	retroaortic	tracheoesophageal	epicardiectomy	cannulating	inventions	preapproval	medicure
109	rascally	vender	hydrocine	proprictors	ovale	iridinol	polypharmaceutic	unoccluded	aortofemoral	endothelialized	atria	proscribing	deselecting	eteplirsen
110	unblushingly	imposters	manufaeturers	polypharmaceutic	haelepron	hosept	carvitin	venous	portogram	postembolization	fallot	midcavity	anticommons	synergenz
111	freibank	monials	speciously	mnostrum	mnostrum	preduct	tonsol	incompetence	arfery	mainstem	axillofemoral	foreclosing	manufaeturers	intarcia
112	eventration	law	dioradin	sterline	trepol	creoco	pulmonary	trivalvular	implant	esophogram	dissecting	reseeding	drugeluting	ovale
113	plantoxine	patented	druggists	firwein	insurol	neutroids	giljan	coarctations	defects	femorotibial	malformation	disinformation	abusedeterrent	cytokinetics
114	lukutate	tisements	wbich	dupes	santyl	vitavose	copyrights	tetralogies	outflow	descending	solitus	insureds	23andme	biosciences
115	untruthfulness	coroners	elaims	histeen	marmola	pineoleum	virtual	septostomy	subvalvar	guidewire	embolized	nonyielding	vytorin	tethys
116	pattens	fruitola	linbility	cooperative	diamonex	licensor	tracheoesophageal	valvulotomy	valves	aortoplasty	endothelialized	postductal	ljaw	worldmeds
117	hasalways	puffery	fake	orangeine	eksip	styptysate	debarring	septum	intracaval	transposition	aleft	calcific	septal	medtronic
118	eontrary	mendacity	nurito	manufucturers	labordine	dectared	viridans	nonpatent	arteriosum	pseudoaneurysms	vessels	estheticians	rezulin	valeritas
119	needlessness	commercialists	nacor	nephritin	fakers	copinol	sterline	segmental	dextroposition	azygous	tendineae	analogized	chantix	resverlogix
120	gemrig	medicinal	sheerest	anedemin	vargol	castoria	donhide	stenosed	patency	jugular	anulus	andis	statutorily	regeneron
121	thÃ©m	jobber	manufucturers	elaims	neutroids	ercolin	medicineor	aortopulmonary	mesocaval	obstruction	angiocatheter	diseriminatory	repurposing	nycomed
122	huckster	bootleggers	cystex	sccret	seeqit	spirocide	telatuten	midcolic	azygous	opacify	infarctectomy	formany	roposed	cerexa
123	pharmacopceial	fangled	alleotone	patentmedicine	pandiculator	warnink	insoloid	sacciform	splenoportogram	sinogram	collateral	preempted	fcoi	zeneca
124	patentees	execrable	oblain	dioviburnia	nyal	swindles	hoodoo	infundibulectomy	rightand	anomalous	coarcta	franchising	shastra	caremark
125	inveigled	altempt	vender	advertised	dextri	danderine	lhowever	mesocaval	atria	ferrosilicone	cardiopneumonopexy	airliners	unpersuaded	macra
126	flaunted	drug	elnims	nutriola	tekarkin	aspirin	diamonex	sequestration	infundibulectomy	heterograft	pseudoaneurysms	genomics	rebates	cardiorentis
127	contalned	manufaeturers	geheimmittel	underhand	saurinol	sondergord	germex	commissurotomies	starredwards	leak	endocardial	codx	balkanization	anadys
128	chamberlens	cluims	clnimed	humbugs	virex	kruschen	nonpatency	pulmonary	opacify	recanalize	fibromuscular	nonapproval	thisinformation	halozyme
129	anli	avaricious	amolin	hepatola	sanatogen	kelpe	holmspray	refusion	trilocular	venotomy	traindicated	bioprostheses	medicineor	tibotec
130	sophisticators	colorable	oxygenor	ethics	uroluetic	proteogens	amertan	constriction	toleft	doublelumen	ttube	blockbusters	deferiprone	tobira
131	slends	humbug	sclling	insoloid	loeflund	medicinal	mnostrum	solitus	santorini	arteriographically	posteroseptal	endocardium	savient	corthera
132	vertised	professedly	stultifies	bracers	creoco	nostrums	mitral	valve	annuloplasty	cannulae	amnioscope	cybersecurity	biotechnology	diagnostics
133	stufl	sticklers	charlatanry	hydrocine	seeret	falschood	dextroposed	aneurysmal	dilatation	septation	aorticopulmonary	eminence	rottapharm	repurposing
134	luculent	practise	osteopathists	aguinst	oxcentric	tonic	anastomosis	leftto	retrocaval	supraclinoid	leftto	icms	preempted	valhealth
135	thesick	syntheties	knocker	empiries	borocaine	oxybon	pariogen	esophagopleural	preshaped	azygos	aortotomy	steerable	infringements	viiv
136	yadil	patentability	ihem	truth	nephritin	dopers	putent	noncrushing	prestenotic	cavas	perforator	overrode	yankelevitz	keryx
137	glutted	bracers	unscrupulousness	FALSE	cleero	labordine	foramen	esophogram	epicardiectomy	embolized	anomolous	mid1970s	referendums	orthomcneil
138	proprictaries	damnable	dishonest	clearo	stenon	subidin	pilonidal	eventration	biloculare	jugu	noncalcific	effectuation	assignee	benckiser
139	parading	stufl	migrainin	defrand	toxicide	diaplex	bichloridol	inversus	valve	cavagrams	palliation	atresia	bellwether	eyetech
140	highpriced	manufucturers	mailable	charlatanry	guack	device	aorta	reopacification	cilioretinal	declotting	vena	bartering	diplomacy	dainippon
141	unofficinal	witchery	clnims	specinlties	lifo	ecthical	eubetin	azygous	declotting	popliteal	anomaly	repurpose	ldts	device
142	putent	counterfeiting	calcerbs	mongers	galyl	quack	ottle	transventricular	anastomosis	cannulate	nonpatent	varc	flibanserin	piramal
143	mnostrum	quackish	users	disgraceful	nurosol	medieines	dopers	arteriorrhaphy	esophogram	depulsation	nasolacrimal	aboveboard	approvals	enteromedics
144	antisepticism	incorruptible	pyrenol	sheerest	sanche	fakes	suifanilamide	hypoplastic	opacifying	venacavogram	atriotomy	transferee	medtronics	xience
145	impostures	servility	unrighteous	oxcentric	castoria	tuberclecide	metabolin	retrohepatic	umbilico	tracheoesophageal	cineangiograms	triatriatum	avandia	tavi
146	compounder	nutriola	stills	compounders	tuberclecide	debarred	aforenamed	chylous	genicular	arteri	flowdirected	ivacaftor	jjurisdiction	pronova
147	adherence	numes	puffs	exploitation	remedy	medicines	fruitola	valvulotome	annulo	toleft	unoccluded	legislatively	aradigm	icms
148	extrapharmacopeial	knavery	medicines	ihem	ercolin	fakers	flouted	subpulmonary	azygos	lymphaticovenous	endocardium	renegotiated	nutraceuticals	reata
149	cheaters	grerman	ayds	swindling	zonite	postum	arteries	lusoria	arteriovenous	dilatated	femorofemoral	floodgates	defect	danone
150	speciously	foisting	insoloid	patentee	cystex	yadil	sophisticators	splenoportogram	tetralogy	revascularized	valvulotomies	cartel	nonapproval	cognis
151	donhide	oscilloclast	mishranding	tised	halz	wafers	ethical	bochdalek	mainstem	pavf	arterv	botallo	kratom	ucp
152	theie	fraudulency	tised	mailorder	slends	semolina	virex	circulation	ventricular	unclamping	opacify	compounder	nonimmigrant	exelixis
153	deceits	diabolical	iaws	medicineor	grayban	heilol	quicamphol	vasa	ducti	unoccluded	cannulate	rightand	wto	cardiome
154	iknow	palmist	kilmers	pharmacolosy	carsinol	sodiphene	lanteen	outflow	secundum	brachial	microtia	udn	renegotiated	pharmacogenomic
155	claptrap	crudest	firwein	alleotone	lukutate	radithor	raladam	opacification	septostomy	arcuate	reopacification	partially	attestations	natera
156	educts	unrighteous	pineoleum	debarthe	collosols	cineraria	lenigallol	supravalvar	aneurvsm	resutured	malpositioned	isbased	bnff	vifor
157	humbugging	animadverted	adver	medicines	septicide	peptono	peptono	ancurysmal	fallot	vena	rÃ©gur	vata	legislations	genentech
158	cardoseptic	mnostrum	semisecret	kolloyd	hoodoo	sagrotan	exicol	anomaly	aortoplasty	bucrylate	leafiet	valueadded	whistleblowers	angioblast
159	sham	charlatanry	inventors	fakirs	uninforming	asthmol	right	ductal	aortotomy	fistula	retrohepatic	biosimilar	bartered	biocardia
160	monopolist	cagliostro	mendacity	kilmers	kelpe	nut	optolactin	auricle	carotid	arteriovenous	phonocatheter	exclusivity	actof	lundbeck
161	defrand	prostituting	medicineor	sargol	carvitin	weldona	ayds	gastroepiploic	pericyst	aorta	aortobifemoral	thereisno	loophole	arbormetrix
162	wickedly	lawbreaking	bunco	prepuration	oritone	diabesan	histeen	ventriculojugular	arteriotomy	refluxing	ureterocele	nonenforcement	outsourcing	cardax
163	accedes	commoners	shac	cystex	maltine	hepatola	collateral	extrahepatic	aortobifemoral	midesophagus	cavas	ctas	palmy	allergan
164	unrighteous	unblushingly	mendacious	iniquitous	blueberry	sterline	inferior	endarteriectomy	stenosed	pateney	embolotherapy	bifurcating	spillovers	cypher
165	acetanilidum	pretenders	tising	dangerous	fraudu	naiodine	parenamine	stricture	trivalvular	lymphovenous	fixedrate	commercializing	nda	unitedhealthcare
166	vulnerable	charlatan	painodynes	peptomangan	trypsogen	thyogland	defrand	esophagotracheal	ventricie	closed	superselective	cflorts	pirating	bayerhealthcare
167	mountebanks	blackmailers	grayban	ayds	quackery	smaco	calcerbs	pyeloureteral	accessory	coarcta	septectomy	repurposing	laborsaving	adamas
168	discriminate	polyglandol	unwarrantably	dpharmacology	mizar	lukosine	cavae	grafts	occluded	tunnelling	sinoatrial	anomolous	franchises	patentability
169	backbiting	discountenance	vemedy	iridinol	humbug	sulfobetin	interarterial	annulus	cushion	neovascularity	cineventriculography	hdos	valeant	adlyfe
170	gonosan	disputes	freibank	zymotoid	hormotone	virex	uninforming	bifur	bifur	infarctrelated	malpositioning	medicineor	putent	inflarx
171	hahnemannism	catspaw	predatory	oxidaze	munyon	richartz	merchandising	ventricular	biatrial	heminephroureterectomy	chordae	cftr	gilenya	progenics
172	sajd	contumely	fangled	thiy	bisodol	nabona	esophagopleural	atrioventricular	arteriographically	patency	cavernous	amplatzer	apatients	palatin
173	lcading	tuberculozyne	vaunting	purgen	sodiphene	refistine	condol	perforators	subcoronary	septectomy	doublelumen	antidiscrimination	sonexa	siemens
174	adulterate	blackmailer	imposture	compuny	urcase	mailorder	aorticopulmonary	thromboembolus	transthoracically	ectasia	stump	publicinterest	disallow	cvrx
175	countenancing	elnims	oscilloclast	laxine	formamint	flour	dextri	nonparous	commissures	balioon	precerebral	prolife	counterfeit	amylin
176	glycozone	vended	zymotoid	commereial	embrocation	florazona	control	portogram	ventriculoperitoneal	occlud	cineangiocardiogram	patentees	undisclosed	prostrakan
177	servility	omnicura	altempt	proprietorship	capudine	calco	sartolin	venotomy	bcv	postphlebitic	transcervically	unscrupulousness	monopoly	teva
178	spiritous	volens	capudine	proprictor	stroopal	vinol	pandiculator	deferens	biscuspid	subelavian	hemodynamically	deregulated	nonexempt	axcan
179	essaying	secret	cnter	cnemies	putent	hrand	trademark	aberrant	opacification	airway	circumflexus	deregulate	procompetitive	denial
180	underhand	monopolizing	trums	hexamin	estemeter	koe	estrol	portocaval	anomalously	postnephrectomy	earotid	crackdown	adjudicatory	abbokinase
181	undersell	blandishments	falsehood	lnw	raladam	enteronol	inversus	postanastomotic	venotomy	bypasses	cathether	asbad	privatizing	pamlab
182	foisting	patentees	damnable	thut	beautifier	advertised	vibraphone	carotid	embolized	endocardium	ameroid	duplicity	crossref	exclusivity
183	nonlicensed	medicines	divections	liquozone	ecthical	cerelene	appendage	intrahepatic	descending	atrioseptopexy	exsanguination	arteriorrhaphy	neps	jannsen
184	itisin	ayds	enslaving	distributer	dionol	daytol	bronchiectasis	revascularizing	aortogram	lusoria	restrictive	abbokinase	severable	medavante
185	homeeopathists	wares	ethical	lactobacilline	metapollen	askins	left	supraventricularis	earotid	aorto	cinearteriography	inake	dissent	postapproval
186	witchery	humbuggery	sargol	sclling	readymade	slends	drugs	umbilical	coarcted	aorticopulmonary	pervenous	medicalis	effectuating	atcor
187	blenders	journeymen	fraudulency	anasarcin	mercol	dandruff	denial	ectopia	popliteal	reopacification	heminephroureterectomy	appendage	udn	kabi
188	liqguor	dowieites	aceused	heilol	ghadiali	haelepron	thyogland	basilar	annulus	retroperfusion	cavagram	breaching	covenants	debiopharm
189	mandragora	chamberlens	humbugs	swindles	ergoapiol	ambruster	insufficiency	tubal	mitral	embolizing	vappb	fallot	multipage	targacept
190	bristled	flouted	partienlar	taurocol	tricalcine	sorokowski	resyl	bifurcating	congenitally	polytetrafluoroethylene	azygous	structural	issuers	amplatzer
191	sargol	restrictive	cupidity	migrainin	quicamphol	mnostrum	dectared	innominate	rectovaginal	recatheterized	urachus	atrioseptopexy	orexigen	uspto
192	jobbers	heilol	manper	oblain	phosphated	remedy	allergosil	choledochal	eparterial	esophagopleural	pulmonaryartery	thisinformation	uncollectible	cilag
193	angsthetic	pretence	vequiring	castoria	izal	diffin	amylzyme	anomalously	occluding	reperfusion	fluoroscopie	lefts	reimportation	biosense
194	camouflaging	boodle	adulterate	vannay	digitalysatum	adver	tuberculosilicosis	proximal	valved	mesenteric	thyrocervical	deploys	groundswell	grifols
195	themgelves	cascarets	viavi	echitone	seydel	nurosol	patented	declotting	popliteals	autografts	biatrial	rightto	arbitrage	pacira
196	gripes	fradulent	drugs	septicide	calcreose	pfunder	oxybon	eparterial	shunt	crimped	anomalously	fdca	contravened	cybersecurity
197	guackery	icines	icines	vaunting	stufl	bottled	hrand	endarterectomized	aberrant	transthoracically	pulmonary	novacor	commercializing	varc
198	conmsider	dupe	mountebanks	lawyers	laxine	trepol	firwein	lienorenal	situs	cannulization	fibroelastosis	rebating	minimed	terumo
199	jabels	sectarianism	mostrums	oflicinl	prep	brinkler	septation	arteriosum	trilobed	cineventriculography	bundlebranch	dumbed	divulging	nuvera
200	andromachus	undefiled	catspaw	viciousness	pharmaceutical	lepso	xervac	endoaneurysmorrhaphy	septum	scv	thrombogenicity		royalty	cerenis
