# Supplementary material for: Insights from full-text analyses of the Journal of the American Medical Association and the New England Journal of Medicine
Source: eLife. 2022 Jul 7;11:e72602. doi: 10.7554/eLife.72602 (PMC9262397; doi:10.7554/eLife.72602)
Supplement: Supplementary file 2. [file elife-72602-supp2.xlsx]

## Sheet: patent
	1810-1819	1820-1829	1830-1839	1840-1849	1850-1859	1860-1869	1870-1879	1880-1889	1890-1899	1900-1909	1910-1919	1920-1929	1930-1939	1940-1949	1950-1959	1960-1969	1970-1979	1980-1989	1990-1999	2000-2009	2010-2019
1	contamination	mouih	nostrum	patentee	patentee	quack	quack	compounder	revalenta	proprietary	proprietary	ductus	arteriosus	ductus	ductus	ductus	ductus	ductus	arteriosus	foramen	ovale
2	thinness	shaken	hygeian	quack	compounder	patentee	revalenta	peddling	proprietary	quack	quack	arteriosus	ductus	arteriosus	arteriosus	arteriosus	arteriosus	arteriosus	ductus	ovale	foramen
3	arabs	vulva	venders	letheon	revalenta	proprietary	handling	revalenta	venders	revalenta	quackery	eommon	ovale	ovale	ovale	ovale	ovale	licensing	foramen	ductus	amplatzer
4	achilles	controlled	quack	nostrum	venders	revalenta	sophistications	affixing	wholesaler	eommon	magna	narroav	incompetence	transposition	tetralogy	foramen	saphenous	artery	ovale	coinventors	ductus
5	frenum	yeast	patentee	venders	quack	rummage	patentees	fouled	rummage	venders	core	arteriosas	arteriosas	septal	foramen	interatrial	arteries	cava	amplatzer	arteriosus	arteriosus
6	core	cuticura	brandreth	revalenta	patentees	compounder	display	baited	quack	blameworthy	thyroglossal	ovale	truncus	bicuspid	fallot	truncus	grafts	pda	occluder	amplatzer	device
7	taenia	expence	revalenta	hygeian	wholesaler	dentists	pattern	rummage	hawkers	rummage	cluster	papilla	tricuspid	coarctation	arteries	dextrocardia	foramen	equity	infarctrelated	inventors	corevalve
8	regulation	forest	papillary	compounder	nostrum	patentees	devices	vulcanized	compounder	leak	appendage	unsafe	septal	interauricular	truncus	stenosis	stenosis	ventriculoamniotic	starflex	coinventor	coinventors
9	matrix	assistants	letheon	thomsonism	unlawfully	denial	dentists	utensil	tÃºpelo	affixing	medicinal	tight	urachus	arteriosas	dilated	toleft	atresia	leftto	anomalous	patents	patents
10	swiss	garlic	cor	inventors	affixing	venders	mechanics	venders	vending	shellfish	dangerof	evil	valves	stenosis	interatrial	leftto	coarctation	amplatzer	venosus	pfo	coinventor
11	aura	pitch	heracleum	pharmaceutical	rummage	atomizing	instraments	stanchions	stuffing	stem	ductus	valves	uraehus	atresia	subclavian	outflow	vena	endarterectomized	endarterectomized	cryptogenic	pfo
12	unexplained	aluminous	drugsand	patentees	pretences	quackish	quackish	smuggled	smuggled	lading	false	cigarette	coarctation	arteriovenous	coarctation	supravalvular	aneurysmal	vena	pda	closure	closure
13	emergency	road	catholicon	handbill	peddling	device	patentee	wholesaler	earrying	dangerof	ampulla	obsolete	fallot	appendage	arteriosas	triatriatum	lsvc	dilated	aortopulmonary	apass	angioguard
14	atlas	8cc	nostrums	lobelia	jobber	unsafe	compounder	usiug	distilleries	halftruths	wuy	avhether	subclavian	valves	coarctations	tetralogy	leftto	toleft	arteriosas	angioguard	starflex
15	yaws	shaves	advertises	countenancing	puffs	choice	restorers	blacking	saleable	saleable	revalenta	partially	foramen	occlusion	endarterectomized	endarterectomized	cavagram	foramen	axillobifemoral	septal	appendage
16	bees	segalas	compounder	meddlers	vender	pocket	discountenancing	jobbers	prohibitory	sophistications	santorini	leak	coronarles	fallot	appendage	artery	venae	superior	toleft	picss	cryptogenic
17	parasitic	washing	nicotiana	inexpediency	drug	catholicon	stereotyped	devices	vilest	suoh	sophistications	pure	cava	anastomotic	septal	arteries	azygos	lsvc	endograft	pda	arteriovenous
18	gap	gap	drugs	rummage	affix	saino	hawkers	atomizing	affixing	meddlers	internal	unbreakable	valve	endarteritis	valves	tricuspid	toleft	collateral	vsds	infarctrelated	merci
19	cowpox	stem	vender	hydropathy	advertises	affixing	meddlers	stuffing	villainous	produet	eicatricial	spur	atresia	biloculare	preductal	fallot	pda	ovale	infrapopliteal	arteriosas	devices
20	corona	blast	countenancing	homaeopathic	pharmaceutist	scarificator	seals	vending	patentee	necessaiy	eommon	avonder	dextroposition	thrombotic	dilatation	coarctation	cavae	arteriosas	microcoil	interatrial	generics
21	anomalies	tinning	farriers	drugs	druggist	countenancing	ozonoscopes	nozzles	dutiable	anastomotic	retained	common	septum	aneurysmal	anastomotic	septal	cava	infarctrelated	microcatheter	cypher	actavis
22	pituitary	teakettle	gannal	homceopathic	hydropathist	display	construct	convoyed	lading	syphonage	cochlea	fakirs	aortie	aortitis	toleft	septum	ungrafted	cannulating	septostomy	starflex	subclavian
23	colitis	gene	vended	drugsand	unserupulous	cutlery	device	retorts	farmers	prohibitory	butthere	blurbs	botalli	dextroposition	atresia	preductal	artery	descending	interatrial	royalty	durata
24	cleansing	corpse	empirical	imported	exculpate	letheon	galen	saleable	milkmen	hawkers	restorers	duels	calcific	triloculare	incompetence	aortopulmonary	transposition	arteries	pericatheter	uspto	generic
25	progression	carpue	counterfeiting	provings	obsolete	assayers	proprietary	tool	jobbers	sanatogen	smuggled	inferior	subaortic	tetralogy	crossclamped	arteriosas	subclavian	patency	closure	saphenous	malformation
26	humoral	astragalus	retailing	deceivers	refusal	bagatelle	saleable	whitewash	sophistications	unserupulous	arteriosas	foramen	appendage	botalli	brachiocephalic	interauricular	aorta	saphenousvein	guidewire	toleft	leadless
27	religion	mangle	jovis	nicotiana	whosoever	bonnet	venders	cigar	consumer	smuggled	arteriosus	uose	vena	segmentary	septum	appendage	toright	axillobifemoral	patents	offlabel	bioresorbable
28	values	filtration	pharmaceutist	validity	maledictions	discountenancing	regulation	proprietary	stanchions	preseribing	vulnerable	doavn	arteries	coarctations	interauricular	occlusion	acyanotic	blalocktaussig	transvenously	exclusivity	paradoxical
29	misconception	oihers	masterwort	sophistications	infinitesimals	hawkers	collecting	palmed	obtaiu	wuy	ileal	ampulla	endarteritis	subclavian	dextrocardia	bicuspid	saphenousvein	vein	coinventors	brandname	vena
30	pore	usval	aster	maledictions	disinfectant	cundurango	japanese	consumer	manures	regurgitates	commereial	signal	arterioselerosis	cava	venae	fistula	anastomosis	dilatation	bioprosthesis	aneurysm	prescrib
31	seeking	thimbles	heurteloup	quackish	dishonestly	affix	deceivers	strainer	syphonage	discountenance	persistent	blameworthy	atherosclerotic	tricuspid	dextroposition	venosus	fistula	femorofemoral	guidewires	corevalve	pacemaker
32	capsules	anatomized	tabacum	villainous	hygeian	instraments	wdiile	hawkers	caskets	materials	bladeler	uraehus	tendineae	saphenous	atherosclerotic	myxoma	collateral	interatrial	blalocktaussig	royalties	xience
33	reinforcement	smoke	adver	discountenancing	allopathist	penally	weapon	sophistications	retailing	awav	sufferance	venders	auricle	collateral	ostia	thrombendarterectomy	endarterectomized	arterioportal	leftto	generics	maze
34	disproportion	poaverful	provings	anieles	assayers	meddlers	sots	tunnel	medicinÃ¡is	unguided	effectus	boavel	typhlitis	truncus	coarcted	brachiocephalic	thrombendarterectomy	marginal	aneurysm	actavis	valves
35	playing	perinzeum	thomsonian	card	deceivers	quackery	pharmacists	spiritous	jobber	lithodeon	venders	tricuspid	stenosis	cavernous	aneurysmally	atresia	vein	grafis	trademark	venosus	cava
36	anomaly	wall	jobber	palming	letheon	card	rummage	knapsacks	disinfector	spittoon	barrier	syphonage	myocarditis	omphalomesenteric	aorta	coronary	anastomotic	venae	multiplane	infringing	pliva
37	generalized	shells	justitia	hydropathists	catholicon	pharmaceutist	refractory	lithotrites	storekeepers	eilher	theduodenum	effectus	tetralogy	closure	artery	subclavian	vessels	popliteal	ventriculoamniotic	septostomy	covidien
38	blast	loiter	abyssinian	barefaced	provings	handbill	bind	wallpaper	nostrum	cribbing	cribbing	proprietary	congenitally	vena	azygos	cineangiocardiography	bicuspid	stenosis	angioguard	infarct	licensing
39	weapon	flies	naine	deception	deception	sophistications	farmers	retailed	unlawfully	fooel	carolene	crannies	infaret	pyloric	commissures	outlet	truncus	infrapopliteal	perforator	arteriovenous	electric
40	tonsil	magnetizing	salmon	disabilities	weapon	hygeian	intervention	contraband	spiritous	restorers	diffieulty	coronarles	oddi	fenestration	ligamentum	aneurysmal	arteriotomies	anastomosis	corevalve	cordis	rems
41	dent	bonnet	mountebank	humbug	inexpediency	policy	helping	retailing	electrics	consumer	narcotic	duets	atherosclerosis	cor	atrioventricularis	toright	arteriovenous	occlusion	pfo	licensee	fdama
42	asparagus	battery	brocchieri	clergy	compositors	hydropathist	assayers	caskets	leak	makeshifts	sanatogen	isnot	mitral	chordae	anomalous	arteriovenous	cannulating	grafts	thromboembolectomy	trademark	pulmonx
43	disgust	sideboard	bond	abyssinian	parasite	metal	guardians	strainers	meddlers	commereial	squirting	toavards	subacute	transventricular	vena	transposition	basilar	uninflated	umbrella	atrial	premarket
44	image	cheerily	homaeopathic	homceopathy	compositor	wholesaler	traps	spittoon	unserupulous	dutiable	autotoxemia	valve	bacterial	tracheoesophageal	leftto	obstruction	trifurcation	mesocaval	vsd	clamshell	inventors
45	solving	wool	principios	plundering	pattern	schuft	reservoir	vilest	peddling	probangs	rummage	resectionists	artery	constrictive	vessels	vessel	hemothorax	obstruction	predilation	shareholder	amarin
46	motor	pocket	swindler	secresy	hawkers	farriers	fastidiousness	speculums	hucksters	jilease	syphonage	terminals	cavae	atherosclerotic	closed	avtery	vsds	hepatofugal	noncompressible	licensing	septostomy
47	testing	cupper	assayers	inappropriate	homoeopaths	anieles	crowds	hauling	fouled	avonder	implant	overlap	rÃ©gurgita	vesicovaginal	saphenous	atrioventricularis	descending	hypogastric	coarctations	drug	sapien
48	papaver	unfastened	lobelia	oiher	vending	shallbe	whichthey	quackish	greediness	unmutilated	vater	othei	thebesian	subpulmonary	cavae	lsvc	cineangiocardiography	opacification	coinventor	ventricle	webmd
49	menorrhagia	yvhich	kousso	infinitesimals	preseribe	dishonestly	conformity	graefenberg	givethe	rot	blameworthy	halftruths	triloculare	arteriosum	subaortic	subpulmonary	graft	fistula	subclavian	xience	occluder
50	pattern	convoyed	poisoners	gulling	mountebank	provings	fumigation	toilet	seals	wastepaper	poisonous	dirge	chordae	coronarles	arteriotomies	triloculare	aortopulmonary	truncus	device	infringement	collateral
51	aptitude	barrier	inventors	affixing	licensed	utensil	retorts	unbreakable	spittoons	wholesaler	lactiferous	rough	rÃ©gurgi	ballvalve	fistula	infundibular	ostia	closure	intraprocedural	copyrights	apass
52	dorsalis	bird	ruspini	jovis	discountenance	homceopathist	externals	farcical	jubt	iiave	makeshifts	aneurysmal	arterioselerotic	ostia	tracheoesophageal	subvalvular	infrapopliteal	mainstem	bifurcated	cardioembolism	cypher
53	validity	foreing	dispenses	masterwort	preference	homaeopathic	provings	tarred	retailed	boavel	direetions	hawkers	dealingwith	atrioventricularis	bridging	dextroposition	venacava	toright	occlusion	coarctation	resmed
54	thrive	lecches	pomade	steal	secresy	maledictions	obsolete	scoops	usiug	outlet	produects	eicatricial	bicuspid	endophlebitis	tricuspid	vessels	brachiocephalic	bypassed	licensing	occluder	picss
55	hostility	immersion	anieles	mountebank	lessee	barefaced	affixing	spoons	utensil	jejunal	evil	flaps	reflux	pericardium	triloculare	aortic	hepatofugal	axillofemoral	femorofemoral	merci	interatrial
56	lichens	eatirely	ethics	compositor	villainous	inert	rescue	lading	quackish	sucking	loose	revalenta	endocardium	arteries	splenoportogram	cushion	segmental	bronchi	angioscope	thoratec	cor
57	metacarpal	istaken	peddling	hydropathist	farriers	nostrum	sport	locomotives	restorers	sidetrack	mesocolon	jet	proprietary	fistula	collateral	cavae	tricuspid	cavagram	infrarenal	positioner	implant
58	licensed	acupuncturation	hawkers	inven	hereunto	loiter	stable	upholstered	discountenance	unembalmed	jobbers	shadoav	interauricular	esophagogastrostomy	occlusion	collateral	venosus	recanalized	rashkind	unpatentable	biopharmaceuticals
59	teaching	fonnd	preventive	drug	remonstrate	dutiable	shallbe	disinfector	graefenberg	cultist	duels	avrong	anomalous	situ	biloculare	rightto	tetralogy	subclavian	clamshell	extensions	brandname
60	buds	syringe	trillium	brandreth	discountenancing	mountebank	utilization	probangs	lurge	segregator	adherence	elastic	venae	vessel	autografts	biloculare	intrahepatic	collaterals	popliteal	plavix	solitaire
61	tract	patieni	propylamin	mesmerism	arrant	laboratory	atomizing	quack	patentees	stypticin	diserimination	incompetence	valsalva	artery	opacification	dilated	dilated	vessels	internalcarotid	ventriculoseptal	everolimuseluting
62	valsalva	digester	pocket	farriers	distillers	grog	mouldings	medicinÃ¡is	spouting	dealingwith	pouches	meddlers	congenital	wirsung	annulus	coarctations	vessel	rightto	intraventricular	leftto	therapeutics
63	segment	openingof	pretences	homaeopathy	palming	oihers	physitians	muslins	palmed	exonerates	endangered	drugs	aneurysmal	foramen	subpulmonary	extrahepatic	valves	iliac	apass	genericdrug	septal
64	azygos	pan	restell	quackeries	knave	libellous	stigma	cookers	traps	lithotrites	turgescent	sterilize	eommon	septum	defect	valves	inferior	venacavographic	polytetrafluoroethylene	toright	maceuticals
65	zone	feeding	gulling	simpleton	meddlers	discountenance	unmutilated	milkmen	defile	butchering	mushroom	gasket	defects	duct	transatrial	arteriotomies	opacification	umbilical	infrainguinal	cavae	lifesciences
66	abrasion	raked	meddlers	vervain	brandreth	petticoats	adaptation	rioters	convoyed	ovale	produets	palmed	extrahepatic	subacute	vein	venae	atrioventricularis	stenosed	septal	rightto	accumetrics
67	hippocratic	flu	drug	thomsonian	countenancing	flies	aqueduct	wallpapers	currying	preventthe	cardia	arery	paradoxical	dissecting	lsvc	inferior	axillobifemoral	saphenous	cavagram	pharmaceutical	heartware
68	attrition	nipples	aslley	homoeopathist	impliedly	weapon	illuminant	merchandize	teakettle	asthey	drugs	antral	annuli	tendineae	hepatofugal	defect	nonocclusive	ucimc	transseptal	warss	proprietary
69	rocky	parings	emmenagogue	counterfeiting	aspersion	opcrandi	givethe	patentee	oaten	thebest	posedly	they7	subpulmonary	aneurysmally	hepatopetal	vein	valvar	inferior	collateral	intima	patentability
70	music	lachesis	rummage	anceps	violator	palming	discountenance	scents	draiuage	patentees	electromagnet	nasofrontal	aorta	valve	arterioles	trilogy	coarctations	device	thromboembolus	preempts	retriever
71	expectorate	inio	tobacco	unblushing	bottle	stable	jugglers	wastepaper	knavery	givethe	iliostomy	osteum	tricuspidvalve	bundlebranch	venosus	distal	aortofemoral	hepatopetal	coarctation	rashkind	wingspan
72	focal	whale	self	homoeopath	homoeopath	pharmaceutists	licensed	licensing	osteopathy	jobbers	violative	avhieh	plicating	intrahepatic	myxoma	conus	varicose	occluder	pseudoaneurysm	aorta	transapical
73	supernumerary	slider	ridiculing	pretences	retailing	malpractice	indecently	competency	discountenancing	imprisoning	morals	wastepaper	duect	endarterectomized	graft	hepatofugal	situs	ducts	reopening	vena	medtronics
74	theca	stumps	hÃ¨	dishonestly	empirical	infinitesimals	formularized	rifled	theleast	urachus	products	closure	aortic	thromboembolism	gastroepiploic	vena	hypogastric	ureter	axillofemoral	preempted	dexcom
75	quack	inhalation	sydenhain	homeeopathic	inventors	homoeopathist	agricultural	drapery	merchandize	fastidiousness	disorganized	duect	thrombotic	spur	cannulating	ballvalve	hepaticartery	atriotomy	acardiac	retrievers	trevo
76	ape	moulh	unblushing	opcrandi	plundering	gilding	deprivation	smoke	nozzles	cholagogues	omphalomesenteric	submucous	anastomotic	mitral	cava	ostium	blalocktaussig	veins	flail	sapphire	biosimilar
77	stain	bind	cutlery	justitia	cutlers	police	block	sluice	uncorked	sufferance	urogenital	urachus	coronary	intraventricular	internalcarotid	commissures	radarkymography	thromboembolus	pulmonaryvein	ptfe	fdasia
78	capitis	valsalva	homaeopathy	hawkers	jewellers	beneficence	stem	guaged	tool	spiritous	transposition	unserupulous	mÃ¶nckeberg	esophagobronchial	botalli	ivalon	avtery	carotid	ptfe	preemption	biocryst
79	wilderness	velpcau	vervain	basto	remonstrating	untler	countenancing	repellant	jugglers	cigarette	partieular	tympanic	hyperpiesia	ileal	toright	dilatation	iliac	ratesetting	sems	blalocktaussig	xyrem
80	accessory	trestle	thompsonian	abettors	unrighteous	bazar	beautifying	hucksters	grog	inappropriate	neurogenic	phimosis	cannulating	annulus	inferior	thromboembolus	fallot	constriction	introducer	nitromed	cempra
81	chilblains	ewing	vend	vender	loiter	sepulture	ostentatiously	silken	hushing	arteriosas	distal	beliea	venosus	venacava	bochdalek	botalli	closure	bypassing	venotomy	epc	cordis
82	verbal	putin	tise	device	denounces	authorised	fascinations	traitors	shopkeepers	discountenancing	incompetence	vending	interatrial	horseshoe	superior	hepaticartery	reanastomosed	collecting	wallstent	endograft	abiomed
83	caesarian	sleel	preference	malpractice	homceopathist	humbuggery	untler	unwrapped	designedly	tonies	awaywith	santorini	annulus	tracheal	bicuspid	arterial	hepatopetal	opacifying	echodensities	perimembranous	fdaaa
84	block	fields	handbill	censuring	swears	swindling	pathies	augean	atomizing	milkmen	invaginatcd	bilk	hydrothorax	coronary	uraehus	vsds	vertebrobasilar	right	takeoff	inventions	plavix
85	saccharum	ihrough	deleau	propylamin	authorised	wool	pharmaceutists	tomahawk	preseribing	users	graefenberg	rectovaginal	arhythmia	mesenteric	fibroclastosis	anastomotic	arterioportal	hydronephrosis	rightto	vertebrobasilar	omron
86	rescue	metal	amulet	peddling	cutlery	barrier	pool	validity	sluice	unsalable	virtual	greatdeal	preductal	jejunal	cavernous	ebstein	aneurysmally	gastroepiploic	steal	bayh	legal
87	pick	acupuncture	thomsonism	scurrility	knavery	disinterment	adjustment	unsealed	locomotives	ahvays	falso	seeped	pyelitis	valsalva	iliac	valve	appendage	hepaticartery	valvar	banco	23andme
88	fabricius	sackcloth	cubeba	assayers	unhallowed	dessault	design	traps	malpraxis	entangle	magnum	vater	ballvalve	volvulus	congenitally	anomalous	subpulmonary	internalthoracic	superselective	momenta	retrievers
89	retrograde	pomegranate	plundering	indelicacy	homÅ“opathist	unrighteous	consumer	dutiable	daintily	formularized	cerumen	any7	anthracosis	infarctions	coronary	aorta	arteriosas	reopening	infraclinoid	urachus	offlabel
90	scalded	canine	homeeopathic	knavery	bond	cleansing	scurrility	cupboard	retorts	counterfeited	incarceration	cardia	conus	ureteral	papilla	cava	ventriculoamniotic	arteriotomies	malformation	transvenously	hospira
91	connecting	heurteloup	patentees	posology	morton	smuggle	entangle	currying	distillery	entangles	againstthe	tear	endarterectomized	preductal	avtery	poststenotic	collateralization	starflex	lsvc	ventriculoamniotic	antiplatelets
92	stable	jet	segalas	vaunt	jugglers	prospective	avast	fumigate	palming	quackish	partially	outlet	endocarditis	ligamentum	femoral	iliac	aortograms	tibioperoneal	bailout	cardioverterdefibrillator	thoratec
93	crops	aerial	insurance	panegyric	wares	sextons	vilest	muzzles	iuserted	resectionists	submucously	fecolith	pyloric	pericardial	thrombosed	crossclamped	aorticarch	ventricles	bjorkshiley	unmarketed	tricuspid
94	coiled	pursuers	pruriens	duelling	stereotyped	retorts	capital	atomizers	idled	augean	prohibitory	cystie	anomaly	tamponade	pulmonaryvalve	splenoportogram	portocaval	mesenteric	anomaly	device	mynx
95	ecchymosis	attitudes	particeps	denial	feloniously	gift	silks	spittoons	fumigate	proteet	inmind	boutonniÃ¨re	thebesius	pulmonaryvalve	arteriosum	arterioportal	crossclamped	mammaryartery	brachiocephalic	coarctations	aneurysm
96	reform	pool	adulterating	behavior	adjuster	artifice	vault	powdering	anciently	produets	boutonniÃ¨re	restorers	thrombophlebitis	commissures	omphalomesenteric	hypogastric	venacavagraphic	jugular	annuli	paracorporeal	defect
97	mitis	divido	chlorodyne	homÅ“opathist	vaunt	toilet	anieles	scrawls	incombustible	inmind	spiritous	ahvays	reptiles	thromboangiitis	arcuate	pulmonaryvalve	infarctrelated	fallot	endothelialized	coalition	mining
98	mad	paining	guaiacum	violator	bundle	peddling	poles	villainous	themin	devices	sphincter	turgescent	ovule	endocardium	transposition	presinusoidal	ctga	coarctations	intraatrial	nonexclusive	reata
99	therapeutic	vault	vernix	remonstrating	demurrer	selection	manures	hydrant	stings	perfumery	vesicÅ“	vibrators	saphenous	obliterans	vessel	venacavagram	unthrombosed	venacava	stentgraft	appendage	ptfe
100	mirror	china	helvetius	cognomen	molest	guardians	villainous	pulverizing	manufacturo	offood	misbranded	wthich	popliteal	arteriectomy	arterioportal	annuli	vsd	cavae	stented	islation	cepheid
101	narration	sayingthat	arago	cundurango	barefaced	witnesses	themin	lurge	uaed	upholders	wolffian	knoavs	hepatic	cholecystitis	venules	cubital	septectomy	ventricle	calfvein	endarterectomized	momenta
102	trench	ramrod	stagner	amulet	card	inexpediency	compositors	spoils	wuy	theyshould	andalso	cracked	vasography	aortie	ballvalve	cavagram	popliteal	aortocoronary	placental	everolimuseluting	nanosphere
103	immobility	pulp	apparatus	russian	infringing	adaptation	theordinary	tlioy	gnaw	storekeepers	functionated	regurgitates	ureterorectal	endocardial	aberrant	valvar	mesenteric	bucrylate	redilation	cardioembolic	penumbra
104	polydipsia	feathers	signal	thompsonianism	knoweth	violator	sepulture	leathern	musquito	proprietaries	newand	conscienceless	bronehopneumonia	flutter	endarteritis	ventriculoamniotic	revascularized	swanganz	arteriotomies	preductal	biosense
105	controlled	avarm	oiher	preventive	sophistications	remonstrating	ibey	shotguns	hydrant	buthe	upholders	unprogressive	regurgita	ducts	conus	aqueduct	recanalized	projection	arteriovenous	paclitaxeleluting	intellectual
106	fossa	cushions	valua	nod	sentinel	extorting	trenching	sodom	fastidiousness	evon	damming	sidetrack	sorta	auricle	endocardium	ostia	occlusion	unilateral	licensee	infringed	pharmaceutical
107	sucking	foret	geranium	mesmerists	laboratory	merchandize	gulling	palming	arrant	bartered	inveighed	wornout	cholecystoduodenal	esophageal	segmental	subaortic	subvalvular	stricture	steerable	sammpris	prosthesis
108	strains	junks	lithontriptic	alpha	untler	design	whitewashing	catholicon	principio	holsteins	emerging	chiropractie	biloculare	endoaneurysmorrhaphy	atrial	eustachian	dehiscence	aneurysmally	nonferromagnetic	polytetrafluoroethylene	jerini
109	nymph	ilaving	foisting	jugglery	jobbers	deceivers	spouting	bartered	pedlars	unbreakable	halftruths	unguided	polycystic	torsion	rectovaginal	hepaticvein	perimembranous	femoropopliteal	unpatentable	connecting	royalties
110	innate	whichin	vending	humbuggery	scurrility	thonght	theleast	tÃºpelo	unsalable	lighl	rackets	verydifficult	achalasia	venosus	recatheterization	svc	polysplenia	guidewires	singlevessel	fdama	bioabsorbable
111	perennial	niÃ±a	homÅ“opathist	pathies	equipage	arlicle	seeds	contaminated	unbreakable	similars	externals	someavhat	arteritis	choleeystectomy	unoccluded	aneurysmally	anomalous	brachiocephalic	aorticarch	rems	veridex
112	astronomy	carbuncle	homceopathic	allopathist	quackish	bottle	defile	produet	cribbing	empty	produetion	burettes	circulus	papilla	grafts	superior	thromboembolectomy	cannulations	anastomosis	microcoil	lvads
113	aponeurosis	disabled	virginiana	laboratory	homoeopathist	hygrodeik	jealousy	givethe	confectioners	direetions	shotted	impaction	chronic	stump	sacs	transatrial	nongrafted	vsds	uninflated	wingspan	mitraclip
114	commissures	liini	chrestien	mesmerizer	identification	devices	pedlars	bagatelle	faker	fungosities	preventthe	outflow	parhologic	nonsuture	infrapopliteal	endocardial	interauricular	overinflated	aortorenal	mynx	clamshell
115	nuts	gallipot	battley	brocchieri	condescended	syringe	host	japanned	preveut	strainers	avidely	straddled	tortuosities	stricture	mesenteric	thyrocervical	vesse	ohip	paravalvular	penumbra	allergan
116	crop	banged	unlawfully	authorised	ungentlemanly	plundering	rejection	meddlers	auimal	uamely	pylorica	diserimination	cavernous	umbilical	fused	gastroesophageal	outlet	coronarybypass	intraoperatively	microbia	synarc
117	network	bland	deceivers	hitn	oihers	givethe	tool	offensively	abuso	bladeler	ligamentary	aavay	interadherence	sorta	thrombendarterectomy	incompetence	dilatation	duct	carotidartery	uninflated	achillion
118	pensionnaires	ricinus	shekels	eupatorium	guilt	pan	adaptedness	pewter	sanitarily	manures	bugbears	congenitally	rectovaginal	superiorvena	arteriovenous	ventricle	embolism	thoracicartery	radialartery	bankrolling	ims
119	alliance	pipe	marilandica	preference	petticoats	molest	choice	disguising	sackcloth	villainous	wdiatever	digital	partially	cholecystgastrostomy	bronchi	embolized	anomaly	vessel	trifurcation	prescrib	uspto
120	nevi	major	murray	pattern	navigation	robiquet	barbarities	silvering	deceivers	eddyism	taxis	verywell	intraventricular	interadherence	impacted	pulmonary	septal	usfmss	mammaryartery	vicuron	pacemakers
121	molar	rasped	styling	arrant	participation	unlawfully	scoundrels	unfastened	drugsand	iliostomy	greatdeal	reflux	vitelline	reflux	mesentery	proximal	endocardial	ungrafted	actavis	dtca	arteriosas
122	individuality	turnkey	pharmacien	remonstrate	propricty	scurrility	donor	comb	drippings	useel	medicinÃ¡is	cleancut	stripper	embolizing	stenosed	fibroclastosis	opacifying	extrahepatic	coaxial	septum	fidelis
123	degeneration	bebind	shoultl	instraments	famous	mesmerists	andtheir	upholstery	opeu	glÃ©nard	exenterated	users	vessels	cholelithiasis	recanalized	postsinusoidal	veins	thrombectomies	semirigid	biobanks	alnylam
124	guidance	tottered	dulcis	expostulation	bribe	kerosolene	scats	sucking	iutroduced	powerof	glutoid	dealingwith	transposition	arterioles	infrahepatic	intrahepatic	postinfarction	basilar	reperfuse	heartware	right
125	laughter	spiral	proprietaries	homeopathic	complainant	stigma	reserve	extemporized	excommunication	avhether	otherthan	sunbaths	reconnection	eisenmenger	valve	aorticarch	poplitcal	takeoff	rvpa	leadless	minimed
126	esturro	resuscitation	medendi	aspersion	knavish	abyssinian	obtaiu	corks	putrifying	contenÃ­	uraehus	facetted	gurgitation	bland	wirsung	internalcarotid	arteri	internalmammary	cannulating	fistula	disputes
127	rage	samÃ©	proprietor	impliedly	vilest	censuring	molest	imprisoning	lessee	benevolence	turbinates	insufficience	lsvc	anomaly	malformation	infrahepatic	pneumopericardium	valves	hepatopetal	patentability	agendia
128	pharmaceutical	rot	arrant	naine	assayer	thomsonism	fairness	mangle	grates	incombustible	theywere	stuffing	fibrosus	coarcted	gralts	transventricular	aneurysm	ventriculoperitoneal	dtca	ncvia	transcranial
129	esophagus	crusher	selection	stain	hostility	counterfeiting	woolens	unscrew	physitians	stuffing	fourfifths	lactiferous	autonephrectomy	azygos	pylorus	ventricles	antegrade	trifurcation	rheolytic	cerebral	fistula
130	nursing	construct	embezzlement	catholicon	pleadings	procedures	homceopathically	wrappings	itsolf	retailing	nareotic	latches	perimembranous	nephrosclerosis	unthrombosed	mitral	hemiazygos	licensee	stentless	marketer	partnered
131	applicants	datura	gilding	mesmerist	quoth	pleadings	hydropathists	stowed	perfumery	discountenanced	fouling	disinfectant	situs	ampulla	adventitia	splenoportography	annulus	ductal	picss	daubert	guidewire
132	enteritis	shopman	cundurango	artifice	herbalist	panic	thonght	luggage	unpunished	racketeers	reality	unwrapped	arteriosclerosis	pattrolocical	popliteal	anastomosis	splenoportogram	thyrocervical	splenoportal	breaching	retrograde
133	geography	ditain	ike	shoultl	datura	divorce	conflict	pedlars	edibles	impliedly	maxillare	septal	gitation	congenital	reanastomosed	cannulating	preductal	unpatentable	paracorporeal	sems	vicuron
134	gifted	lupulia	evon	hydra	gilding	whosoever	tinsel	demolishing	cachÃ©	retained	vaecination	recontraction	insufficiency	extrahepatic	vsds	closure	venacavagram	cannulated	vena	subclavian	competitive
135	barrier	usos	remedics	retailing	sextons	slating	foulest	trenching	consignee	Å“sophageal	broughtabout	vthe	phlebosclerosis	ureterointestinal	supravalvular	septectomy	thrombosed	collateralization	angiocatheter	anomaly	labcorp
136	ganglia	theriac	baynton	pott	carney	guilt	infinitesimals	lighl	barricade	boutonniÃ¨re	hyperactivity	aspirators	rÃ©gurgitation	carotid	trifurcation	arteriosum	internalcarotid	venotomy	bicaval	cava	cap
137	cebocephaly	rammed	violator	whosoever	mesmerists	acupuncture	card	unembalmed	bunds	squirting	musses	bladeler	portal	medionecrosis	endocardial	popliteal	mammaryartery	atresia	blockages	tricuspid	respironics
138	substantia	sallied	facl	cicuta	pedlars	thompsonian	aids	flints	iuternal	crannies	sequestration	precursor	constrictive	spermatic	pseudodiverticulum	rumbles	coarcted	transvenously	transfemoral	copyleft	viropharma
139	debore	chronometer	appa	hereunto	swindling	assistants	materialists	bootlegged	flics	malpraxis	hawkers	weapon	veutricle	incompetence	closure	pyelolymphatic	anteroapical	femoral	cannulations	chamber	atrial
140	drive	iutroduced	polygala	shaken	particeps	validity	incombustible	saucepan	seducing	sunbaths	meddlers	suicidal	aqueduct	interatrial	thrombotic	superiorvena	tibioperoneal	azygous	cava	medtronics	veins
141	pouch	unslaked	homÅ“opathic	denounces	storekeepers	storage	palmed	stem	uose	hÃ¨	conjoined	leakage	sourceof	fibrocalcareous	ileal	hepatopetal	aortotomy	extracranialintracranial	saphenousvein	lenticulostriate	onyx
142	hoof	spanked	opcrandi	rejection	shallbe	cabalistic	impliedly	trowsers	larders	cheapen	indurating	situ	eisenmenger	urethrovaginal	cushion	femoral	jejunocolic	venosus	internalmammary	microfoam	shareholder
143	hybrid	cuds	palming	plagiarist	merchandize	fromhis	pits	malpraxis	preseribe	importers	evielence	oddi	syphilitie	pericardiolysis	azygous	amplatzer	aortocoronary	azygos	endoprosthesis	waref	atresia
144	shinal	hydrocele	bombast	ungentlemanly	facl	iliis	religion	prohibitory	mauual	teud	liasses	scoundrels	coarctations	decompression	sorta	thebesian	perforations	directive	atresia	labcorp	exelixis
145	insipidus	arlicle	quackish	allopath	ridiculing	evon	occupations	varnishing	slop	foisting	vesicas	sioav	diverticulosis	arrhythmia	aortic	cushions	biloculare	varicose	cannulation	malformation	medivation
146	transport	avhicli	gene	ignoramus	censuring	impeach	interpretation	sccured	additiou	osteum	theintestine	connecting	cholelithiasis	arteriotomies	fallopian	pda	bronchi	pbgi	intercostal	freewall	microbia
147	snowblower	vibration	host	homceopathist	counterfeiting	lilted	sham	consignee	cuspidors	whichwould	resectionists	curved	endophlebitis	counterincision	thromboembolus	constriction	axillofemoral	tefra	cardioembolism	intraprocedural	portal
148	herpes	hitn	broma	illiberality	unsafe	abettors	cigar	trinkets	obturator	spittoons	osteum	jejunostomies	counterincision	pericoronary	vesscls	coarcted	coronar	cppa	endothelialization	occlusion	aorta
149	ulcerative	neeelle	Ã­c	penally	artifice	verbal	bacterium	weapon	hogsheads	produects	lading	fold	blurbs	iliac	orerative	steal	singlevessel	vitelline	sheath	nonmeritorious	paracorporeal
150	hivctr	willis	besl	preju	retorts	fascinations	cutlers	exorcised	strainer	theonly	secret	cecal	commissures	omphalo	thebesian	malformation	rashkind	distal	arterioportal	vicp	portola
151	nesciens	thonght	ibr	famous	instraments	prostitution	alliance	quackery	smuggle	utensil	uose	slipped	tear	obse	aorticarch	inferiorvena	sutures	equalization	bucrylate	guidewires	exclusivity
152	plum	fowling	pattern	usval	drugs	homceopathic	convoyed	lithodeon	distemper	mauual	relievable	otheravise	hepatopexy	thebesius	subvalvular	lobar	azygous	cardiaccatheterization	wingspan	nonlacunar	sems
153	guardians	11Ã¨re	homceopathist	bazar	accuser	assayer	deficiencies	unsalable	counterfeited	truculent	replacement	trinkets	pulmonie	mediastinitis	cineangiocardiography	omphalomesenteric	liac	tricuspid	thoracicartery	neurontin	thrombogenics
154	maternal	valise	confectioners	evon	hoisting	palmed	dutiable	penholder	neeelle	designedly	recontraction	nostrum	coiled	interadherent	ducts	arteriotomy	thyrocervical	authorizations	positioner	lipitor	anscatheter
155	efficiency	scarifier	lactuca	optics	grog	sleel	adherence	dentists	ransacked	adulterators	incisor	stricture	oblit	perforations	urcteral	anomaly	svc	septectomy	nonrenewal	patentable	ventriculoseptal
156	basement	mast	sophistications	cutlery	caskets	withdrawal	vaunt	plush	imprisoning	verywell	vibrators	cleft	arteriolarsclerosis	atrial	ventriculoamniotic	ureter	femorofemoral	choledocholithotomy	stenosis	biopharmaceuticals	alere
157	toxicology	scarificator	basto	adver	desecration	exculpate	laminaria	virtues	pulverizing	recontraction	masking	gauntlets	coronarios	pericarditis	cmboli	ureterovesical	outflow	coronary	hepaticartery	guidant	anomaly
158	phlebotomy	fewdays	trifoliata	cabalistic	dainties	petrifaction	humbuggery	wrapper	onght	importunÃ©e	theinternal	watertight	endocardial	hydronephrosis	umbilical	venous	perforation	segmentectomy	appendage	pacemakers	microfoam
159	sphenoid	taffeta	reme	peremptory	congress	russian	crystal	distillery	habiliments	gastrodiaphane	mushroomed	pouch	sclerosis	reinforcement	venous	frieplich	arterioles	aortofemoral	transjugular	creon	transcatheter
160	sciatic	halfpenny	posology	gannal	abyssinian	sots	eucalyptus	remorselessly	inventors	urethrotoniy	functionates	conus	trieuspid	millerabbott	venorrhaphy	hypoplasia	cannulations	clamshell	univentricular	rotid	licensed
161	fairness	fromhis	perfoliatum	confectioners	basto	knapsacks	attenuations	stockade	untler	currying	retroversion	fissures	fibrocalcareous	gastrojejunocolic	vestibule	hemiazygos	dextroposition	pericardiophrenic	leak	veins	blalocktaussig
162	working	deliquescence	dispensatories	discountenance	knapsacks	hereunto	principio	cunningly	cutlers	overplus	proprietaries	rummage	heparin	papilloma	dolichocephaly	segmental	aorto	coarctation	pharmacomechanical	medicaldevice	ebstein
163	gonorrhea	corsican	anceps	detested	cundurango	lading	barber	fromhis	blockaded	theleast	impolicy	cloaca	medicinal	femoroiliac	anomalies	venacava	thss	inferiorvena	hepatofugal	cempra	varicose
164	aphonia	sensitive	preseription	surveillance	importers	aspersion	seeking	crockery	ostentatiously	uose	contraband	levelling	choledocholithiasis	electrokymogram	arteriotomy	ductal	ventriculovenous	restrictive	mbt	xyrem	antigenics
165	battery	perforator	tiglium	petrifaction	shopkeeper	dupuytrcn	pomades	chasers	spittoon	greatdeal	vesicovaginal	partieular	FALSE	hemorrhoids	thyrocervical	cardioportal	sideto	internalcarotid	cannulate	lvads	mifeprex
166	benedictow	mulled	substituto	accessory	impeach	obsolete	asthey	lopped	vibrators	medicinÃ¡is	varicosed	inorder	pulmonaryvalve	uraehus	suprahepatic	tear	venacavographic	profitmaking	swanganz	multiplane	savr
167	pericarditis	corneal	maledictions	ratchets	saleable	homÅ“opathist	loosest	avast	silks	palmed	ecertain	miscalled	segmentary	hydrohepatosis	obstruction	commissural	valve	anastomoses	venae	carotidartery	heartmate
168	oroyo	forcigners	galen	crowding	cruclty	vender	abettors	magnetizing	giviug	untrustworthiness	isnot	avidely	choleeystitis	megaloureters	defects	right	fibromuscular	reconnection	coiling	transposition	intrahepatic
169	association	composedly	medicinÃ¡is	punishment	hitn	gallipot	hygrodeik	oaten	pretences	ageut	secrelion	extensively	choleeystectomy	tear	venacava	portalsystemic	closed	hernia	epiaortic	antigenics	bayh
170	tinea	nail	copartnership	tests	indecently	mesmerist	fathers	carth	japanned	earrying	shippers	sodalime	insufficience	meconium	reinflated	aortotomy	inversus	arteriovenous	infrahepatic	monopolies	caronia
171	granulation	envelope	homoeopathist	affix	lithontriptic	homceopathists	dishonestly	instrumenta	scrawls	calleel	unserupulous	cultist	venorrhaphy	thrombendarterectomy	tears	left	embolized	torkildsen	thromboendarterectomy	warn	iroko
172	anastomosis	particeps	tuw	expostulations	homaeopathic	disinfector	montesquieu	casings	probangs	lactiferous	fold	avholly	ileal	crafoord	thoracodorsal	ligamentum	pyelolymphatic	supraclinoid	inferiorvena	internalthoracic	celera
173	nile	oaten	lessee	memorialists	proprietor	caskets	neeelle	handling	spoils	defile	roiling	theduodenum	mesarteritis	rÃ©gurgita	herniating	tracheoesophageal	intracaval	anastomotic	recanalize	vsds	depuy
174	adjustment	hurtfulness	mesmerists	electrics	juror	sackcloth	capablo	manufacturo	baited	ihrough	reflux	pericardial	portae	regurgita	rightto	atria	thromboembolus	lamos	malpositioning	antiplatelets	transseptal
175	chara	provings	vaunt	rnay	slating	guiltless	prostituted	pillory	disgustingly	iuflueuce	liniral	clone	anticoagulate	aneurysm	cryptorchidism	crossclamping	teries	calfvein	trileaflet	outflow	severability
176	humor	blackens	inexpediency	facl	shyster	jobbers	schuft	compositors	vulcanized	intestinos	edibles	panic	monest	ivalon	atria	intima	femoral	percutancously	cavae	vsd	lipitor
177	nifla	fseces	thompsonianism	pitch	anieles	denounces	sackcloth	knavery	staterooms	peddling	eustaehian	loose	rumbles	mikulicz	speckling	polysplenia	tracheoesophageal	aorticarch	stenosed	sanofisynthelabo	pharming
178	recurrent	girded	hunier	saleable	handbill	seethe	adverse	fungosities	restrictive	hasbecome	bridles	cnters	regur	hemothorax	transventricular	retrograde	venacavography	exploratory	cuffed	anomalous	ikaria
179	polar	pott	inven	unlawfully	acceptance	homeeopathic	rnay	syphonage	swill	narroav	laryngostomy	intercommunicating	vein	diverticulums	wall	annulus	ectasia	nonrenewal	percutancously	overmeire	dtca
180	cotyledon	champaigne	narcoties	gilding	embalm	simpleton	cutlery	envelope	adulterate	weknow	cholagogues	affixing	varicosed	nodal	arcades	blalocktaussig	arteriograms	ostia	extracranialintracranial	clot	neurontin
181	police	cell	smilax	oihers	simpleton	usval	flies	trestle	scoops	othei	fooel	rÃ©gurgi	infarctions	aorta	cholecystoduodenal	ducts	supravalvular	genericdrug	embolized	transesophagealechocardiography	hermal
182	p1025	bridal	stereotyped	mesmerizers	impudent	host	verbal	dients	daugerous	shoultl	contenÃ­	buttonhole	cholecystitis	esophagojejunal	common	diverticulum	superiorvena	cannulation	septectomy	toconsumer	hokusai
183	cricoid	cÅ“sar	paient	proselytes	conduct	saleable	deigned	calico	importers	pennyworth	frecal	cavi	deferens	choledocholithiasis	septectomy	hypertension	threevessel	tracheomalacia	renarrowing	pliva	septum
184	preferences	invectives	panegyric	homceopathists	regulation	homeeopaths	quackeries	hotwater	bagatelle	spouting	disunion	stethoscope	bundlebranch	pouch	aortotomy	impacted	splenoportal	decompression	nonaneurysmal	saphenousvein	cryoballoon
185	kristnesi	hopped	veratrum	lithontriptic	goof	villainous	alnost	graveyards	divulsing	compounder	visible	appendage	arteriovenous	pilonidal	pipestem	arachnodactyly	arterics	radialartery	basilar	transapical	chmp
186	evali	lithontriptic	bazar	quantum	invectives	artistic	staterooms	threshing	flatters	unquestion	necessaiy	rÃ©gurgita	halftruths	atresias	anastomosis	cystic	irds	crus	ventriculoseptal	echodensities	positioner
187	survivors	chanting	pharmacopaia	licensed	physitians	dbut	tunnel	grog	bazar	readymade	othei	semiflexible	myocardopathy	ocelusion	ectasia	perimembranous	portasystemic	unthrombosed	incompetence	trevo	grifols
188	hemorrhagic	delayed	matchless	remedium	defrauding	sacredly	adulterators	insect	artifice	overfilled	prineiple	cannulating	ocelusion	gralts	embolized	reanastomosed	rightto	delivery	ecmo	conflictof	medarex
189	turkey	sorest	whosoever	seethe	treadle	basto	valions	lessee	stenches	cheapened	cascal	ileocecal	drugs	vein	ostium	endothelialized	ocelusion	subsegmental	flap	bailout	cardioverterdefibrillators
190	embryo	wasremoved	dulcamara	signal	dastardly	allopathist	toxicophagi	faker	pomade	unwrapped	anomalous	escape	persistence	tendineac	sinuses	thrombosis	bucrylate	intrahepatic	bioprosthetic	artery	nitromed
191	models	molest	publishod	compositors	allopath	knavery	preference	indiarubber	11Ã¨re	syringe	anastomotic	lurge	epiploic	basilar	intima	intercoronary	nonventilated	colocutaneous	arterybypass	maceuticals	esperion
192	loop	project	snys	doctress	hydropathy	asido	manufacturo	hounded	fattens	extraets	menacing	abuse	cholangeitis	defunctioning	efferent	clamshell	scptum	rashkind	toright	ventriculoperitoneal	pneumothorax
193	costal	matrass	mesmerist	hydropaths	magistral	pomade	prepossession	rammed	wastepaper	vaunteth	cavi	wuy	endocardia	descending	tibial	reflux	extrahepatic	upc	transapical	minimis	steal
194	onyalai	agnin	nomine	disrespectfully	denial	scouted	sufferance	earrying	swears	patentee	entangles	drug	arterioles	bronchi	coronarles	arvows	cavernous	procompetitive	paraprosthetic	media	janssencilag
195	scorpion	charriÃ©re	itinerants	besl	mountebanks	pattern	disinfectant	hacked	overplus	evitable	butchering	rackets	pattrolocical	anomalous	cavagram	situs	atherosclerotic	thromboembolectomy	ivalon	nonrenewal	mitr
196	limitation	wlhich	seutin	bagatelle	penally	release	cuticura	treadle	fiats	ligamentary	fining	avhose	aortitis	phlebitis	poststenotic	calcific	interatrial	rvaf	cannulated	brachiocephalic	accelerated
197	transfer	disgorgement	adulterators	conscience	repairer	ignoramus	augean	affix	unfastened	coutraindicated	dentis	gallstones	embolizing	polycystic	eisenmenger	recanalized	diaphragmatic	semirigid	arteriotomy	solitaire	paclitaxeleluting
198	transformed	congeal	distillers	propricty	humbuggery	expostulations	virtues	trademark	gasolene	baldly	doavnward	chink	cholangitis	tricuspidvalve	endothelialized	azygous	anastomoses	appendix	streamlines	clopido	bypassing
199	bird	tract	orthopedic	assayer	cushions	jugglers	desirability	fattens	affixes	disgorge	physis	bulldog	ascending	atherosclerosis	coronar	cmboli	noncyanotic	femoralvein	nonthrombotic	pallas	direct
200	situ	swallows	goat	accuser	adulterate	sin	untrammelled	sterilize	yeomanry	miscalled	dutiable	levelled	defect	thebesian	veins	torkildsen	hepatogram	negotiates	bioprostheses	sequoia	angiogr
