# Supplementary material for: Insights from full-text analyses of the Journal of the American Medical Association and the New England Journal of Medicine
Source: eLife. 2022 Jul 7;11:e72602. doi: 10.7554/eLife.72602 (PMC9262397; doi:10.7554/eLife.72602)
Supplement: Supplementary file 3. [file elife-72602-supp3.xlsx]

## Sheet: eTable_4_abortion_JAMA
	1880-1889	1890-1899	1900-1909	1910-1919	1920-1929	1930-1939	1940-1949	1950-1959	1960-1969	1970-1979	1980-1989	1990-1999	2000-2009	2010-2019
1	premature	miscarriage	miscarriage	delivery	miscarriage	miscarriage	miscarriage	miscarriage	pregnancy	abortions	abortions	contraception	abortions	miscarriage
2	miscarriage	previa	criminal	miscarriage	pregnancy	habitual	habitual	contraception	abortions	pregnancy	contraception	abortions	tellingly	stillbirth
3	ectopic	labor	pregnancy	pregnancy	puerperal	puerperal	ahortion	pregnancy	threatened	euthanasia	pregnancy	birth	eapen	birth
4	labor	endometritis	delivery	eclampsin	ahortion	criminal	pregnancy	ahortion	intrauterine	midtrimester	euthanasia	criminalized	offsite	obstetric
5	ufero	pregnancy	labor	tubal	delivery	ahortion	threatened	habitual	miscarriage	abor	ectopic	conraception	infertility	intrauterine
6	accouchment	ectopic	ectopic	inbor	pregnant	stillbirth	criminal	aborted	contraception	legal	midtrimester	midtrimester	legalization	spontaneous
7	delivery	puerperal	pravia	ahortion	criminal	abortions	hydatidiform	stillbirth	infertility	amniocentesis	unwanted	secondtrimester	mischaracterizes	cdmr
8	faetus	eclampsia	eclampsia	puerperal	spontaneous	pregnancy	menorrhagia	delivery	labor	criminal	tubal	eugenic	pregnancy	pregnancy
9	hzmorrhage	delivery	premature	premature	eclampsia	threatened	menstruation	threatened	delivery	unwanted	fetus	sterilization	legalizing	nonlegal
10	criminal	intrauterine	previa	placenta	dystocia	delivery	ectopic	abortions	postpartum	sterilization	ovum	amniocentesis	contraception	preeclampsia
11	foetus	postpartum	placenta	eclampsia	postpartum	infertility	mole	puerperal	fetus	secondtrimester	sterilization	criminalization	lauinger	contraception
12	coitus	gonorrhea	endometritis	pregnant	placenta	eclampsia	abruptio	placentae	sterilization	infanticide	miscarriage	multifetal	physicianassisted	postterm
13	incarceration	preevia	puerperal	pregnaney	labor	divorce	postpartum	eugenic	abruptio	contraception	stillbirth	legalized	notamong	multifetal
14	haeemorrhage	premature	pregnant	endometritis	tubal	labor	uterus	hydatidiform	euthanasia	miscarriage	secondtrimester	legalization	moral	pphn
15	hiemorrhage	placenta	postpartum	uterine	uterus	abruptio	previa	pregnant	ahortion	postpartum	amniocentesis	gestational	posttraumatic	secondtrimester
16	impaction	retroversion	crime	previa	salpingitis	placentae	intrauterine	spontaneous	amniocentesis	aborted	surrogate	infanticide	guilt	delivery
17	pregpancy	sepsis	tubal	salpingitis	sterilization	sterilization	placentae	toxemia	eugenic	experimentation	abor	euthanasia	training	reoffending
18	feetation	ahortion	ahortion	rupture	arrest	intervention	uterine	afibrinogenemia	placentae	marriage	embryo	menstruation	secondtrimester	chalenges
19	fÅ“tus	criminal	ventrofixation	myoma	febrile	sepsis	infertility	intrauterine	uterine	birth	pregnant	unwanted	midtrimester	incarceration
20	septiciemia	insanity	intrauterine	uterus	aborted	abor	tubal	tubal	abor	divorce	fetal	tubal	amniocentesis	postpartum
21	hwemorrhage	fetus	preevia	postpartum	premature	uterine	superfetation	previa	criminal	couples	legal	firsttrimester	legal	unwanted
22	parturientium	subinvolution	dystocia	pravia	fruhinsholz	eugenic	toxemia	criminal	menstruation	masturbation	aborted	criminalizing	opt	divorce
23	inversion	menopause	salpingitis	menstruntion	adnexitis	hyperemesis	placenta	quintuplet	anovulation	women	legalization	guttmacher	vbac	ovulation
24	mutilation	secundines	appendicitis	mole	menstruation	uterus	dysmenorrhea	eviderce	insemination	ethical	pregnancies	physicianassisted	abor	fetus
25	dystocia	pravia	rupture	sepsis	ectopic	missed	delivery	postpartum	stillbirth	ovum	experimentation	experimentation	scalia	breech
26	ovum	accouchment	eclampsin	labor	fetus	septic	pregnant	ectopic	pregnant	psychiatric	lauinger	abor	grimes	threatened
27	threatened	pregnant	menopause	preguancy	pneumothorax	contagious	abortions	mole	aborter	insemination	infertility	legalizing	postabortion	abortions
28	marital	prolapse	dysmenorrhea	placentn	parotitis	toxemia	puerperal	insemination	iucd	labor	insemination	obstetric	sterilization	chorioamnionitis
29	aborted	uterus	fetus	stillbirth	epizootic	suicide	crime	uterine	coitus	therapeutic	infanticide	stillbirth	progressives	infertility
30	wtero	preguancy	extrauterine	criminal	gynecologic	pregnant	abortionist	uterus	idiograms	tubal	intrauterine	contracepion	medicalization	pregnancyrelated
31	precursor	csesarean	abortionist	retroversion	hyperemesis	placenta	rubella	polyhydramnios	legal	disputes	perinatal	embryo	firsttrimester	eclampsia
32	secundines	ceesarean	vaginofixation	fetus	gravidarum	obstetric	breech	fetus	spontaneous	postabortion	prematurity	pregnancy	menstruation	pdmp
33	eclampsia	hematocele	abortlon	febrile	hydatidiform	infectious	stillbirth	eclampsia	liley	law	spontaneous	plann	principlism	hrrp
34	intussusception	metrorrhagia	hematocele	menstruation	rupture	intrauterine	fetus	aborter	septic	spontaneous	pregnan	paternalism	euthanasia	nonpreeclamptic
35	seizure	dystocia	metrorrhagia	gonorrhen	uterine	pregmancy	erythroblastosis	dystocia	menopause	legalizing	nonlegal	proseription	psychological	perinatal
36	septiczemia	dysmenorrhea	retroversion	arrest	peritonitis	tubal	dystocia	abruptio	uterus	religious	jpsa	vbac	virginity	reincarceration
37	haematocele	sapremia	incarceration	dingnose	coitus	menopause	accreta	abusus	postpregnancy	moral	marriage	embryonic	pelvic	vpds
38	csesarean	menorrhagia	uterus	preevia	castration	fetus	ovulation	infertility	therapeutic	vdac	legalized	assisted	forinstance	nonvaccination
39	coition	inertia	parturient	menopause	endometritis	pregnancics	azoospermia	pregnancics	amenorrhea	legalization	maternal	teenage	nonconsensual	aqc
40	crime	pregpancy	mastitis	gonorrhea	retroversion	contraception	abor	choriocarcinoma	intervention	nontherapeutic	prenatal	antiabortion	decriminalization	hdhps
41	rupture	tubal	insanity	toxemin	stillbirth	gravidarum	preeclampsia	placenta	suicide	proxy	postabortion	decriminalization	chalenges	mistimed
42	inertia	atresia	sepsis	ileus	myoma	spontaneous	aborted	ovarian	quintuplet	conceptuses	obstetric	noncoital	circumeision	criminalization
43	prievin	menstruation	prolapse	induced	sepsis	menorrhagia	contraception	pseudocyesis	pregnancies	delivery	postpartum	insemination	ghraib	emtala
44	anteversion	inversion	abor	pregnuncy	praevia	cxtra	eclampsia	accreta	midtrimester	threatened	birth	intrauterine	annas	abortionrelated
45	uremia	uterine	pregpancy	intrauterine	septic	aborted	spontaneous	hysterotomies	cxtra	ovulation	death	postabortion	olitics	thirdtrimester
46	metrorrhagia	coitus	peritonitis	lubor	menorrhagia	postpregnancy	coitus	superfetation	secondtrimester	conscience	legalizing	ivf	prenatal	nonanomalous
47	accidental	hemorrhage	inbor	ectopic	toxicoses	endometritis	lactation	amenorrhea	proctocolitis	psychological	noncoital	ofpregnancy	drbulfin	bfhi
48	copulation	trachelorrhaphy	retrodisplacement	uterns	seizure	parturient	pseudocyesis	hyperemesis	birth	pregnant	prostitution	chalenges	antiabortion	pmtct
49	parametritis	podalic	ablatio	ovulation	pregmancy	coitus	pregmancy	malpresentation	lactation	notamong	notamong	obscenity	birth	criminalizing
50	pregnacy	ventrofixation	hyperemesis	ophthalmin	abortions	postpartum	prematurity	endometriosis	marriage	physicianassisted	ethical	ellenborough	intrauterine	medicaideligible
51	typhlitis	abor	menstruation	cclampsia	obstetric	menstruation	preguancy	legal	aborted	idiograms	counseling	prostitution	assisted	ipledge
52	placenta	breech	uterine	ovum	immunization	peritonitis	fetalis	postpregnancy	preeclampsia	jpsa	physicianassisted	postterm	debriefing	parental
53	postpartum	uremia	ectopie	prievia	pyelitis	superfetation	bleeding	menopause	postdate	parents	criminalizing	celibacy	spontaneous	ihdp
54	ahortion	extrauterine	eriminal	parturient	perforation	ablatio	cxtra	salpingitis	transvestism	prematurity	labor	surrogacy	unwanted	ohss
55	cellulitis	rÃ©troversion	castration	operntion	intervention	fruhinsholz	missed	obstetric	postmature	lauinger	ovulation	coitus	stress	clinicianinitiated
56	dysmenorrhcea	curettement	uteri	peritonitis	tetanus	artificial	endometriosis	postmaturity	nancies	outcome	infant	marriage	punishment	embryo
57	uterogestation	crime	sapremia	cervix	parturient	castration	luteum	postmature	amniotic	lsd	criminalization	tellingly	pronatalist	whcra
58	pregnancy	salpingitis	prosccution	nfter	eclampsism	arrest	previable	anencephaly	amniotomy	fetus	couples	olitics	criminalize	refusal
59	ogphorectomy	lactation	marriage	childbirths	metrorrhagia	cattle	pyelitis	rubella	infanticide	infant	cdmr	virginity	criminalization	maternal
60	hydatidiform	peritonitis	mole	toxemia	superfetation	pneumothorax	isoimmunization	labor	puerperal	stillbirth	endangered	proabortion	infibulated	nonconsensual
61	primiparee	embryotomy	prievia	bleeding	leukorrhea	abertion	malpresentation	coitus	didache	death	malformed	mischaracterizes	proabortion	macrosomia
62	fatus	rupture	preguancy	pubiotomy	hellendall	cohabitation	prosccution	prematurity	bereavement	laparoscopic	sexually	preconception	multifetal	criminalizes
63	ovisac	eclampsin	embryotomy	coitus	prolapse	partners	endometritis	myoma	previable	intervention	gestational	teratology	pragmatics	paternal
64	ovariotomists	perium	obstetric	mensures	neonatorum	gonorrhea	pregnancies	preeclampsia	previa	conformity	firsttrimester	ectopic	legalize	unemployment
65	event	ablatio	gonorrhea	immedinte	extramembranous	insemination	hyperemesis	preguancy	ovulation	incarceration	preeclampsia	anticontraception	postpartum	eset
66	urzmia	accouchement	lithopedion	ventrofixation	hemoptysis	sterility	pregnancics	abor	eviderce	feticide	unethical	oocyte	stigma	macroeconomic
67	foreÃ©	hyperemesis	ovarian	dysmenorrhea	bleeding	metropathia	progesterone	intervention	polyhydramnios	maternal	divorce	midwives	infanticide	disproportion
68	decidua	odphorectomy	hysteropexy	cesarenn	punishment	abortionist	sterility	cxtra	postabortion	homosexuality	coitus	preimplantation	postdate	asthmarelated
69	multiparee	spontaneous	retrodisplacements	amputation	iraeta	salpingitis	feticide	prediabetic	cervix	iucd	proseription	circumeision	kidnapping	mothers
70	previa	uteri	suppuration	mastitis	ileus	preguancy	salpingectomy	menstruation	pill	ahortion	criminalize	macrosomia	gestations	agebased
71	o6phorectomy	hzmorrhage	accouchment	cnuses	handorn	leukorrhea	couples	pregnancles	habitual	pregnancies	tellingly	gestations	brainwashing	allindividuals
72	dysmenorrhea	hiemorrhage	insunity	iabor	ablatio	marriage	podalic	stallworthy	endometrial	firsttrimester	milunsky	disinformation	didache	reestimating
73	gravidarum	uterogestation	pregrancy	ovarian	dislocation	premature	manslaughter	cesarian	endometritis	fetal	laminaria	ovulation	legalized	endangerment
74	impotence	varicocele	podalic	threatened	apoplexy	dystocia	metropathies	hydramnios	law	adultery	proabortion	miscarriage	seeking	gestational
75	cazeaux	vaginitis	ventrosuspension	indueed	schickelÃ©	eviderce	pregrancy	illegitimacy	secundines	only	postdate	pregnancies	emtala	pitc
76	menopause	perineum	cesarenn	cnuse	ventrifixation	postabortion	midforceps	inertia	postmaturity	decision	dystocia	feticide	reconceptualization	avoluntary
77	hzemorrhage	pyelonephritis	arrest	lactation	gonorrhea	pseudocyesis	pregnancles	pregmancy	tucd	conceptus	chalenges	contraceptive	crisis	highcost
78	inertin	preavia	hematoma	toxicoses	rissmann	impotence	cervix	premature	feticide	menopause	nonvoluntary	antidumping	minors	ntdaffected
79	ileus	ufero	incendiarism	operntions	klaften	insanity	indictable	salpingectomy	pgu	intrauterine	preconception	legal	abstinence	asphyxia
80	septicemia	adenoids	subinvolution	insunity	amenorrhea	ectopic	disproportion	preavia	incomplete	concep	premature	rearing	mifepristone	prenatal
81	trauma	foetus	cervix	sapremia	cristalli	feticide	eviderce	triplets	couples	legalized	contraceptive	religious	invincibility	individuallevel
82	odphorectomy	ovariotomy	unsexing	habitual	naujoks	commitment	bastardy	euthanasia	conceptus	crime	delivery	infertility	ahortion	preconception
83	pyzemia	anteflexion	foreÃ©	denth	haselhorst	hydatidiform	amenorrhea	castration	conceptuses	minors	teenage	notamong	historiographical	prenatalcare
84	oÃ¶phorectomy	amputation	neonatorum	spontaneous	chickenpox	eclampsism	laparotrachelotomy	rupture	pregnancles	nonvoluntary	iud	feminism	exceptionalism	diseriminatory
85	abertion	cervix	puerperinm	infunt	anthrax	septicemia	extrauterine	luteal	mole	amniocenteses	stigma	jpsa	alism	overpayments
86	subinvolution	gravidarum	habitual	cesnrean	vaccination	acute	retroversion	hydatiform	ovum	sterilizations	chorioamnionitis	nsfg	reproductive	ahcccs
87	preghancy	suppuration	malingering	vaginofixation	intrauterine	dangerous	hysterotomy	retroversion	bleeding	ngri	vdac	drbulfin	formalizes	macrosomic
88	overdose	hydatidiform	menorrhagia	infunts	artificial	prosccution	postpregnancy	fetopelvic	abusus	enticement	proxy	hippocratic	malpractice	ivf
89	cesareanized	mania	cystitis	hematocele	embryotomy	euthanasia	metropathia	cervix	tubal	illegitimately	paternalism	birthing	relativism	minors
90	embryo	gonorrheeal	lacerations	marringe	bacteriuria	rupture	parturient	superfecundation	abruption	dinoprost	decriminalized	postdate	agich	offsite
91	hematocele	septicemia	mania	enuse	oxyuriasis	hysterotomies	chorionepithelioma	neonatal	procrastination	postdate	minors	nonvoluntary	ectopic	nonmaternal
92	hmmorrhage	pyosalpynx	dermoid	ngainst	andÃ©rodias	myoma	prenatal	hysterotomy	interruptus	psychedelic	feticide	parenthood	sanctions	hyperstimulation
93	catharsis	aborted	regnancy	cesavean	inversion	salpingectomy	prostitution	suicide	women	hysterotomies	criminalized	atempted	genocide	midwifery
94	preevia	retrodeviation	accouchement	enuses	metropathies	death	quintuplet	fetal	aborters	child	contracep	conceptus	suicide	icsl
95	atresia	cazeaux	perforation	pyelitis	divorce	gynecologic	inertia	infanticide	divorce	inseminations	rearing	divorce	childlessness	toinfant
96	feetus	triplets	cesavean	septic	childbirths	mole	menopause	lactation	perforation	behaviors	sexuality	vaginal	benevolence	costand
97	laughter	abortionist	hemorrhage	miscarringe	nevermann	toxicoses	incarceration	divorce	chromosomal	offspring	mischaracterizes	progressives	bans	incentivizes
98	fetation	pelvic	spontaneous	prievin	accreta	manslaughter	natureopath	postabortion	hysterotomies	behavior	endometriosis	didache	preemption	asuccessful
99	horn	otphorectomy	pregnaney	dpregnancy	fever	birth	unexplained	uteri	endometriosis	adulterous	parenting	lactation	hyperprescribers	livebirth
100	prolapse	fracture	ectoplc	indieation	nubiola	podalic	felonies	idiograms	battered	justice	menstruation	incest	couples	noncompletion
101	rescue	foreÃ©	punishment	ncute	whooping	breech	lahor	husslein	prematurity	didache	monogamy	proscribing	alarmism	miscarrying
102	fetus	ovaritis	pregmancy	amenorrhea	habitual	praevia	ovarian	sterilization	outcome	drug	antiestablishment	nonlegal	firestorm	nonmalformed
103	sapreemia	delusional	erime	ense	marriage	offspring	retrodisplacement	disproportion	toxemia	prenatal	inseminations	marginalization	conraception	prostitution
104	preavia	lacerations	anteflexion	dellvery	lithopedion	adultery	aborter	pregnaucy	vulvovaginitis	kuomintang	habitual	contentiousness	pasts	prisoners
105	occwrred	vaginofixation	malpractice	pregrancy	serotherapy	metropathies	leukorrhea	javert	misearriages	contracepion	refusal	puritanism	exculpation	aneuploidy
106	hazmorrhage	myomectomy	otphorectomy	suspeeted	dysmenorrhea	pregnancles	divorce	perium	preghancy	aborter	suicide	lnmp	backlash	homelessness
107	heemorrhage	caseof	retrodeviation	dystocia	fibroma	prenatal	abetting	adultery	nubile	iffy	trophoblastic	cannibalism	gorbachev	subfecundity
108	lubor	pyonephrosis	coitus	tubnl	suppuration	epilepticus	myoma	cornual	miscarried	pill	reproductive	antiestablishment	preemie	handovers
109	orgasm	pneumonia	gonorrheic	puerperinm	heidler	quintuplet	ablatio	mastitis	adultery	decriminalized	conceptus	agich	feminist	healthinsurance
110	anticipation	narcosis	cesnrean	serotherapy	preguancy	psychosis	sanipractor	uterogestation	contracepion	psychiatrist	gestations	antifeminist	criminalizing	nearterm
111	idiot	hysterotomy	goldspohn	neonatorum	fatal	emasculation	eclampsias	insanity	hydatidiform	nonlegal	uterine	formalizes	rehnquist	potenial
112	misearriages	pregmancy	lubor	appendicitis	newborn	addiction	dyspareunia	incomplete	asphyxia	chromosomal	transplacental	incarceration	dismantling	seasonality
113	retroflection	amenorrhcea	ovariotomy	eriminal	placentae	postabortal	inseminate	endometritis	pregnan	preabortion	hydatidiform	ahortion	obstetrics	spillover
114	septiceemia	impotence	pubiotomy	superfetation	decapitation	cesareanized	praevia	sepsis	medically	physician	sterilizations	euthanasiaand	opting	preemie
115	fcetus	unsexing	accidental	operntive	malaria	prostitution	salpingitis	therapeutic	embryopathies	refusal	trimester	concep	asylees	stls
116	succenturiata	prostatitis	phimosis	hydronephrosis	perium	asexualization	ectopie	breech	prenatal	deeision	fertilization	monogamy	goodlin	injuryrelated
117	peritonitis	urethritis	infant	adnexa	uteri	bleeding	pravia	endometrial	obstetric	attitudes	mistimed	fertilization	federalism	geographies
118	punishment	anuria	menstruntion	vagina	complications	perium	metrorrhagia	vaginofixation	newborn	preconception	oocyte	motherhood	criminalizes	tochild
119	enciente	intussusception	gestatlon	aente	appendicitis	undulant	hysterotomies	complications	malpresentation	marihuana	cesareandelivery	legalize	biko	criminalize
120	septicamia	birth	nephritis	hysteropexy	relapsing	parturition	cervicitis	pregpancy	pregancy	noncoital	rubella	mistimed	rationalization	parity
121	appendicitis	primiparee	feticide	celampsia	phlebitis	laparotrachelotomy	preevia	pregrancy	hydramnios	empirical	stigmatizing	courtship	amenorrhea	spillovers
122	severe	seizure	prostitution	hemorrhnge	acute	lahor	retrodisplaced	varicocele	midgestation	control	tiefel	nonconsensual	rebuts	cdcis
123	unsexing	fetation	hysteria	uteri	measles	amenorrhea	eriminal	postabortal	parturient	mothers	reform	mutilation	celibacy	therisks
124	primiparze	parametritis	ophthalmia	cesarcan	vaginal	childlessness	postabortal	abruption	maternal	abruptio	adultery	medicalization	antifeminist	npis
125	atlack	trauma	lactation	ruptured	henrotay	febrile	punishment	anovular	salpingitis	dissatisfaction	nancies	lauinger	stillbirth	neonatologists
126	miscarringes	feetus	urethritis	twins	abor	appendicitis	insanity	pregancy	somagrams	medicomoral	congenital	delivery	unintended	pdmps
127	colitis	masturbation	retrodisplaced	retrodisplacement	anencephaly	superfecundation	insemination	iucd	firsttrimester	prehysterectomy	ahortion	cesareans	mutilation	nontherapeutic
128	dilatoriness	hystercctomy	ruptured	artificinl	hypnosis	hysterotomy	ovulations	foetus	amnioscopy	miscarried	spermicide	bans	embryo	singletons
129	hwmorrhage	malingering	hebotomy	pneumothorax	adnexa	abusus	arrest	inseminations	deadborn	blighted	stillbirths	criminalize	myth	intergenerational
130	miscarry	hemoptysis	hystereurynter	salvarsun	hiissy	measles	preavia	septic	undelivered	pregnan	dumping	roev	sdmc	systemlevel
131	officiousness	primapara	retrodeviations	prolapse	cesarcan	unexpected	javert	rectocele	cervicitis	iuds	lebolt	pregnan	overturn	opioidrelated
132	induced	retrodisplacement	prosecutrix	pregmancy	superinfection	uterogestation	curettements	feticide	dysmenorrhea	withdrawal	breech	postpartum	saikewicz	separation
133	perinaum	inbor	taxis	ectoplc	smallpox	whooping	criminals	metropathies	iucds	eriminal	genetic	databanks	cdmr	couples
134	hamorrhages	epididymitis	hystercetomy	eelampsia	turgidization	sanipractor	pracvia	leukorrhea	abuse	infertility	uterus	draconian	benshoof	outsourcing
135	uramia	pregrancy	manslaughter	hematurin	suicide	indictable	inseminations	vaginal	vaginitis	judaism	anencephaly	reumann	criminalized	reproductive
136	heematoma	ectopie	anuria	abor	amputation	eclampsias	adultery	marriage	stillbirths	rubella	ethics	pragmatics	toresolve	polytherapy
137	disfigurement	tubai	csesarean	retrodeviation	septicemia	causyth	preg	placentitis	withdrawal	antifeminist	offspring	antismoking	nondiscrimination	lejr
138	tubal	retrodisplacements	aborted	enrly	sauphar	punishment	superfecundation	pregnanecy	rupture	eclampsia	chlamydial	handguns	feticide	retardation
139	heematocele	trachelorraphy	pelvic	hysterotomy	contagious	miscarriages	glovka	previable	sexual	virginity	preimplantation	inseminations	rape	fetal
140	manceuvres	afterbirth	rÃ©troversion	cnse	epididymitis	sexual	suicide	nontherapeutic	isoimmunization	genetic	moral	noncontraceptive	iffy	bpci
141	amenorrhcea	morrhage	amputation	acute	transfusion	epididymitis	eclamptogenic	pneumothorax	foetus	contracep	ngri	procedures	prpa	hcps
142	asthenia	lithopedion	secundines	malarin	mandelstamm	criminals	postabortion	pregnancies	menorrhagia	procedures	decriminalization	icsi	reprisal	scrn
143	incendiarism	malpresentation	abusus	pyemin	pracvia	anencephaly	postabortive	anencephalie	papyraceus	the	iffy	intrainstitutional	cutbacks	certifiers
144	postpregnancy	cesareanized	hymen	uterlne	eclampsin	venereal	cephalopelvic	midforceps	inseminate	amniotomy	eclampsia	1840s	resilience	caresensitive
145	cwsarean	nephrorrhaphy	placentn	inertia	pravia	inertia	gynecologic	preghancy	sepsis	gender	drbulfin	orintentionally	intransigence	therate
146	cataleptic	coition	superfetation	accouchment	death	sztehlo	panimmunity	malignancy	uterogestation	second	ofpregnancy	breech	nonvoluntary	extraimmunization
147	floodings	emasculation	divorce	tuberenlous	inertia	epizootic	pregnaucy	induced	placentitis	breakthrough	salpingitis	decriminalized	dismissively	confidentiality
148	hallucination	twins	abertion	metrorrhagia	meningitis	pregnaucy	abertion	curettage	preavia	acquittees	macrosomia	preeclampsia	endometriosis	prelabor
149	marriage	cwsarean	miscarringe	scpsis	prostitution	natureopath	gravidarum	addiction	intranatal	unethical	spermicides	feminist	garbarino	cfdna
150	cephalotripsy	superinvolution	dellvery	maternal	lactation	vaginofixation	prosecutrix	embryotomy	placenta	misbehaved	ntd	copycat	presuit	firsttrimester
151	sus	celiohysterotomy	infanticide	sterilization	purpura	negligenee	labor	intranatal	olitics	suicide	menopause	sexu	vietimized	careand
152	amenorrhea	puberty	myomectomy	regnancy	prosccution	metrorrhagia	panhysterectomy	ejaculation	pregnancics	hysterotomy	childbirth	plautus	taboos	rollout
153	castration	abscess	abuse	foreÃ©	preevia	bastardy	hysteropexy	hemorrhage	neurosis	menstruation	geneticinformation	aborted	disinformation	uncoerced
154	uninter	ventrosuspension	pyelitis	linble	asexualization	placentitis	sterilization	ablatio	ethics	overprotective	saikewicz	iffy	womens	placenta
155	pysemia	prievin	gomorrheal	hystercetomy	hemorrhagic	malpresentation	hysterectomy	obstetrically	amnionitis	sexual	fetoscopy	minors	surrogacy	bpcl
156	dyspareunia	inertin	cesarcan	certnin	scpsis	attack	nancies	adenomyosis	hyperstimulation	interviewing	threatened	hymen	psychiatricillness	tobaccocontrol
157	previn	primipare	retrofiexion	septicemia	crisis	embryotomy	incomplete	menorrhagia	fetal	expulsions	msafp	decontextualized	nonlegal	carerelated
158	resuscitation	misearriage	ovulation	hemorrhage	criminals	abortifacient	husslein	postabortive	incompetence	eugenic	teratogenesis	icsl	psychosurgery	highincome
159	cystitis	menstruntion	celiohysterotomy	usunl	pÃ©ry	leunbach	ovum	dysmenorrhea	vaginal	denial	dalkon	discharge	morals	harassment
160	ovaralgia	misearriages	parametritis	taxis	hydramnion	illegitimacy	karnaky	miscarriages	policy	karyotypically	outlawing	sanctions	pregnancies	concems
161	amnion	attack	ceesarean	abortlon	tuberculosis	postabortive	postmenopausal	papyraceus	vdac	semen	spina	sterilizations	icsl	ppaca
162	unnat	obphorectomy	hernia	complientions	crime	glovka	abnormal	pregnan	dystocia	misprescribing	superfecundation	nontherapeutic	isna	progestinonly
163	myoma	symphysiotomy	tubnl	praevia	transmissible	adnexitis	cesarian	postdate	appendicitis	quintuplet	proscribing	luker	teenage	registrybased
164	phlebotomy	child	gynecologic	sexunl	abortum	prosti	pregnandiol	dyspareunia	addiction	remarriage	olitics	childrearing	forgoes	ngri
165	casarian	dysmenorrheea	hemorrhnge	inertin	induced	recidivation	estrogen	isosensitized	lehfeldt	criminalize	parental	personhood	effectuation	anprm
166	heematuria	cholelithiasis	vagina	misearriage	hemophilia	intranatal	wedlock	endomyometritis	commitment	lactation	pid	offsite	odent	adopter
167	viburnum	cystocele	metreurynter	missed	abruptio	lactation	stallworthy	hreech	fetopelvic	reform	homosexuality	dalkon	olicy	reproductiveaged
168	endosalpingitis	symphyseotomy	ecase	perforation	pockels	toxemias	cesareanized	perinatal	curettages	cdmr	endometrial	19thcentury	dahi	negotiating
169	impris	gangrene	preavia	menstrunl	jonen	wedlock	exsanguination	laparotrachelotomy	antepartal	femininity	disputes	pronatalist	halacha	cmos
170	hsemorrhage	succenturiata	herrgott	asphyxia	paucot	misearriages	pregpancy	stilibirths	anovulatory	phakoemulsification	cocaine	fetus	divisive	weightspecific
171	ansthetic	cystitis	iabor	shock	mole	tonsillitis	endometrial	quartipara	fetu	mwc	law	diseriminatory	threatened	participationin
172	fcetal	prosecutrix	intussusception	pregpancy	osteomyelitis	alcoholism	negligenee	gravidarum	infant	traception	baby	labor	anencephalic	statelevel
173	acephalous	gonorrheic	hysterotomy	treutment	birth	puerperium	hydramnion	secondtrimester	rubella	grief	dissent	developmentsin	uprisings	phi
174	atiended	prievia	mastoiditis	crime	placental	cervix	commitment	treatment	dysmature	practice	antifeminist	bisexuality	executions	vpt
175	ustilago	suicide	ventral	ablatio	cervix	abstinence	anovular	remature	notamong	sex	lactation	fetal	reprisals	reauthorized
176	trachelorraphy	dislocation	septic	delay	cohabitation	traumatic	homosexuality	allylestrenol	legalized	operations	alcoholrelated	neerhof	destigmatize	rtis
177	semen	septic	perium	embryotomy	tuberculous	fetal	placental	erythroblastosis	hypofibrinogenemia	donees	immigra	ramick	salvadoran	mhpaea
178	mole	retrodeviations	cxtra	enlled	abertion	outcome	vaginofixation	accouchment	unwanted	incest	directive	law	majorities	microcephaly
179	anencephalous	forcÃ©	hydatidiform	gomorrheal	chancroid	vagrancy	quartipara	menticide	thromboembolism	treatment	1uds	brainwashing	depersonalizing	deferrable
180	thesurgeon	haematocele	perforative	stuge	hiess	ovum	appendicitis	oxytocics	isoimmunized	contraceptive	deception	embedment	libertarians	interfacility
181	haveseen	pregnacy	addiction	embolism	scarlet	haselhorst	perium	appendicitis	gestation	antitherapeutic	contraceptives	subtextual	intersex	nonmarital
182	retention	parturient	convietion	corpus	chueco	brucella	miscarried	ovulation	ovular	eviderce	iucd	adopter	chavkin	treatmentlimiting
183	gingivitis	pyometra	eddyite	infeetion	pseudarthrosis	recidivists	illegitimacy	multiparity	abortuses	heterosexuality	surrogacy	contracep	polycystic	jjurisdiction
184	ineident	miscarringes	eelampsia	ocewrred	abusus	concededly	myomectomy	psychosis	death	freudian	ceptive	misconstrues	shame	lactation
185	morrhage	hysteropexy	avoman	dingnosed	hysterotomies	apoplexy	hydramnios	death	galactorrhea	loneliness	miscarriages	criminalizes	thisisnot	patientrelated
186	accident	myoma	tubai	actunl	balard	triplets	multiparity	midtrimester	misearriage	twins	multifetal	reestimating	ethnocentrism	postrelease
187	superinvolution	morphomania	previn	usunlly	threatened	sterilizations	preghancy	hysterectomy	insanity	inseminate	plann	opiophobia	antidiscrimination	underinsurance
188	ceesarean	primipara	pyelonephritis	incomplete	laffont	myomectomy	uterogestation	women	premature	edelin	midwives	glebatis	adoescents	ptd
189	vera	mole	felonious	fatal	vaginofixation	wesselink	misearriage	olitics	expulsions	transfusion	religious	battering	law	fecundability
190	inbor	marriage	amenorrhea	aborted	typhoid	mandelstamm	parturition	vaginitis	illness	antiabortion	women	subfecundity	battering	crosscutting
191	curcttement	appendiceal	exstrophy	hematometra	breech	proscribing	offspring	colpocentesis	ejaculation	nil	amniocenteses	bracton	nondisclosure	viatical
192	sapremia	metritis	marringe	serions	contagion	felonies	neonatal	nancies	malpractice	baby	conceptuses	iud	vbacs	incentivized
193	death	toxemia	misearriage	retrofiexion	varicella	preghancy	psychosis	delay	allylestrenol	chalenges	sex	menopause	dukakis	gestations
194	palliation	superfetation	bigamy	gonorrheic	incarceration	misearriage	neonatorum	heterospecific	inseminations	stigmatizing	incarceration	cohabitation	stalking	prevaence
195	ceesarian	empyema	dpregnancy	pneumonin	hyperthermia	miscarried	fetal	malformation	anovular	induetion	personhood	nhbcds	embarrassment	prespecifying
196	paraplegia	retrodisplaced	didelphys	abusus	varicocele	abuse	unsexing	miscarringes	psychogenic	psychotic	subfecundity	presuit	eugenicist	nonmedicare
197	haemor	miscarringe	stillbirth	trauma	ugon	csesarean	gestational	fetu	proscribing	mistimed	policy	counseling	stimuate	undercounting
198	rÃ©troversion	incarceration	hysteromyomectomy	asphyxin	benthin	dichorionic	placentitis	preg	dichorionic	tellingly	concep	twinning	bagoglu	pacci
199	emotion	miscarried	otitis	hystereurynter	kouwer	dcath	dcath	didache	concep	straint	marital	inresearch	questionsin	semen
200	idiopathic	bicornute	women	septicemin	previa	abetting	miscarringe	contracepion	induetion	miscarrying	twinning	couples	proscriptions	intrainstitutional
