# Supplementary material for: Insights from full-text analyses of the Journal of the American Medical Association and the New England Journal of Medicine
Source: eLife. 2022 Jul 7;11:e72602. doi: 10.7554/eLife.72602 (PMC9262397; doi:10.7554/eLife.72602)
Supplement: Supplementary file 4. [file elife-72602-supp4.xlsx]

## Sheet: abortion
	1810-1819	1820-1829	1830-1839	1840-1849	1850-1859	1860-1869	1870-1879	1880-1889	1890-1899	1900-1909	1910-1919	1920-1929	1930-1939	1940-1949	1950-1959	1960-1969	1970-1979	1980-1989	1990-1999	2000-2009	2010-2019
1	smallpox	miscarriage	miscarriage	premature	miscarriage	criminal	criminal	premature	miscarriage	miscarriage	eetopic	miscarriage	miscarriage	threatened	miscarriage	pregnancy	abortions	abortions	miscarriage	abortions	sterilization
2	infectious	menorrhagia	nursing	uterine	threatened	miscarriage	miscarriage	miscarriage	criminal	tubal	justifiability	ectopic	pregnancy	intrauterine	habitual	septic	pregnancy	miscarriage	abortions	miscarriage	contraception
3	premature	hemorrhages	accouchment	delivery	criminal	lactation	eclampsia	delivery	sepsis	premature	eclampsia	eclampsia	tubal	miscarriage	stillbirth	placentae	contraception	stillbirth	contraception	sterilization	labor
4	eczema	inversion	pregnancy	lactation	inversion	mania	delivery	threatened	premature	ectopic	tubal	eetopic	intrauterine	habitual	placentae	abruptio	euthanasia	pregnancy	legalization	mifepristone	unwanted
5	canine	threatened	menorrhagia	suckling	delivery	threatened	menorrhagia	eclampsia	puerperal	sepsis	divorce	septicemia	placentae	stillbirth	pregnancy	stillbirth	sterilization	infertility	pregnancy	pregnancy	refusal
6	arrest	labor	afterbirth	eclampsia	retention	masturbation	lactation	subinvolution	pregnancy	delivery	postpartum	ablatio	previa	puerperal	tubal	toxemia	amniocentesis	firsttrimester	assisted	stillbirth	abortions
7	recurrence	metastasis	delivery	pravia	resuscitation	suicidal	pregnancy	replacement	eclampsia	pregnancy	intrauterine	previa	pregnaney	toxemia	abortions	labor	fetus	aborted	sterilization	labor	marriage
8	endangered	hemorrhoids	parturient	menorrhagia	failure	menorrhagia	metrorrhagia	pregnancy	tubal	criminal	threatened	accidental	accreta	previa	abruptio	contraception	midtrimester	contraception	mifepristone	legalization	religious
9	contrast	concussion	epistaxis	intussusception	toothache	hysterical	overdose	menorrhagia	endometritis	fetus	miscarriage	postpartum	ectopic	pregnancy	hyperemesis	fetus	unwanted	tubal	unwanted	bendectin	couples
10	trismus	ascites	hemoptysis	dysmenorrhÅ“a	delay	pregnancy	recurrence	pregnaucy	previa	previa	prsevia	toxemia	toxemia	tubal	praevia	abortions	stillbirth	fetus	legal	multifetal	conscience
11	amaurosis	hereditary	afterpains	ulerus	event	dementia	threatened	prÅ“via	subinvolution	menopause	ovulation	stillbirth	postpartum	ectopic	toxemia	intrauterine	insemination	insemination	harassment	misoprostol	intrauterine
12	net	epileptic	aborted	prcevia	recurrence	onanism	asphyxia	secundines	septicemia	eetopic	lactation	placentae	abruptio	eclampsia	increta	menstruation	feticide	pregnancies	embryo	delivery	embryo
13	turkey	dentition	presentiment	foetus	eclampsia	presentation	event	drowning	ectopic	pregnant	parturient	sepsis	eetopic	accreta	gravidarum	polyhydramnios	labor	coitus	labor	unintended	pregnancy
14	resolution	coma	wailed	vaginal	illness	delivery	delay	dysmenorrhÅ“a	vaginitis	prsevia	puerperal	puerperal	bleeding	lactation	postmaturity	amniotic	legal	birth	gridlock	secondtrimester	miscarriage
15	metastasis	haemorrhagy	endangered	presentation	ovum	ovarian	aborted	labor	postpartum	retroflexion	endometritis	asphyxia	hydatidiform	fatality	parturient	puerperal	moral	maternal	suicide	icsi	legal
16	stress	menstruation	suckling	jabor	crime	preevia	marriage	tubal	ovaritis	preguancy	childlessness	inversion	eclampsia	erythroblastosis	afibrinogenemia	pregnant	couples	macrosomia	prolife	tubal	outlawing
17	prolonged	recurrence	seizure	prÅ“via	syncope	dysmenorrhÅ“a	cellulitis	preguancy	accidental	eclampsia	uterinc	spontaneous	ablatio	fetus	previa	delivery	miscarriage	perinatal	prochoice	firsttrimester	reproductive
18	rash	ovarian	event	amenorrhcea	blindness	spontaneous	accidental	coitus	salpingitis	threatened	incarceration	preÃ«clamptic	hemorrhage	placenta	fetus	tubal	disclosure	labor	euthanasia	embryo	stillbirth
19	outlet	failure	minates	amenorrhÅ“a	repetition	millerism	hymen	hasmorrhage	ciesarean	subinvolution	preguancy	parturient	puerperal	infertility	cephalopelvic	uterine	aborted	dystocia	marginalization	vaginal	prochoice
20	presentation	exhaustion	befel	retention	pregnancy	menstruation	pregnant	postpartum	labor	cesarÃ­an	ectopic	prematurity	sepsis	euthanasia	sterilization	menopause	marriage	conceptuses	referendums	fortaleza	infertility
21	fecal	medication	pregnant	pregnancy	prcevia	prÅ“via	syncope	inertia	cÅ“liotomy	labor	rÃ©troversions	tubal	inertia	dystocia	forcÃ©	coitus	intrauterine	pregnant	moral	criminalize	criminalize
22	exfoliation	metastatic	operalion	kousso	lactation	pregnant	heemorrhage	pravia	inertia	aborted	caesarian	toxaemia	stillbirth	spontaneous	preeclampsia	eclampsia	pregnant	eclampsia	tubal	deliveries	euthanasia
23	consciousness	lactation	illness	inversion	drowning	parturient	hemorrhage	embryotomy	preguancy	cÅ“sarian	cÅ“sarian	threatened	premature	dysmenorrhea	contraception	aborted	pregnancies	secondtrimester	physicianassisted	singletons	immigrants
24	incomplete	convalescence	embryo	preevia	unexpected	dentition	seizure	rupture	lactation	extrauterino	prematurity	pregnaney	uterus	prematurity	delivery	miscarriage	placenta	feticide	political	nulligravid	criminal
25	infantum	tetanus	toothache	miscarriage	retroversion	toothache	rupture	previa	coitus	castration	foetus	fetus	delivery	outcome	menorrhagia	marriage	unwed	unwed	delivery	euthanasia	suicide
26	asphyxia	attributes	ovum	carcinoma	heemorrhage	twins	dysmenorrhÅ“a	septicÅ“mia	eetopic	secundines	accidental	criminal	caesarian	postmaturity	intrauterine	amenorrhea	hysterotomy	malformed	infertility	gestations	incarceration
27	extinction	lameness	unremitted	hysteria	reduction	marriage	prcevia	retroflexion	extrauterino	salpingitis	retroversion	caesarian	mole	eetopic	ovulation	previa	secondtrimester	couples	ovulation	assisted	unintended
28	discriminate	atiack	detection	resuscitation	death	eclampsia	foetus	hamiorrhage	delivery	pregnaucy	autosuggestion	placenta	aborted	delivery	hydramnios	eetopic	firsttrimester	toxemia	reproductive	intrauterine	birth
29	enteritis	variola	dealh	hydrocele	parturient	elderly	preevia	parturient	hematocele	endometritis	abortionist	eclamp	spontaneous	sepsis	therapeutic	unwanted	abruptio	gestations	outlawing	pregnancies	crime
30	achilles	mania	hremorrhage	dormientium	attempted	obesity	dentition	ciesarean	threatened	myoma	ciesarean	previas	uterine	pyelitis	labor	lactation	intervention	triploidy	physician	birth	insurance
31	evolution	mumps	anticipation	cornutum	apncea	prcevia	parturient	cellulitis	inversion	vagino	uteri	dystocia	threatened	aborted	disproportion	suicide	legalization	multifetal	conceptus	contraception	prisoners
32	hunger	crisis	hromorrhage	menstruation	trials	hysteria	prÅ“via	eetopic	toxemia	mole	subinvolution	cesarÃ­an	previas	abortions	spontaneous	women	prematurity	midtrimester	legalizing	suicide	threatened
33	passive	paraplegia	biting	leucorrhoea	hysteria	overdose	masturbation	placenta	uteriue	fÅ“tation	primipare	prsevia	placenta	postpartum	hysterotomy	chorioamnionitis	birth	disproportion	feticide	postpartum	eeoc
34	cotyledon	consciousness	hamiorrhage	lithontriptic	cundurango	dormientium	unexpected	inversion	gonorrhea	uteri	dystocia	breech	praevia	fetalis	coitus	uterus	satkewicz	habitual	shadowlands	uterine	preeclampsia
35	parturient	anomalous	cowpock	ulero	purging	deformities	tubal	praivia	fÅ“tation	embryotomy	nidation	cesarian	fetus	praevia	septic	septicemia	prenatal	breech	decriminalization	prochoice	experimentation
36	foetus	hzmorrhage	marriage	masturbation	varicocele	pravia	delayed	intrauterine	pregnaucy	amnesia	praevias	delivery	praevias	uterine	oxytocics	parental	uterus	intrauterine	fertilization	preeclampsia	mandating
37	miscarriage	reaction	coition	hemorrhoids	persistence	habitual	placenta	eraniotomy	metritis	primipare	denial	abruptio	metrorrhagia	uterus	eetopic	sepsis	death	amniocentesis	multifetal	eclampsia	antiabortion
38	policy	illness	recurrence	pregnant	menstruation	triplets	pravia	uterine	adnexa	ciesarean	staleness	intrauterine	salpingitis	neonatal	divorce	spontaneous	criminalize	pregnancics	battered	unsafe	religion
39	type	parturient	intoxication	fetation	dealh	coitus	inertia	lacerations	uterine	cajsarean	embryotomy	arrest	criminal	suicide	accreta	conceptuses	surrogacy	postpartum	secondtrimester	vbac	antidiscrimination
40	deafness	seizure	miscarrying	plÃ¡cenla	guilt	chorea	rabies	hremorrhage	menopause	cacarean	abortions	gonorrhoeal	inversion	menopause	threatened	criminal	conceptuses	cephalopelvic	antiabortion	coital	nondiscrimination
41	prophylactic	hysteritis	aphonia	dentition	coition	outbreak	starvation	intrauterino	dystocia	bicornate	unskillful	pregnancy	bicornate	ovulation	amnesia	previable	fetal	women	criminal	ovulation	prison
42	attributes	amenorrhcea	remission	sÃ©cale	asphyxia	inversion	hysterical	prievia	prÅ“via	placenta	uterine	premature	abortions	disproportion	eclampsia	nidation	conceptus	twinning	capital	outlawing	warn
43	remedial	hematemesis	ulero	levret	vomiting	anomalous	endometritis	septicemia	uremia	praivia	exotic	endometritis	cesarian	menstruation	incarceration	addiction	criminal	euthanasia	botched	botched	governmental
44	peritonitis	nursing	plÃ¡cenla	befel	anesthesia	obstetric	apncea	hajmorrhage	septicÅ“mia	olhausen	arrest	abortions	septic	asphyxia	feticide	asphyxia	pill	parenting	marriage	gemeprost	outlaw
45	anastomosis	chancre	unlil	nymphomania	menorrhagia	insanity	narcosis	ovum	suicide	eraniotomy	pregnaney	postabortal	labor	increta	exsanguination	postmaturity	coitus	infanticide	birth	couples	prep
46	pernicious	afterpains	leucorrhoea	bydatids	hymen	chloroformization	preguancy	ca8e	infanticide	uterine	asphyxia	primipare	menorrhagia	rubella	intervention	vaginitis	unethical	chorioamnionitis	spermicides	nulliparas	undocumented
47	embarrassment	purpura	apprehending	propylamin	dysmenorrhÅ“a	drowning	hcemorrhage	forcÃ©	ovulation	centralis	retrodeviations	puer	forcÃ©	premature	dysmenorrhea	conceptus	maternal	menstruation	parenting	plann	justice
48	urge	relaxation	threatened	spontaneous	disorder	sin	ovulation	uvulotomy	pyosalpinx	masturbation	criminal	abortal	hyperemesis	thyrotoxicosis	praevias	luteum	obstetric	hydrops	pregnancies	iuds	advisories
49	radiation	hasmoptysis	idiot	afterpains	arrest	combat	presentation	ovaritis	peritonitis	ventrofixation	pubiotomy	praevia	luteum	pregnaney	criminal	pyelitis	infanticide	bendectin	stillbirth	macrosomia	unsafe
50	virulence	spasm	ifound	hypercatharsis	preevia	crime	hremorrhage	viburnum	feetation	prÅ“via	inertia	citis	puerperium	pregnant	abruption	parturient	postpartum	lactation	lifesustaining	trimester	postpartum
51	defect	parent	premature	feetus	seizure	ulero	prolapse	criminal	parturient	retroversion	parturition	ofdeath	endometriosis	cesarian	undelivered	hydrops	threatened	singletons	criminalize	iud	emtala
52	failure	transition	hzmorrhage	kiwisch	punishment	cazeaux	septicÅ“mia	uteriue	symphyseotomy	lactation	barrenness	detachment	incomplete	amnesia	infertility	abruption	fetoscopy	divorce	legitimation	cerclage	outsourcing
53	decline	imperforate	protract	parturient	malpractice	tetanus	albuminuria	cÅ“liotomy	vagino	pubiotomy	felonies	subinvolution	ovulation	induced	aborted	intraamniotic	chorioamnionitis	ovulation	couples	spermicides	preconception
54	diagnostic	incontinence	chloroformization	accouchment	millerism	bloodletting	menstruation	sunstroke	justifiability	rÃ©troversions	pregnaucy	eclampsias	rupture	inertia	anticoagulation	threatened	decision	coital	feminism	ooplasmic	homelessness
55	deficiency	repetition	haemorrhagy	gardien	mania	accidental	inversion	prasvia	haematocele	fetation	toxaemia	praevias	endometrium	forcÃ©	infanticide	menorrhagia	trimester	prematurity	punishment	prepregnancy	dtca
56	perforations	chorea	primapara	lilhotrity	constipation	cundurango	dealh	sepsis	peritouitis	justifiability	cÅ“liotomy	bacteriemia	coitus	ablatio	placenta	shock	coital	fertilization	surrogacy	childbirth	minors
57	suggestion	development	attendedwith	septicÅ“mia	intoxication	decline	crime	operationof	amenorrhea	ovulation	anteposed	pregnant	eesarean	javert	nonpreventable	law	amniotic	mistimed	satkewicz	mistimed	fdama
58	sweating	epilepsy	epileptic	toothache	spontaneous	childhood	tetanus	hydatiform	rupture	cÅ“sarean	previa	ruptured	prolapse	hydramnios	suicide	hydramnios	minors	sterilization	denial	laparoscopically	assisted
59	endemic	accouchment	hallucination	acupuncturation	dent	dealh	triplets	hamorrhage	fetation	oÃ¶phorectomy	secundines	rupture	separation	chorionepithelioma	secundines	dystocia	rearing	parental	religious	crime	perinatal
60	abuse	htemoptysis	sickens	heemorrhage	retained	aphasia	dysmenorrhcea	fÅ“tation	uremic	primiparse	eriminal	incomplete	pregnant	neonatorum	premature	preguancy	childlessness	spermicides	apartheid	conjoined	vec
61	wandering	premature	deaih	fetus	sickness	foetus	insanity	metrorrhagia	ca8e	trachelorrhaphy	menorrhagia	cattle	preÃ«clamptic	arsenotherapy	rational	unwed	amniocenteses	childrearing	decriminalized	ivf	icsi
62	vesicular	overdose	unsubdued	chorea	remission	hydrocephalus	peritonitis	mutilation	hydatiform	forcÃ©	wilful	abor	chorionepithelioma	praevias	kernicterus	postabortal	policy	varicocelectomy	insemination	infanticide	fetus
63	granulation	hcemorrhage	inertia	chloroformization	onset	cellulitis	cessation	coition	fetus	dystocia	premature	hydramnion	myomectomy	separation	menstruation	vaginal	postmaturity	preeclampsia	fortaleza	legalized	punishment
64	crisis	hemiplegia	htemoptysis	leucorrhcea	rupture	unexpected	coition	preguaucy	prostitution	prievia	catastrophy	apoplexy	cesarÃ­an	sequelae	percreta	crime	edelin	deliveries	misoprostol	criminal	twins
65	perception	hemoptysis	pravia	ascites	coitus	ctherization	hysteritis	prsevia	appendicitis	haematocele	infanticide	mole	preeclampsia	menorrhagia	ergotism	anticoagulation	ethics	offspring	policy	minors	obamacare
66	guilt	iritis	resuscitation	dealh	hemoptysis	rabies	menopause	resuscitation	retroflexion	uremia	cajsarean	prolapse	dystocia	postmenopausal	outcome	criminalize	placentae	gravidas	assiut	ssris	denial
67	herpetic	phlebitis	lactation	hematemesis	lithontriptic	ulerine	remission	malpractice	uterino	postpartum	uteriue	pyelitis	toxemias	labor	malpresentation	selfinduced	offspring	noncoital	acculturation	interpregnancy	repealing
68	ulcerating	cessation	lithontriptic	cephalotribe	delayed	dysmenorrhcea	exhaustion	asthenia	preguaucy	pravia	eurettage	swine	eclampsias	hemorrhage	prematurity	childbirth	outlawing	monochorionic	childrearing	abruption	mhealth
69	precursor	event	hooding	narcosis	hemorrhage	recurrence	cystitis	menopause	malpractice	endomctritis	menopause	fibromyomata	parturient	infanticide	thromboembolism	inertia	septic	mothers	social	livebirth	referendums
70	delusion	hydrothorax	heemorrhage	feetation	deformity	offspring	ovum	peritonitis	praivia	hemophilia	coitus	fatality	neonatal	criminal	arsenotherapy	postpartum	toxemia	illegitimacy	fetaltissue	reproductive	mining
71	lew	leucorrhoea	unavailingly	unavailingly	imprudence	guilt	imperforate	heemorrhage	uterus	menstruation	unconsidered	bicornate	accouchement	toxemias	curettages	placenta	nontherapeutic	clective	coital	coitus	noncompliance
72	fumigation	deaih	catameuia	uleri	crisis	intoxication	detachment	justifiability	ovum	ca8e	cÅ“sarean	justifiability	faral	sterilization	ectopic	puberty	sterilizations	asphyxia	nonvoluntary	illegal	bans
73	capillaries	scrophulous	signal	cessation	ansesthetic	apncea	hÅ“morrhage	extrauterino	tousillar	prolapse	eclampsias	forcÃ©	extrauterine	breech	accouchement	birth	directive	marriage	bioethical	legal	marketplaces
74	uncertainty	hysterical	bufferings	hcemorrhage	williams	ansesthetic	lymphangitis	accouchement	decidua	miscarrying	spaying	lactation	ovum	percreta	pregnancies	increta	infertility	uterine	dowbiggin	killings	stigma
75	recurrent	dealh	repented	ctherization	cessation	attributes	urethritis	cervix	prasvia	ovarian	preguaucy	twins	habitual	nonobstetric	javert	ovulation	maturely	surrogate	women	nulliparous	stigmatization
76	remission	traumatic	jabor	finement	protract	labor	onanism	transfusion	symphysiotomy	feetation	deportation	foetus	conservative	decidua	extramarital	failure	eclampsia	anencephaly	conflates	twinning	fdaaa
77	reaction	dysmenorrhÅ“a	fondled	lcucorrhÅ“a	leucorrhcea	ague	feetation	haematocele	mole	hÃ¦morrhage	metrorrhagia	streptococcal	procrastination	unexplained	unpreventable	exsanguination	surrogate	stillbirths	disputes	referendums	legalization
78	willis	conlinued	hazmorrhage	mania	replacement	innominatus	apnÅ“a	fetation	cÅ“sarian	fibromyomata	pregnant	papyraceous	prsevia	attempted	hydatidiform	infanticide	denial	liveborn	hippocratic	subfertility	coverage
79	illusions	trismus	cataleptic	intoxication	placenta	satyriasis	chloroformization	recurrence	aborted	lacerations	fibromyomata	labor	rongy	cclampsia	procrastination	insemination	catastrophic	spontaneous	obstetrics	underreporting	payouts
80	discoloration	suckling	vomiling	vectis	onanism	dysmenorrheea	hÅ“matocele	menstruation	crime	coition	pregnancy	separation	foetus	addiction	unindicated	rumination	twinning	embryo	illegal	lactation	ovulation
81	habitual	jaundice	catamcnia	hemiplegia	chloroformization	abuse	ulero	dysmenorrhcea	anteflexion	menorrhagia	vagino	eurettage	fibromyomata	malpresentation	postpartum	prsevia	nontreatment	acephalic	embroiled	vacuumassisted	vicp
82	hemiplegia	hazmorrhage	uniil	delay	glossitis	albuminuria	seizures	aborted	cellulitis	caesarian	ventrofixation	neonatal	menopause	abortifacient	casss	candidiasis	coercive	vaginal	bendectin	dizygotic	mifeprex
83	sexual	animi	crisis	tetanus	suicidal	epileptic	arrest	hypnosis	prievia	rupture	accretas	perium	amenorrhea	forlowep	marriage	castration	placental	fetal	nondirective	fertilization	law
84	happiness	hemorrhage	continved	unremitted	marriage	complications	retroversion	elytrotomy	cystitis	retroposition	placental	cesareans	pyelitis	illegitimacy	overdose	breech	eetopic	premature	menopause	santorum	moral
85	fatality	critical	pregnaucy	puzos	dangerous	nymphomania	pyzmia	septicasmia	eudometritis	arrest	deception	uterus	ruptured	preÃ«clamptic	uterine	outcome	counseling	superfecundation	homophobia	parity	23andme
86	anomalous	delivium	palien	hzemorrhage	ovarian	transfusion	fÅ“tation	afterpains	cajsarean	inertia	reasous	ovular	miscar	cervix	followep	choriocarcinoma	stereotyping	obstetric	menstruation	ssri	childbirth
87	dislocations	epidemics	phlebotomy	haemorrhagy	immediate	delayed	suicidal	endometrium	hasmorrhage	uterus	pravia	pravia	supravaginal	placentae	mastitis	corpus	natal	cryptorchidism	deception	cytotec	pregnant
88	delay	remission	convalescence	defect	excessive	selectedpapers	prievia	vagino	spontaneous	asphyxia	primiparse	uterine	papyraceous	prsevia	erythroblastosis	endometrial	semen	trimester	worldviews	prelabor	statutorily
89	wasting	ifound	menstruation	coition	apnÅ“a	prevention	metastasis	eudometritis	endomctritis	cÅ“liotomy	ovaritis	hysterotomy	hysterotomy	abruptio	abstinence	cannabis	accreta	legalization	kandall	midtrimester	dshea
90	frenum	onset	endeavours	nursing	aborted	melioration	fetation	feetation	rÃ©troversions	perimetritis	unfruitful	oÃ¶phorectomy	trachelorrhaphy	impotence	rupture	rubella	fetuses	gravidity	reframing	singleton	marijuana
91	deformity	somnambulism	ctherization	wiihout	reaction	naturo	aphonia	suicidal	pravia	hysteropexy	coition	intervention	prematurity	hyperthermia	asphyxia	mycoplasma	artificial	inseminations	medicalization	refusal	ehbs
92	transfusion	pregnancy	tiiat	baynton	detection	sexual	labor	accident	caaea	eudometritis	shellshock	myomectomies	peritonitis	encephalopathy	rubella	undelivered	zygote	postabortion	victimization	noncoital	smokefree
93	movement	delivery	whai	hydrocephalus	falal	pictonum	traumatic	hiemorrhage	syncope	uteriue	punishment	menopause	forlowep	mole	mole	prenatal	parents	fetuses	revisits	breastfeed	singletons
94	occupations	sciatica	septicÅ“mia	apncea	intussusception	asphyxia	placcntal	cÅ“sarian	foetus	hydatidiform	extrauterino	placental	plasmaphaeresis	abruption	sepsis	parturition	ethical	preembryonic	immigrants	undocumented	larc
95	asparagus	catharsis	frights	antiseptic	ctherization	septicÅ“mia	lacerations	operalion	salpinx	ovaritis	motiveless	sterilization	endometritis	agranulocytosis	pregnaney	euthanasia	suicide	fetoscopy	nulliparas	preembryonic	340b
96	signal	hajmorrhage	dysmenorrhÅ“a	dendy	inhalation	syncope	malformation	lnemorrhage	abortionist	elytrotomy	possibilityof	ceesarean	contraception	nonobstetrical	cÅ“sarian	neonatal	abor	quintuplets	menorrhagia	attempted	birthing
97	distemper	pneumonic	aftei	faetus	catharsis	refusal	chorea	hcemorrhage	luparotomy	exploratory	retroversions	secundines	abortionist	progesterone	embolism	acute	childrearing	hyperemesis	outlaw	marriage	rollout
98	emotion	rash	premonitions	malpractice	hemorrhoids	colic	coitus	cessation	placenta	twins	eraniotomy	megacolon	accretas	birth	lactation	institutionalized	experimentation	multiparity	muddling	abortifacient	warranties
99	pneumonic	gangrene	eyraud	ovarian	hremorrhage	displacement	intussusception	starvation	seizure	gonorrhea	electrocution	placentac	menstruation	eclamptogenic	praivia	puerperium	women	oligospermia	specialty	dshea	disputes
100	prognosis	attendedwith	atiack	castration	somnambulism	failure	resuscitation	intervention	dysmenorrhÅ“a	preÃ«clamptic	malpraxis	white2	cervix	incomplete	episiotomies	toxoplasmosis	outcome	trisomy	imperialism	conceptus	parental
101	visceral	controlled	hzemorrhage	cundurango	flow	extinction	anomalous	counselled	lnemorrhage	urethritis	eleath	colpotomy	ceesarean	cesarÃ­an	preguancy	peritonitis	delivery	conceptus	preconception	outlaw	macra
102	rigor	incomplete	procrastinated	bilateral	pernicious	acephalous	cundurango	hallucination	pyzmia	undelivered	unsexed	embolism	postabortal	accidental	superfetation	couples	preabortion	delivery	voth	feticide	lgbt
103	diurnal	opthalmia	vitalia	narcotic	epilepsia	parent	pyÅ“mia	commitment	septicasmia	paramÃ©trais	premeditated	increta	increta	previas	forlowep	apoplexy	divorce	oligohydramnios	doctorpatient	assiut	cooperatives
104	esophagus	retention	kinepock	lethargy	hypercatharsis	blindness	pelvic	abortionist	hremorrhage	parturient	retroflexion	forlowep	praivia	endometriosis	cajsarean	psychosis	reform	infant	relativism	dystocia	implementation
105	haemorrhagy	influenza	preguancy	dysmenorrheea	fatal	anasthetics	praivia	salpiugitis	embryotomy	duhrssen	excisiou	resuscitation	primipare	placentac	placental	ablatio	nondirective	conjoined	crime	tocolysis	transgender
106	quack	presentation	leucorrhcea	hremorrhage	emetics	bucknill	pericarditis	salpingitis	cabe	pyosalpinx	postoperative	ciesarean	mutilation	prophylactic	prsevia	initiation	metaphysical	abruption	noncoital	superovulation	preemption
107	idiopathic	ischuria	forseveral	somnambulism	asthmatic	onset	hzmorrhage	urethritis	psychosis	septicÅ“mia	fornication	prostatovesiculitis	pregnaucy	fatal	nidation	bacteremia	foreclose	vacuumassisted	aborted	hyperstimulation	aca
108	palliative	reality	afierwards	repented	septicÅ“mia	dolbeau	spontaneous	caesarian	ovarian	hebosteotomy	charucter	sapremia	suicide	nidation	harm	illegitimacy	menstruation	fecundability	intergenerational	maternal	ltss
109	menstruation	prophylactic	phlebitis	hymen	sin	neurasthenia	shock	haemorrhagy	perimetritis	csesarean	amenorrhea	ileus	caesarean	primipare	vaginal	infertility	legality	postdate	socictal	preempts	preempts
110	sedentary	adverse	cessation	asphyxia	plÃ¡cenla	previa	punishment	abuse	incarceration	breech	mismanagement	eradication	unsafe	postabortion	omentumectomy	gastroenteritis	outlaw	nulligravid	homosexuality	antiabortion	daca
111	envelope	asphyxia	unexpected	rupture	propylamin	existenco	leucorrhcea	intoxication	tamponade	increta	commitment	aborted	breech	postabortal	abortifacient	hydatidiform	desirability	fetalis	firsttrimester	incarceration	biobanks
112	disgust	seizures	quinsies	enemala	labor	facls	amenorrhÅ“a	cajsarean	suicidal	hematocele	wrongful	hydrocephalus	abor	intervention	nonobstetrical	ruptured	refusal	abruptio	unintended	perinat	botched
113	disgorgement	unexpected	ainnii	gonorrhÅ“a	abandoned	intractable	urethral	pregnant	asphyxia	torsions	erime	unskillful	cesareans	hypoglycemia	primipare	habituation	vaccination	refusal	legitimizing	mifeprex	severability
114	displacement	absence	intervention	depletives	detachment	headaches	complications	foetus	iufection	salpiugitis	natureof	rongy	secundines	amenorrhea	miscarriages	percreta	conscience	discordancy	nazism	infertility	malpractice
115	unconscious	scrophula	periodic	cowpock	bleeding	latency	outbreak	unexplained	habitual	intussusception	procrastination	procrastination	cajsarean	followep	pneumothorax	endometritis	cornual	baby	masturbation	preemption	legislatively
116	concussion	ulerus	sulfered	occlusion	hemorrhagic	barbarity	pertussis	endomctritis	questiou	dysmenorrhÅ“a	cacarean	extrauterino	outcome	insanity	pregnant	insanity	impermissible	nonobstetrical	nonreligious	noncephalic	victims
117	anomaly	vomiling	molimen	acephalous	fatuity	impolicy	existenco	asphyxia	divorce	outcome	rearing	ectopie	multipara	toxaemia	unskillfully	therapeutic	orgasm	reproductive	diplomacy	noncompliance	mistimed
118	malformation	transfusion	attack	uterus	puberty	prolapse	typhlitis	ceesarean	coition	pneumothorax	maiming	midwives	estrin	castration	cÅ“sarean	foetalis	wastage	polyhydramnios	feminist	medically	chipra
119	dislocation	narcotic	operationof	rickets	twins	vaginismus	hydatiform	miscarrying	septicaemia	postoperative	antisocial	peritonitis	colpotomy	ruptured	pravia	papyraceous	imprinting	1uds	objectification	triplets	statebased
120	corona	carbuncle	leucorrheea	perturbating	anceps	gardien	hasmorrhage	vectis	secundines	preguaucy	impolicy	fatal	appendicitis	neurosis	arrhythmia	fetal	abruption	bereavement	pregnant	eeoc	iuds
121	unsafe	crgot	leucorrhÅ“al	inhalation	hromorrhage	thi3	jabor	cÅ“sarean	ophthalmia	metrorrhagia	eugenists	trachelorrhaphy	lactation	fetal	electroconvulsive	reproductive	tubal	nonreassuring	norplant	multiparas	hitech
122	nocturnal	passive	anattack	operalion	insanity	cruvelhier	phrenitis	prcevia	unemia	accidental	castration	castration	salpingectomy	foetalis	nonobstetric	illegitimately	dizygotic	spina	exceptionalism	dtca	hipc
123	epistaxis	palliative	prcevia	gene	cowpock	transitoria	drowning	symphysiotomy	thebe	asthenia	csesarean	disproportion	acute	prenatal	suicidal	conflict	justifiability	gamete	vaginal	decriminalization	lawyers
124	suicide	operating	anolher	hÅ“matocele	procedures	delusion	delusional	cceliotomy	hemorrhage	theuterus	allergy	abortionist	feetation	chorioepithelioma	bleeding	crisis	wrongful	placentae	prenatal	nulliparity	viders
125	dentition	befel	awoman	ulerine	injury	chlorosis	hysteria	exhaustion	atresia	foetation	myoma	appendicitis	parturition	maternal	prophylactic	abortal	prejudice	gender	unwed	outsourcing	waivers
126	pharynx	hremorrhage	delusion	aconitum	narcotism	magendic	interview	unexpected	operatiou	seconel	praivia	epididymotomy	crisis	psychogenic	cesarian	ovulating	adultery	birthing	nulligravid	payor	challengers
127	control	visceral	recommencing	varicocele	dormientium	cowpox	puberty	trauma	metrorrhagia	curettement	abetting	compliance	corpus	thromboembolism	ablatio	necrosum	divorcing	malpresentation	mistimed	chorioamnionitis	issuers
128	sign	tiiat	physicked	epileptic	bloodletting	placenta	leucorrhoea	luemorrhage	conditiou	accouchement	forcÃ©	orchitis	asphyxia	bicornuate	varicocelectomy	perinatal	baby	preconceptional	killings	acculturation	braindeath
129	misconception	laryngea	conlinued	birth	pravia	reprobates	intractable	hzmorrhage	hÅ“matocele	prasvia	aeapnia	studdiford	disproportion	cephalopelvic	eesarean	guffaws	liberalization	inseminated	ideological	cesarean	encryption
130	scurvy	sudden	obesity	fistula	lobelia	amenorrhcea	related	hÃ¦morrhage	prolapse	eurettage	rupture	appendieitis	nonobstetric	delay	adenomyosis	twinning	definitional	anembryonic	activist	marijuana	medically
131	fold	excessive	orfour	melioration	hydrocelc	syphilization	anuria	aspirations	accouchement	cystocele	decidua	ventrofixation	birth	embolism	trachelorrhaphy	prematurity	rubella	legal	superovulation	law	empowerment
132	laryngeal	toothach	magnetizer	hemorrhages	innominatus	waul	precocious	eclampsin	uvulotomy	coitus	ngainst	cystoceles	cÅ“sarian	eesarean	multiparity	accidental	spontaneous	iuds	infanticide	stupak	ehb
133	flu	drowning	unfavourably	incontinence	unconsciousness	starvation	jaundice	incarceration	dysmenorrhcea	praevia	mating	percreta	nullipara	eclamptic	disclosure	incarceration	legalized	nulliparas	paternalism	unwanted	breech
134	galvanic	operalion	agnin	hysteritis	foetus	quilo	hamiorrhage	catharsis	typhlitis	primapara	unfaithfulness	toxemias	postmenopausal	preg	metrorrhagia	aplastic	inseminations	postneonatal	decriminalizing	postterm	dissatisfaction
135	empirical	prevention	gardien	hemorrhage	diagnosed	enormities	refusal	symphyseotomy	amaurosis	praevias	mastitis	mcglinn	cacarean	ovarian	death	cervix	malformed	natal	conflating	twins	afghan
136	diabetes	pictonum	crgot	susceptio	chorea	pyzmia	anteversion	amenorrhÅ“a	amnesia	ectopie	miscarrying	followep	primapara	eclampsias	previas	orchitis	therapeutic	primiparity	insanity	domestic	unplanned
137	spasm	secondary	talcing	poisoning	malignancy	storks	molimen	hicmorrhage	senile	tonitis	ovular	empyaema	hydramnios	anomaly	separation	pyelonephritis	illegal	fertility	sociopolitical	stillbirths	ivf
138	constriction	eruptions	inimitÃ©s	vermifuge	feloniously	perturbating	hicmorrhage	leucorrhoea	utorine	mutilation	selfinduced	cÅ“sarian	chorion	cure	insemination	transplacental	preconceptional	matemal	religion	superfecundation	middleincome
139	focal	ileus	siill	chloroform	operationof	repetition	urÅ“mic	hÅ“morrhage	prsevia	uterino	delivery	inertia	fatal	selfinduced	anuria	post	menopause	exsanguination	santorum	overreporting	obstetric
140	natient	yvhich	catainenia	satyriasis	hysterical	toxicophagi	impalement	transition	intrauterino	marriage	criminally	reporteel	obstetric	unexpected	reprehensible	overripeness	implementation	cesarean	coercive	fecundability	rfra
141	gastritis	unfavourably	fancying	preguancy	paraplegia	heemorrhage	bloodletting	excisiou	disaster	retrodisplacements	release	septicaemia	endometrial	marriage	prievia	unexpected	blastocyst	unwanted	eurasia	postdate	citizen
142	ague	malignancy	mercurialization	discutients	uncertainty	poisoning	epileptic	uterus	septic	metritis	guilt	bicornuate	castration	offspring	ficais	pneumothorax	attitude	childlessness	flirtation	amniotomy	breastfeed
143	conjoined	primapara	paticut	antirritant	sexual	metastasis	hromorrhage	ventrofixation	insanity	diihrssen	carclessness	metrorrhagia	accidental	psychosis	selfinduced	mothers	sexist	decriminalization	contentious	fetal	policy
144	threatened	headachs	fasting	crie	fortÃºnale	hysteritis	induced	deprivation	induced	forlowep	terrors	exploratory	cÅ“sarean	multiparity	hemopneumothorax	teratologic	gruzalski	precclampsia	sexuality	menopause	abstinence
145	intoxication	secale	presentation	ansesthetic	exasperate	pernicious	dysmenorrheea	haunorrhage	foetation	multÃ­para	luteum	rabies	multiparae	appendicitis	childlessness	death	guilt	death	interpregnancy	abstinence	nonsmokers
146	spur	radical	taxis	gelsemin	shock	syphilisation	medication	suicide	salpiugitis	intrauterine	suicide	pyzmia	panhysterectomy	omentumectomy	procrastinating	stilbesterol	unborn	botched	prelabor	mandating	unenforceable
147	contaminated	predisposition	finement	witliout	mutilation	fatality	crisis	dropsy	pyaemia	anteflexion	primiparÅ“	vagina	a38	hydatidiform	accretas	childlessness	nonconsenting	superovulation	entrepreneurialism	accreta	pchrs
148	cramp	hamiorrhage	witliout	forwhich	cumulative	hydrocelc	excessive	agoraphobia	haunorrhage	uremic	electrocuted	silicosis	divorce	luteum	perinatal	epizootic	gravidas	menopause	foreclose	clopramide	fordable
149	transition	peritonitis	mysclf	hydrocelc	suppuration	recantation	occlusion	operatiou	hiemorrhage	amenorrhea	mutilation	salpingitis	hematometra	endometrium	postabortal	disclosure	nonvoluntary	incest	apocalyptic	hfea	reframing
150	strain	antiphlogistically	thatshe	napellus	carcinoma	adverting	hajmorrhage	hooding	complications	multigravida	lynching	juvenile	fibromyoma	obesity	cesarÃ­an	superinfection	fathering	criminalize	hgp	contracept	disruptive
151	unfavourably	chickenpox	vesicatory	dysmenorrhcea	thi3	immoralities	catharsis	uteri	eclampsin	fibromyoma	carnal	cÅ“liotomy	justifiability	bicornate	neonatal	copulation	fatherhood	childbirths	compellingly	oralcontraceptive	empowers
152	community	insanity	procceded	hzmorrhage	operalion	malpractice	repetition	mania	decapitation	hamiorrhage	prostitution	menorrhagia	myomectomies	motherliness	resuscitation	reform	morality	chorionicvillus	antitobacco	firearmrelated	phas
153	immersion	typhoid	overjoyed	mothers	impotence	pyÅ“mia	epididymitis	accidental	ventrofixation	incarceration	blighted	praivia	undelivered	anembryonic	phlebotomy	tripronucleate	commitment	fathering	malpractice	fircarms	riskbased
154	bodily	catamcnia	mania	anomaly	orchitis	legal	relaxation	validity	parturition	ctesarean	endangered	hemorrhage	preg	metropathia	preÃ«clamptic	ovum	emotional	amniotomy	mutilation	anembryonic	reconfigured
155	mania	purging	11er	anwsthetic	empirical	mutilation	epilepsy	diagnosed	haimorrhage	pregnaney	fecundation	fÅ“tation	eurettage	cessation	ceesarean	bacteriuria	dalkon	surrogacy	stigmatizing	teratology	prescriptiondrug
156	infantile	auxiliaries	release	bite	metrorrhagia	anteversion	ctherization	dentition	followiug	dysmenorrhcea	preÃ«clamptic	hysteropexy	hypoglycemia	parturition	tamponade	decapitation	preeclampsia	sexism	rearing	endometrial	medicaid
157	buf	rickets	irrecoverably	seizure	enemala	critical	nymphomania	castration	suddeu	recurrence	metritis	endocervicitis	fimbriae	arrhythmia	pubiotomy	ovarian	botched	ivf	adolescent	disputes	singleembryo
158	electric	salivating	delayed	secale	suckling	licentiousness	onset	preevia	trauma	cervix	anembryonic	possibilityof	oÃ¶phorectomy	accouchement	clicit	psychotic	isoimmunization	amniocenteses	personhood	unplanned	postapproval
159	interrogative	agitation	detachment	bealthy	anticipation	befel	eetopic	hysteritis	hydrocephalus	intervention	metrorrhagias	coav	cystocele	missed	placentac	hypofibrinogenemia	prochoice	dizygotic	autonomy	liveborn	grounded
160	drive	sweating	clone	twins	peritonitis	seizure	illness	septiceemia	aute	eclamp	preventible	fetal	pracenta	vaginal	pregnaucy	offspring	abortionist	multigravid	intercourse	acephalic	pdmps
161	relaxation	momentary	drowning	rubefacient	unavailingly	midwives	poisoning	pyasmia	epilopsy	subiuvolution	trachelorrhaphy	phlebitis	apoplexy	ceesarean	menopause	phlebitis	procreation	bifida	lgbt	pregnancyrelated	grandfathered
162	dual	effusions	defalcation	millerism	combat	liavo	habitual	primapara	thib	empyaema	fetus	marriage	ciesarean	conceptuses	hydrops	postmature	justifications	quadruplet	devalues	states3	multifetal
163	eating	deafness	disorganizations	retroversio	hamorrhage	jabor	trials	unconsciousness	hcemorrhage	symphysiotomy	inoculative	caesarean	lacerations	apoplexy	hypofibrinogenemia	oliguria	uterine	adolescent	championing	rrv	antidepressant
164	malignancy	operationof	quelled	gonorrhcea	unremitted	deception	haamorrhage	spontaneous	hymen	subinvoluted	remÃ³le	immunization	infection	narcoanalysis	myomectomy	nonobstetrical	mainstreaming	frozenembryo	unconvincingly	preabortion	secondtrimester
165	ephemeral	marriage	patieni	compression	ciously	operationof	tolerance	hÅ“matocele	arrest	retroflexions	thediagnosis	vagino	nidation	therapeutic	isoimmunization	suicidal	inhumane	previa	undocumented	puerperal	pdrp
166	lesions	enteric	tetanus	atiack	alliance	malignancy	abuse	tousillar	sudden	retrodeviations	appendieitis	uteri	sterility	praivia	pyometrium	polyspermy	rapist	abortuses	exhibitionism	breyer	applicants
167	decision	nil	secundines	anaphrodisiac	hicmorrhage	gallard	malignancy	endometritis	malignancy	delay	retrodisplacement	cajsarean	induced	papyraceous	jewert	triploidy	perinatal	neonatal	devolution	terventions	offlabel
168	chorea	scurvy	blindness	punishment	hzemorrhage	conclusivo	prolonged	cesarÃ­an	torsion	exhaustion	intervention	alien	ventrofixation	malingering	consensus	intervention	personhood	gravidarum	humanrights	offlabel	foreclose
169	combat	poverty	hersell	amenorrheea	previa	panic	uterine	metritis	cÅ“sarean	peritonitis	unskilfulness	bites	curettage	disorder	amenorrhea	sexually	coerced	crime	questing	conflates	enacts
170	regulation	sexual	cathetcrism	onanism	immediale	leuret	operalion	aute	perforation	mackenrodt	retrodisplacements	primigravidae	caesareans	arrest	luteum	chorioadenoma	religious	stillborns	law	quadruplets	harassment
171	youth	quinsies	amenorrhcea	falal	penally	abstinence	varicocele	cranioclast	excisiou	spontaneous	aute	septicasmia	perium	contraception	ciesarean	ovular	singletons	outcome	plann	unwed	costcontrol
172	somnambulism	schirrous	hysteritis	unconsciousness	selectedpapers	falal	intoxication	masturbation	pregnant	retroversions	condign	refractory	citis	casss	succenturiate	anembryonic	rupture	nontreatment	curiae	higherorder	electoral
173	adjustment	transient	palliation	anassthetic	conduct	baumes	asthenia	trachelorrhaphy	tetany	hemorrhage	iridocyclitis	beptic	sterilization	probability	premeditated	endometrium	clective	nondisjunction	amici	satkewicz	biosimilar
174	chancre	contusions	hÅ“moptysis	infant	evolution	lizars	disorganizations	cuuse	mania	theplacenta	intrauterino	doederlein	primiparae	infant	dystocia	asepsis	braindeath	iud	abor	progesterone	delivery
175	aponeurosis	cachectic	instanter	prievia	toxicodendron	rase	replacement	event	retrodeviations	uterinc	pollutions	splenotomy	appendieitis	scurvy	justifiability	parotitis	dissent	nondirective	coercion	nonobstetrical	highdeductible
176	theday	birth	controlled	pictonum	befel	infanticide	amaurosis	Å“sophagotomy	preevia	hydatiform	unpreventable	feetation	vaginitis	sexual	pneumoperitoneum	mating	narcotic	directive	niddah	endometriosis	hfea
177	sayingthat	prolonged	thechild	hinchman	rage	pericarditis	hsemorrhage	blighted	chrouic	ruptured	linds	contagious	meigs	otosclerosis	amniotic	rearing	uncertainty	minors	blackmun	previa	seeking
178	predisposition	decline	flays	ptyalism	withdrawal	hÅ“matocele	aute	barrier	precocious	myomectomy	theplacenta	undelivered	quadruplet	peritonitis	refusal	nancies	parental	tripronucleate	envisioning	kamisar	administrative
179	exhaustion	asthmatic	keratonyxis	crgot	hzmorrhage	iere	satyriasis	perimetritis	hydatidiform	uvulotomy	asseverations	preevia	hydramnion	cryptorchidism	clective	endometriosis	cesarean	drinking	ageism	refusals	directive
180	disproportion	eclampsia	pertinacious	ferox	ascites	tertiary	befel	retroversion	caube	septicemia	maternities	electrocution	detachment	fibromyomata	fetalis	fullterm	overturns	intervention	divorcing	justice	refusals
181	pathologists	childhood	thi3	vcratrum	mysclf	experimentation	thi3	pyzmia	forcÃ©	puerperia	feetation	asphyxiai	poisoning	apnea	childbirths	hypopituitarism	law	sexuality	laparoscopically	punishment	counselors
182	stimulation	harrassed	fortÃºnale	hazmorrhage	hysteritis	witliout	hÅ“moptysis	praevia	retroversions	adolescent	deadliness	ectopics	febrile	secundines	caesareanized	pelvic	device	placental	birthing	monozygotic	nonexpansion
183	gouty	sthenic	theplacenta	relaxation	restell	endangered	millerism	plÃ¡cenla	septiceemia	richelot	malingering	accreta	subinvolution	pneumoperitoneum	redigitalization	withdrawal	attack	newborn	aspirations	aneuploidy	heroin
184	hippocratic	peripneumony	hasmorrhage	chossat	finement	regurd	extrauterino	ovulation	delusion	flexions	unreasonableness	coitus	gonorrhea	subinvolution	imbalance	parolees	legalize	singleembryo	legalized	breech	needleexchange
185	tinea	constipation	prievia	admeasurements	metastasis	homoeopathist	subinvolution	deception	punishment	malformed	migration	nonobstetric	desatnick	bleeding	conceptus	satkewicz	eugenic	malformation	sexist	coverage	housing
186	chocked	resuscitation	hersclf	uterinc	anÅ“sthetic	apnÅ“a	uterinc	fecundation	flexions	eleath	mishandling	plasmaphaeresis	pituitrin	malformations	retroflexion	pseudopregnancy	harassment	noncephalic	lactation	singleembryo	forcement
187	galen	disabled	hemorrhages	anemia	arthritis	puzos	cadaver	infanticide	puer	septicasmia	halfhearted	parturition	postmaturity	erysipelas	abor	postabortion	guffaws	intraamniotic	contestable	decriminalizing	nqf
188	insect	assisted	hajmorrhage	operationfor	masturbation	rickets	plÃ¡cenla	afterbirth	refusal	retroposed	sequelai	suicide	empyema	extrauterine	multipara	epilepticus	religion	remarriage	maternalfetal	spontaneous	ncvia
189	delayed	courage	headaches	selectedpapers	ulerus	graves	impaction	foetation	appeudicitis	excisiou	inexpediency	curettement	uterotubogram	frigidity	attrition	uncoagulable	breakthrough	preabortion	flouted	efit	parity
190	factitious	melioration	suicidal	epistaxis	rejection	incomplete	theplacenta	theplacenta	alcoholism	anuria	cholelithiasis	mastoiditis	interruptus	preeclampsia	deatr	primipare	certificateof	postterm	fathering	childlessness	parenting
191	confusion	solitary	thistime	hemoptysis	anteversion	disorganizations	consolidation	haiinorrhage	auother	umbilical	endomctritis	ovum	percreta	decision	painrelieving	prison	parturition	hysterotomy	eeoc	polydrug	divorcing
192	curve	poisoning	cuuse	marriage	prÅ“via	amenorrhÅ“a	hamorrhage	luparotomy	suid	plÃ¡cenla	malefactors	adenomyoma	ovular	rupture	sequelae	masculinization	criminally	adultery	overturns	efits	bursement
193	inert	septicÅ“mia	lher	scarificator	kerosolene	crisis	uteri	rÃ©troversions	gouorrheal	hydrocephalus	torsions	goats	hydatiform	puerperium	unfor	anovulatory	decriminalized	pregnancyrelated	stigmatization	accidental	multistakeholder
194	cuuse	menstruous	lilhotrity	cuuse	accouchment	mesmerism	pregnaucy	htemorrhage	hystero	salpinx	slovenliness	induced	gestational	consensus	unexpected	gestations	institutionalize	prepregnant	disclosure	unethical	devolution
195	eustachian	tic	panic	anastomosis	exophthalmos	isambert	hÅ“matemesis	cassarean	retroversion	suspensio	dyscrasic	typhilitis	omentumectomy	estrogen	gestational	marijuana	remedial	quadruplets	ethics	fdama	firsttrimester
196	reserve	recession	mortis	operationof	interpretation	homÅ“opathists	predisposition	septicaemia	elytrotomy	omentumectomy	ileus	garget	braxton	unpreventable	ovum	varicocelectomy	discrimination	acardius	libertarians	nonvoluntary	ahca
197	decapitation	susceptio	desisting	curara	unskilfulness	feetation	sciatica	haemor	nephritis	eesarean	donothing	disputes	ovarian	riage	unsuc	multiparity	unindicated	cephalocentesis	childlessness	fertilisation	antitobacco
198	mirror	emotions	puberty	hamorrhage	dysmenorrhcea	susceptibility	hÅ“maturia	selfinduced	pyasmia	descensus	acount	supravaginal	dysmenorrhea	avitaminosis	pericardiostomy	infection	fertilization	rearing	litigants	abor	decriminalized
199	taenia	tests	yvho	hunier	disorganizations	fetation	incontinence	auother	lobar	torsion	hypnotization	multipart	eclamp	extrauterino	coonclusions	drinking	uncontested	smallfor	opting	afghan	jurisdictional
200	hurtfulness	intoxication	uterogestation	catharties	quelled	preguancy	variola	ctesarean	heemorrhage	abuse	uephrectomy	dent	pubiotomy	placental	prcevia	placentac	use	congenitally	betrayal	nonreassuring	opioid
