# Supplementary material for: Insights from full-text analyses of the Journal of the American Medical Association and the New England Journal of Medicine
Source: eLife. 2022 Jul 7;11:e72602. doi: 10.7554/eLife.72602 (PMC9262397; doi:10.7554/eLife.72602)
Supplement: Supplementary file 5. [file elife-72602-supp5.xlsx]

## Sheet: eTable_5_bias_JAMA
	1880-1889	1890-1899	1900-1909	1910-1919	1920-1929	1930-1939	1940-1949	1950-1959	1960-1969	1970-1979	1980-1989	1990-1999	2000-2009	2010-2019
0	stigma	guilt	insincerity	condonation	prejudice	reasonings	prejudice	overgeneralization	biases	biases	biases	biases	biases	biases
1	beneficence	preferences	prepossession	reasonahle	insincerity	argumentation	disadvantageously	overmatching	prejudice	selection	biased	biased	biased	selection
2	vileness	inborn	instinets	adjudge	pretentions	triteness	didacticism	uncertainty	biased	overmatching	selection	selection	selection	confounding
3	jearning	denial	partisanship	insincerity	prepossession	marshalling	overload	foreknowledge	repetition	biased	misclassification	nondifferential	misclassification	unmeasured
4	respomsibility	trammels	reasonings	eruel	partisanship	didacticism	preconception	prejudice	errors	selfselection	nondifferential	selfselection	confounding	biased
5	inflictions	jurymen	perverseness	premeditation	depreciating	fairness	selfcentered	nonpublication	overmatching	biasing	confounding	misclassification	unmeasured	misclassification
6	imbues	prepossession	disinterestedness	meddlesomeness	deluding	prejudice	expectable	oversimplifications	generalization	generalization	overmatching	confounding	nondifferential	attrition
7	adherence	hypnotizer	diseredit	untruthfulness	unreserved	adducing	hewed	artificiality	validity	nonindependence	imprecision	masking	funnel	blinding
8	prostitution	misconstruction	eruel	jurymen	indiscriminating	doctrinaire	histrionics	generalization	discrimination	overgeneralization	selfselection	blinding	selfselection	validity
9	equity	validity	enthusinsm	tactless	unkindly	impressiveness	neutrally	interpretational	preferences	oversimplifications	underreporting	misreporting	imprecision	imprecision
10	dual	wantonness	prejudice	carclessness	detraction	tentativeness	schematization	disputable	misclassification	repetition	misreporting	representativeness	misreporting	null
11	selfinterests	prepossessions	imposture	indiscriminating	pretentiously	openmindedness	bewilder	overemphasizing	thinking	indirectness	underascertainment	unmeasured	overfitting	collider
12	benevolence	impeached	denial	culpably	calumnies	rehashing	emasculating	retrospective	schematization	underascertainment	recall	collider	metaanalyses	imbalance
13	baseness	conscience	iconoclasm	misconstruction	wrongness	sophistical	doctrinaire	subconscious	imprecision	doctrinaire	generalization	overmatching	asymmetry	misreporting
14	arrogating	prejudice	disputes	partisanship	shirked	gestures	rehashing	uneritical	interpretation	imprecision	indirectness	metaanalyses	indirectness	funnel
15	trustingly	insincerity	egoistic	unreasonableness	reasonings	uncorroborated	characterless	illusionary	misinterpretations	foreknowledge	overreporting	imprecision	nonresponse	observational
16	intuition	recreant	justness	wilfulness	untruthfulness	altruism	overcompensate	biases	blot	schematization	blinding	overreporting	collider	metaanalyses
17	calumnies	anthority	hostility	unpatriotic	egoistic	inaceuracy	pigeonhole	repetitiveness	retrospective	overinterpretation	representativeness	attrition	collinearity	confounders
18	heinousness	confessing	unhesitating	grossest	selfreliance	illogic	philosophize	biasing	objectified	nondifferential	blinded	nonresponse	colinearity	rigor
19	conscience	fairness	inculeate	diseredit	grudge	deductively	prepossession	cues	nondifferential	leadtime	nonrandom	methodologic	residual	indirectness
20	wrangles	flippantly	fraudulency	uncorroborated	levity	prevarication	cogitation	extrapsychic	visually	uneritical	biasing	nonrandom	overmatching	methodological
21	procrastination	unpatriotic	secretiveness	exculpate	foolhardiness	partisanship	itselfi	overdependence	judgment	semantic	leadtime	leadtime	metaanalytic	desirability
22	contravening	competency	openmindedness	unwarrantably	metaphysical	selfcentered	howÃ©ver	nonindependence	doctrinaire	overreporting	unmeasured	indirectness	representativeness	ecological
23	absolution	partisanship	slanders	untruth	affectation	profounder	indirection	countertransference	precision	misreporting	validity	methodological	overadjustment	limitation
24	undervaluation	proselyte	professionnl	impeached	openmindedness	stereotyped	theidea	misconception	inaccuracy	indicting	attrition	unblinding	biasing	residual
25	trammels	diffidence	metaphysical	deductively	disinterestedness	concreteness	interlocked	blameworthiness	interpretational	indexer	collider	biasing	heterogeneity	analytic
26	willfulness	controverting	shrewdness	sophistical	adroitness	arbitrariness	steal	tendentious	verbalizations	skew	unrepresentative	reanalyses	inconsistency	reanalyses
27	fairness	histrionics	oracular	exccuted	proprieties	pretentiously	ruthlessness	subjectivity	unrepresentative	unconvineing	missingness	nonblinded	analytic	unconscious
28	fettered	sophistical	vituperation	wrongness	worthier	justness	incomprehensibility	hunches	indirectness	batching	methodology	underreporting	biasin	selfselection
29	inconsiderately	ungenerous	profounder	pleader	prepossessions	sophomoric	fabrie	overenthusiasm	undocumented	unrepresentative	study	discrepant	misclassifications	ntdb
30	sophistical	selfrespecting	zoophilism	misconceived	innuendoes	indicting	bootstraps	schematization	errone	unconcealed	noncomparability	nonindependence	geneenvironment	cois
31	theii	misconception	politieal	averments	aspersion	timeworn	mneed	didacticism	pessimism	nonpublication	problem	biasin	reanalyses	incomplete
32	misdeed	estopped	pretentions	prejudicing	oracular	hagiography	sops	vacillation	foreknowledge	tendentious	undercounting	metaanalytic	nonindependence	representativeness
33	humoring	distrusting	wantonness	estoppel	boastful	inexactness	arbitrariness	sloppiness	distortion	sciously	asrp	multicollinearity	undercoding	asymmetry
34	equality	egotistic	ingenuousness	prejudicially	justness	motivation	authorial	rationalization	oversimplifications	misreading	undocumented	dichotomizing	overreporting	overadjustment
35	parental	donbt	depreciating	shamming	rancor	crudity	equality	procrastination	rationalization	prepossession	overestimation	inconsistency	selfreporting	nondifferential
36	ostracise	ungentlemanly	untruthfulness	blundered	persuasiveness	hidebound	alibis	inaceuracy	subjectivity	overdependence	nonindependence	missingness	leadtime	heterogeneity
37	officiousness	stigma	misconception	apprehends	confessing	levity	uproot	marshalling	tendentious	overstatements	uncertainty	nonrandomized	limitation	erfc
38	morale	uncharitable	competence	inquisitions	didacticism	diffidence	unemotionally	illegibility	permissiveness	underrating	dropouts	overestimation	unblinding	overfitting
39	existentially	condonation	fairness	partiality	partiality	faultfinding	cumbersomeness	misinterpretations	biasing	wishful	spuriously	heterogeneity	overdetection	selfreporting
40	expiation	arrogates	proprieties	innate	characterless	haggling	necesary	indicting	optimism	representativeness	falsepositives	tradeoff	quasiexperimental	recall
41	guilt	stultify	selfishness	overconfident	misconceived	partiality	unpleasing	misclassifications	nonrepresentative	antihomosexual	misclassifications	overfitting	subanalyses	underpowered
42	stultification	reposes	indiscriminating	aforethought	flatters	nonacceptance	casualness	nonemotional	behaviors	nonrepresentative	overadjustment	overinterpreted	frequentist	dmcs
43	somnambulist	purposefulness	suspicional	crossexamination	wantonness	unwisdom	prevaricate	noncomparability	comprehensibility	faulted	disparity	heteroscedasticity	betweenstudy	missingness
44	irresolution	discourtesy	fearlessness	bigoted	captious	rebutting	noncooperation	judgmental	overgeneralization	repetitiveness	q12hr	overdetection	underreporting	dropouts
45	skilfulness	vindicate	purposefulness	reasomable	politeness	premeditation	judiciousness	unrepresentative	semantic	unverifiable	undercoding	undercoding	null	gdg
46	preferences	blundered	abasement	impolitic	rationalization	delief	sidetrack	behaviors	catchwords	antitherapeutic	ascertainment	skew	confounders	heuristics
47	spurning	upholders	upholders	hurden	sophistical	dogmatism	forcefulness	sidesteps	dissatisfaction	misspecification	unblinding	overadjustment	temporality	spillover
48	untrammelled	pampering	aspersion	uncthical	underrating	adroitness	discounting	overexposures	inaceuracy	unglamorous	study1	uncertainty	discrepant	undercoding
49	selfseeking	conscientions	improvidence	exeuse	stultifying	particularity	overweighted	arbitrariness	correlational	codable	abenefit	misclassifications	attribution	uncertainty
50	pardoning	analogical	dissimulation	estopped	prosy	vitalist	obsessively	meticulousness	judgmental	attribution	inclusion	interphysician	missingness	generalizability
51	oversteps	trath	levity	incaleulable	doctrinaire	theorization	wellconstructed	categoric	attribution	oversimplification	design	reabstraction	overestimation	nontruncated
52	avords	loftiness	prepossessions	underhanded	inculeate	histrionics	voeations	unglamorous	selectiveness	misunderstanding	downgrades	cois	cois	cointerventions
53	jealousy	slanders	optimism	impertinence	vehemence	innuendos	circularity	uncorroborated	interjected	sloppiness	screenee	collinearity	metaregression	influence
54	disdaining	disdaining	sacrilege	wantonness	ingratiating	cribbed	intuition	interjected	subconscious	correlational	skew	selfreports	reran	overreporting
55	perverseness	levity	vitalist	surcly	imbuing	sidesteps	triteness	indirectness	oversimplification	antipsychiatric	multicolinearity	noncompletion	methodological	overdetection
56	meddlesomeness	avow	disclosure	becaunse	shame	perspicuity	inconspicuously	jjudgments	nonindependence	esoterica	reputational	attributional	underascertainment	colinearity
57	abhorent	disputes	chirography	hedging	psychanalyst	relevancy	ohserver	impracticality	nonrandom	errone	overinterpretation	multicolinearity	nonrandom	biasin
58	fascinations	perverseness	seleetion	indirection	scornful	sureness	tentativeness	gencralizations	intelligibility	judgmental	noncompliers	nonnormality	randomeffects	adjustment
59	conspires	brutalizing	idens	proprieties	diffidence	baseless	prepossessions	vitalist	directionality	understating	counterargument	noncoverage	multicollinearity	masking
60	pelf	untainted	ego	insincere	excellences	tinctured	fairness	prepossession	interactionist	noncomparability	datamay	withrespect	nonnormality	kq2
61	cognition	placated	arbitrariness	discourteous	subjugate	oversimplifications	discriminate	unexpressed	misunderstanding	underestimating	biasin	selfreporting	underpowered	subconscious
62	inflexibly	perspicuity	scepticism	misdeed	condescension	flatters	flatters	validity	simplification	counterargument	confounder	underascertainment	recall	nonrandomized
63	chastisement	unkindness	knoavledge	remediless	demagogue	rudeness	propagandize	crudity	methodology	jjudgments	comparability	apriori	overdispersion	kqs
64	erroneousness	aspersion	pander	sacrilege	slanders	protestation	capitulate	uncontroversial	leadtime	invalidates	overinterpreted	overdispersion	nonblinded	overdiagnosis
65	dependency	animus	underrating	falseness	deification	journalistically	antiscience	doctrinaire	selfselection	eonduct	withinindividual	validity	generalization	biasing
66	competence	estoppel	jurymen	reproof	boastfulness	essaying	idiosynerasies	overstatements	overfitting	illogic	crosscontamination	methodologically	benefitin	paradoxical
67	eredulous	perjured	didacticism	blameworthiness	broadminded	superfluity	propagandistic	divergencies	ohserver	comprehensibility	dissatisfaction	crosssectional	overinterpreted	confounder
68	conduect	diseredit	enquiring	vesponsibility	unpatriotic	dogmatie	unburdened	partisanship	prejudiced	adeptness	interphysician	jjudgments	miscommunication	overmatching
69	eourts	interject	rectitude	exonerate	prejudicing	optimism	crudity	cancerphobia	sloppiness	discrimination	change	abenefit	preadoption	benefitand
70	respounsibility	deluding	detraction	stultify	falseness	interpretational	unpack	fallaciously	misclassifications	catchwords	precision	frequentist	confounder	strobe
71	delict	equation	garbling	prevarication	freudism	heterodox	foreknowledge	dissatisfaction	nonhypnotic	attempter	nonblinded	differencesin	collinear	inconsistency
72	chirography	unskillfulness	beliel	malefactors	forcefulness	beclouded	fiddling	noncooperation	oculogravic	misclassification	replicability	cointervention	hospitallevel	frequentist
73	purpuse	togive	trammels	pretence	hedonism	overgeneralization	cleverest	untestable	codable	interactionist	discrep	collinear	nontruncated	generalization
74	malefactors	apprehends	docility	malinger	garbling	hedging	skilfulness	semantic	selection	fantasied	crosssectional	correlational	methodologic	metaregression
75	gencralization	justness	juristic	caviling	rehashing	cogency	illogically	alibis	downgrades	crudity	rrrs	null	preplanned	overestimation
76	formof	haply	discrimination	unwisdom	overweighted	skilfulness	comports	polemically	empathizing	levelled	bestcase	nonvalid	unconfounded	temporality
77	asperity	jealousy	loftiness	foolhardiness	ideologic	interjected	fastpaced	precognition	hyphenation	overinterpreting	jjudgments	overgeneralization	benefitand	handovers
78	alien	opinien	hypnotizer	unobservant	unbelievers	persuasiveness	hearer	unanalyzed	arbitrariness	nonanalytical	masking	randomeffects	hypothesizing	kq5
79	indelicacy	accusers	hedonism	reprobation	metaphysicians	baldly	experiencÃ©	foolhardiness	illegibility	interphysician	webelieve	nonexperimental	adifference	harm
80	upbraid	forgiveness	covetousness	stereotyped	profounder	controverting	delincated	unwarrantedly	estrogenicity	nonrandom	null	unassessed	cointervention	kq3
81	distrusting	unbelievers	reasonahle	crroneous	debase	irrelevancies	resectionist	stratagem	deprecation	nonrational	noncausal	generalization	noncompliers	underreporting
82	aready	reasonings	dethroned	deluding	recriminations	imbuing	excellences	malingering	analytic	errors	reabstraction	colinearity	overgeneralization	patientimportant
83	beneficently	preju	basest	pessimism	crudities	ratiocination	suech	nondifferential	falsepositives	interpretational	data	attempter	desirability	microaggressions
84	dilatoriness	obtuseness	convietions	irrefragable	gkill	pretentions	conmsider	invalidates	overinterpretation	blameworthiness	benefitand	betweenstudy	withinperson	abenefit
85	witkout	contagionists	opinien	dissimulation	sophomoric	garbling	marshalling	optimism	oversimplistic	inaccu	case	pharmacoeconomic	selfreports	metaanalytic
86	naturce	virtuously	supineness	perverseness	protestation	affirmations	nonacceptance	underpowering	sciously	misinterpretations	dgu	nontruncated	nonresponses	nonindependence
87	intelleetual	impeach	somnambulist	doetrine	pacifists	behaviorism	profundities	oversimplifying	nonpublication	misclassifications	underdetection	outecomes	overrepresentation	subanalyses
88	allures	accuser	pretexts	trath	indelicate	indirection	mwust	countervailing	audioanalgesia	illegibility	differencesin	noncausal	noncoverage	individuallevel
89	1dea	solidism	effeminacy	slanders	yearnings	expedience	openminded	reportorial	noncomparability	counterarguments	eaon	confounders	covariances	aqc
90	protestation	quesiion	probity	inaceuracy	pedantry	alibis	intellectually	wellunderstood	randomized	underreport	lerror	poststratification	replications	attribution
91	punctiliously	perjure	unmoral	surplusage	distrusts	restating	challengers	disgust	transference	confounding	preassigned	covariances	nonsystematic	propensity
92	threshold	reproof	foolhardiness	disadvantageously	usurps	legalistic	disentanglement	inaceurate	interpreta	hypothesizing	misspecification	interreader	subjectivity	collinearity
93	vengeful	kleptomaniac	qualm	flippantly	eruel	boastfulness	detestation	nonacceptance	tachistoscopically	guessing	dsss	qualitative	empirical	studies
94	automatism	indelicate	preferences	diseriminating	befog	crudeness	vitalize	portmortem	testee	editorializing	q24hr	masked	nonvalid	noncompletion
95	bloodletting	eruel	convietion	indelicacy	unwisdom	abasement	undirected	overreporting	rehashing	reputational	derestimate	datamay	trcts	nonrandomised
96	dispossess	disinterestedness	worthier	seleetion	selfrespecting	thisisnot	stigma	infeasibility	transtylation	arbitrariness	underreport	benefitand	differencesin	nonresponse
97	dominant	gelf	ingratitude	protestation	selfishly	selfcriticism	circumlocutory	dynamisms	computational	nonconformity	covariances	overdiagnosis	skew	optimise
98	routinist	disbelieved	unworthiness	condoning	stultify	overenthusiasm	sagaciously	stems	uncertainty	infeasibility	errors	illegibility	interpretability	intrinsic
99	defacing	fanatically	boastfulness	assenting	demagoguery	recriminations	hedging	nonhypnotic	terpretation	preferences	ntdb	rigor	incomplete	empirical
100	narrowminded	discourteous	animus	compassion	disown	teleology	sophisticate	propagandistic	definitiveness	tautological	selfreporting	temporality	bibliometric	amstar
101	affronts	overconfident	reportorial	faultfinding	uproot	superficiality	satisty	reputational	reportorial	nonacceptance	outlier	riskadjustment	noncomparability	leadtime
102	educators	smartness	reproaches	chimerical	divorcement	prepossession	staking	nonrational	indexer	circularity	collinear	nonadherence	interreader	metaanalysis
103	ideality	chirography	diffidence	unmoral	sentimentalists	unworthiness	unforunate	circularity	unconcealed	overread	interreader	quasiexperimental	metaanalysis	nesting
104	shamming	surplusage	philologic	analogical	avow	scholarliness	disruptive	testee	eikonometer	subjectivity	apriori	nonrepresentative	fixedeffects	gbd
105	effectiveness	untruthfulness	insistance	reasom	iconoclasm	wordiness	interpenetration	imputes	uninterpretable	inaceuracy	overdiagnosis	reputational	noncompletion	multicolinearity
106	repression	enthusinsm	mayhap	unchristian	enshrines	unreserved	resentments	reasonings	confounding	stratagem	noncompletion	precision	correlational	errors
107	mutely	vesponsibility	deluding	flagrantly	zoophilism	reposes	orientate	directionality	purposefully	reanalyze	cois	noncompliers	uncertainty	mcid
108	purposelessness	somnambulist	unwisdom	evidemce	untruth	intersperses	rcally	overinterpretation	error	defensiveness	desirability	conrolled	pharmacoeconomic	masked
109	detestation	beneficence	inculeated	gencralizations	cogency	inconsiderately	skims	ofgreat	adeptness	validations	posttransfer	benefitin	megatrials	interreader
110	warn	enquiring	prevarication	arrogating	misdeed	fallaciously	iearn	paradigmatic	overstatements	objectified	discounting	undersampling	nonrandomized	megatrials
111	passiveness	contumely	largeness	ecould	flippantly	circumlocutory	overzealousness	sagaciously	misregistration	isuspect	betweenstudy	hospitallevel	noncompleters	shortterm
112	expletives	prejudicing	protestation	oracular	antipsychiatric	disputatious	exhaustiveness	rationalizations	repetitiveness	motivation	nonconfirmation	terventions	noncomparable	pharmacoepidemiologic
113	brusqueness	meditation	renunciation	laches	parochialism	comprehension	vitalist	casualness	keypunching	wellunderstood	overdispersion	trcts	heteroscedasticity	interpretability
114	priety	premeditation	underhanded	aspersion	diseredit	complacence	essaying	backsliding	representativeness	altruism	misunderstanding	interlaboratory	ntdb	ascertainment
115	transgresses	remonstrated	sentimentality	pauperization	insincere	overweighted	unrehearsed	suificient	dogmatism	overlap	preconception	illnessrelated	abenefit	spillovers
116	abhorence	paternalism	professedly	declarant	chastisement	subordinating	theywill	dogmatism	underrating	downgrades	artifactual	casemix	scalability	noncomparability
117	unfitting	ostentation	distrusting	indelicate	compeers	ingenuousness	unscramble	dissent	obscurantism	noncausal	nonvalid	undersampled	validity	overdispersion
118	behoves	ateacher	pretentiously	dogmatize	reverential	misconceived	selfreliance	reductionistic	prejudices	avalid	attempter	nonresponses	alimitation	unblinding
119	ostracised	underrating	cleverness	rudeness	belittling	contrariety	partisanship	nondynamic	preference	quibbling	cfrs	dmcs	ourstudy	lvcs
120	basest	becaunse	vindictiveness	prepossession	jurymen	nonchalance	superscription	miscalculations	broadmindedness	covariances	miscalculation	ofpractice	datamay	semantic
121	asthetic	foible	inwardness	unguided	abasement	staking	imagination	adducing	inappropriate	preselection	reanalyses	withinperson	arandom	nonnormality
122	condonation	hearer	doubter	enquiring	selfhood	broadness	torepeat	generalizes	unmeasured	uneritically	hypothesizing	objectified	erfc	riskassessment
123	metaphysical	whim	critie	overhasty	deadbeats	embellishments	unrelentingly	vitiates	ambiguity	overvaluation	apparent	mmep	illegibility	hospitallevel
124	perfidy	misconceived	stigma	oftrepeated	indirection	forcefulness	juristic	nonanalytical	colorvision	misperception	nonrepresentative	subanalyses	riskadjustment	qualitative
125	conseience	lordship	egotistic	ruthlessness	argumentation	innuendoes	instituional	requester	experiencÃ©	shortcoming	nonrespondent	implicit	inversevariance	extrinsic
126	compassion	reproaches	outruns	inculeated	unworthiness	wrongness	perfidy	imprecision	phrasing	interjected	overrepresentation	cfrs	apriori	methodology
127	todie	assenting	erroneousness	unreasoning	soberness	disquisitions	complainers	wishful	cues	misjudgment	overgeneralization	interreviewer	nonrepresentative	projection
128	placein	benevolence	uncorroborated	unconsidered	impressiveness	underrating	vacillation	leadtime	loudness	overinterpreted	noncomparable	overadjusted	reabstraction	cointervention
129	ungoverned	carclessness	unexceptionable	particularization	pretension	ideologic	unguided	oversolicitude	consensus	microaggressions	wellunderstood	testretest	censoring	optimism
130	unphilosophical	incredibility	flatters	absoiutely	reasoners	impugns	centributions	counterarguments	nuance	happenstance	linkable	reran	dichotomizing	kq4
131	hahnemannic	demagogue	knavery	blameworthy	contrition	obtrudes	rudeness	forcefulness	antitherapeutic	artificiality	eohort	unconcealed	overdiagnosis	quasiexperimental
132	validity	eourt	instinetive	affirmations	heedlessly	stinginess	prejudgment	underrating	essaying	ecriticism	prejudice	attribution	dataand	claimsbased
133	incfficient	baseness	pature	compunction	entrusting	undercurrent	rationalization	indirection	imagination	coneur	concernis	nonanalytical	estimators	precision
134	debases	rectitude	apprecintion	guiltless	improvidence	evidemce	throughly	downgrades	meticulousness	misperceived	overfitting	undercounting	observational	pharmacoeconomic
135	etforts	disabused	jealousy	negligenee	hurden	condescension	soulsearching	medicoeconomic	tentions	miscalculation	undercoded	concernis	multicolinearity	asituation
136	outsct	incaleulable	meretricious	lawbreaker	tendentious	mellowness	unattractiveness	batching	informality	overrating	poststratification	megatrials	intercoder	underascertainment
137	ritualism	ostentatiously	deification	wittingly	obtrude	disdains	disarmingly	verbalizations	poststratification	misreads	heteroscedasticity	miscoding	noncatastrophic	outcome
138	aggression	inquisitions	imperturbability	sadness	enthusinsm	formalism	frictionless	overanxiety	attitudes	abenefit	rfut	ntdb	asituation	timeframe
139	monomaniacal	disabuse	unkindness	deccive	arbitrariness	tactless	gestures	unguided	interviewee	phrasing	ofpotential	intercoder	timelimited	quality
140	autocratically	capitulate	grudge	humoring	optimism	perspicacity	absoiutely	meaningfulness	nonrational	fallibilities	thresholds	operationalized	nonexperimental	dsmcs
141	fiduciaries	averring	agnosticism	objeetion	savors	halftruths	boastfulness	deduetions	bandpass	hsmr	withrespect	acgs	patientrelated	distortion
142	amplest	bungler	obtuseness	secretiveness	disrespect	verbal	foolhardiness	wotld	haggling	dissuades	hsmr	underreport	gwa	FALSE
143	greediness	transgressors	guilt	carcless	unguided	narrative	hidebound	diserepancies	verisimilitude	noncompliance	cointervention	upcoding	reanalyze	geneenvironment
144	nonjudicial	fealty	fatuity	pertinency	scepticism	indiscriminating	yearnings	reconcilable	clari	neediness	underpowering	discrep	arelated	extensions
145	discountenancing	exoneration	discourtesy	justness	discourteous	anthropocentric	befog	inexactness	terpreting	explicating	selfreports	posttransfer	individuallevel	attentional
146	jurymen	disre	partiality	routinism	faddish	reproaches	seemn	unworthiness	perception	paradigmatic	underes	asituation	overinterpretation	comparators
147	fruitlessness	deception	diplomacy	pretentions	imposture	philologic	beneficently	shame	wotld	vacillation	lvcs	overrepresentation	webelieve	rcts
148	jupon	befog	bungler	foreknowledge	interject	polemically	sophistries	improbability	null	reportorial	asituation	computationally	underdetection	trcts
149	ecivilization	sacrilege	objeetion	prejudice	moralizing	insincerity	overgeneralization	sops	satisfaction	illusionary	nonnormality	reweighted	crosscontamination	interreviewer
150	butone	unmoral	opinicn	ineapable	ungenerous	vituperative	mystify	antipathetic	tokodynamometer	directionality	nonclaimants	noncatastrophic	attributional	unconfounded
151	unadvised	contriving	carclessness	inconsiderately	bigoted	formalistic	interject	nonperformance	perceptivity	extrapo	prespecification	hypothesizing	illnessrelated	differential
152	unmerciful	entreaty	premeditation	paternalism	sclfish	reprobation	conmnected	fastidiousness	nonstatisticians	confliets	nonequivalence	nonsystematic	methodologically	anprm
153	inexperi	bashfulness	facultics	somnambulist	figments	prosy	unready	reasonahle	covariances	animus	correlational	reabuse	nonignorable	preplanned
154	schoolmen	routinist	competency	altruism	emasculating	unsworn	uncontroversial	alienating	derogated	subconscious	lrccppt	hsmr	posthoc	ctbased
155	submissively	deductively	carnestness	distrusting	ruthlessness	evasiveness	thoroughty	rehashing	stepis	validity	thisstudy	areliable	transparently	bestpractice
156	caviling	intuition	calumnies	undervalue	surrendering	conscience	pleasureable	nonoptimal	highfrequency	covenantal	unassessed	nonimaging	undersampled	suggestion
157	absolutism	depreciating	animosity	accuser	fruitage	characterless	artless	authoritarianism	preciseness	nonclaimants	compliance	variationin	unconcealed	unethical
158	solidism	knavery	discourteous	predicate	moralistic	corollaries	indelicacy	psychodynamic	conflict	overcompensate	noncompliance	nonparticipation	directionality	miscalibration
159	issuable	frivolity	confessing	profounder	staking	irrefragable	acquiescent	resentments	levelled	partisanship	interpretation	subjectivity	rrrs	cohortstudies
160	interdictions	adjudge	unreasonableness	opinicn	subordinating	pessimism	mischievously	illogically	individval	preconceptions	infeasibility	rrrs	nonparticipation	populationlevel
161	soberness	meddlesomeness	voeations	averring	gencralizations	colloguial	derogated	dismissive	misconstruction	toillness	computationally	withinindividual	ourresults	prespecifying
162	brutalize	merriment	intuition	abasement	disdains	quibbling	misdeed	ruthlessness	anger	generalizes	trcts	discordance	unassessed	underpowering
163	importunity	abasement	anthority	dualists	censorious	questionings	sternness	dissuades	colloguial	asituation	tstsss	comprehensibility	reabuse	randomeffects
164	analogical	crossexamination	theologic	vacillation	disloyalty	gencralizations	impugns	overvaluation	feasibly	hypothetico	dataare	abias	ambiguity	rrrs
165	proiessional	sexuality	mendacity	hypnotizer	chicanery	imbues	contlict	antisocial	batching	voluntarist	nonconcurrent	categorizations	operationalized	reran
166	vpon	dissent	anarchistic	imposture	sloppiness	dynamisms	connot	toillness	flicting	missingness	nonindicated	dsss	utiization	inclusion
167	assenting	sacredly	voeation	competency	commiseration	pretexts	conformably	preferences	motivation	retrospective	nonresponses	outlier	precision	quadas
168	mycology	rcally	vesponsibility	pature	selfseeking	pleader	tidily	nonrepresentative	embellishes	selec	masked	intracluster	interreviewer	variable
169	selfdenial	acquiesce	prostituting	reasonings	juristic	outworn	fickleness	correlational	intuition	personal	intercenter	pleiotropy	categorizations	noncomparable
170	oppressing	idcas	aceused	acquit	ecriticism	foolhardiness	sensationally	unrelentingly	introversion	oversimplifying	hsmr30	ofpotential	multiway	kq1
171	conjurers	conciliate	compassion	unneeessary	meretricious	schematization	pcint	hedging	sadism	overadjustment	unconcealed	overrepresent	bestpractice	dataand
172	misconception	insanely	kevery	unskillfulness	tactless	contenting	onlooker	overidentification	attributes	falsify	population	seores	noncausal	vlachopoulos
173	wemust	doubter	morale	insanely	sureness	concretely	recriminations	deducing	reductionistic	relevancy	otoscopie	limitation	dichotomization	misclassifications
174	hended	litigant	ungenerous	selfrespecting	tropes	tautological	syllogistic	concatenation	stereoencephalotome	irrelevance	seenario	confounder	timevarying	selfreports
175	reasoners	grudge	condonation	wrongdoing	secretiveness	untruthfulness	complacence	mwust	interphysician	thisisnot	noncoverage	autocorrelation	misspecification	abias
176	profitess	abashed	sophistical	arbitrariness	preachments	presupposition	sidewalls	impugns	circularity	attitude	unidimensional	anuisance	poorquality	disparity
177	beause	transgressor	condemnable	unkindness	seductions	platitudinous	renounces	inapplicability	cognition	misclassify	acive	extrapo	singlecenter	faes
178	imbuing	condescend	shiftlessness	nugatory	instinets	opinionated	regimented	obviousness	reticence	overfitting	medicaion	underpowering	adherer	fairness
179	sexuality	righteously	inaceuracy	sertous	kindlier	deprecation	tendentious	tangibly	fairness	intersubjective	retrospective	overscreening	carryover	derestimate
180	mneglect	affirmations	condescension	baseless	cleverness	theistic	dragnet	obscurantism	overinterpret	bewilder	caveats	metaanalysis	oversampling	nonadherence
181	athletes	hostility	crudities	rebut	profundity	doctrinal	malinger	evasiveness	coinages	antithromboplastinogenemia	analysis	noncomparability	study2	prejudice
182	embolden	cerity	nonchalance	belicf	antiscientific	uncontroversial	diplomacy	predetermining	inconsistencies	definitiveness	misclassify	variabil	refusers	illnessrelated
183	fÃ©lizet	underhanded	religionist	vituperation	reportorial	crossexamination	deign	glitches	fallibilities	abias	heuristics	thisstudy	cointerventions	underrepresentation
184	asmile	unchastity	analogical	avow	heedlessness	uninspired	unneeessary	distractors	stereographic	researchable	extrapo	cpeu	pcpa	heteroscedasticity
185	prostituting	disown	unwarrantably	pretexts	fatuous	ultrascientific	absolutcly	defensibility	comprehension	preachy	afalse	terion	generalizability	repetition
186	countenancing	hedging	argumentation	sciously	nonchalance	aspersions	unhandicapped	fantasied	uncorrelated	coinages	hbi	scalability	repeatedmeasures	study
187	autonomy	dallying	animadversions	auscultator	detestation	authorial	pigeonholes	antithromboplastinogenemia	undistorted	proselytizing	handovers	brouhaha	logits	sdm
188	therefere	swerve	manliness	depreciating	subservience	misgiving	discrimination	analytic	cytohormonal	computationally	nonautopsied	ourstudy	cohortstudies	patientrelated
189	animadversions	blissful	incredibility	exoneration	disparagement	calumnies	edify	phrasing	reformat	minants	isuspect	systematicreviews	gdg	noncompliance
190	homeeopathists	promptings	penitent	obtuseness	responsihility	trivialities	attune	gleaning	overvaluation	withinindividual	nonresponse	riskbased	validations	rsmr
191	duplication	butthe	pretension	boastfulness	voeations	detraction	aggression	thefact	melded	interject	bbd	reweighting	ofpotential	registrybased
192	deceits	worthier	fadism	trifled	caviling	ecriticism	adroitness	trivialized	neuroticism	attitudes	judgmental	linkable	inconsistencies	methodologic
193	unpleasantnesses	dethroned	congeniality	skilfulness	misconstruction	negation	fallaciously	oversimplification	pigeonhole	multiauthorship	propensitymatched	geneenvironment	qualitative	therisks
194	sophisticate	faots	animating	unthought	opinien	particularization	profounder	paternalism	subproblems	favoritism	reran	inervention	discordance	discounting
195	movenient	evolve	faots	guilt	narrowminded	detestation	procedural	transparently	radioscan	inappro	cytohistological	bestcase	dataare	computationally
196	judiciousness	essaying	donbt	garbling	insinuations	hypothetico	sacrified	explicating	programed	delusional	nonexperimental	overinterpretation	undersampling	apparent
197	smirched	unwisdom	yearnings	countenancing	routinism	oratorical	uncriticized	asituation	unbiased	coneept	outcome	realworld	counterarguments	crosssectional
198	governmental	usto	tactless	averment	nationalistic	rehash	gencralizations	cogitation	overstatement	helpfulin	methodologic	nonconsented	comparators	apriori
199	reprove	anarchistic	oavn	eourt	professedly	undramatic	reasoners	illogic	uneritically	undocumented	nonrandomized	webelieve	nonrandomised	multicollinearity
