# Supplementary material for: Insights from full-text analyses of the Journal of the American Medical Association and the New England Journal of Medicine
Source: eLife. 2022 Jul 7;11:e72602. doi: 10.7554/eLife.72602 (PMC9262397; doi:10.7554/eLife.72602)
Supplement: Supplementary file 6. [file elife-72602-supp6.xlsx]

## Sheet: eTable_6_bias_NEJM
	1810-1819	1820-1829	1830-1839	1840-1849	1850-1859	1860-1869	1870-1879	1880-1889	1890-1899	1900-1909	1910-1919	1920-1929	1930-1939	1940-1949	1950-1959	1960-1969	1970-1979	1980-1989	1990-1999	2000-2009	2010-2019	2020-2029
0	thinness	milasen	masking	degradation	prepossession	jealousy	outcome	denial	aggressive	insincerity	avowal	deception	misconstruction	misjudgment	nonexistence	prejudice	biases	biases	biases	misclassification	biases	limited
1	frenum	pensionnaires	elimination	disputes	dissatisfaction	divorce	personality	juryman	prepossession	sinfulness	eritic	symbolic	fairminded	procrastination	prejudice	pervasive	misclassification	biased	misclassification	biases	misclassification	part
2	playing	fÃ©lida	beneficence	allopathists	unchristian	fairness	trait	unwisdom	conscience	unwisdom	expositor	inborn	blinded	discrimination	provable	overenthusiasm	biased	misclassification	biased	confounding	selection	out
3	seeking	bioprospecting	justily	dissent	validity	prepossession	hostility	scoffing	fairness	carclessness	carnestly	guilt	verbal	pessimism	subjectivity	generalization	selection	biasing	selection	biased	biasing	work
4	menorrhagia	evali	maze	despises	secresy	stigma	reversal	conscience	repression	unmanly	convietion	conscience	broadminded	misconception	generalization	hunches	biasing	selection	confounding	selection	biased	major
5	colitis	shinal	epiestion	dissatisfaction	impulsive	grounded	blinded	prudish	denial	biassed	scoffing	insincerity	disavowal	grudges	denial	biases	prejudice	imprecision	nondifferential	nondifferential	confounding	third
6	contamination	rimegepant	reproductive	arrogating	allopathists	refusal	competency	jealousy	slovenliness	unsettle	witticism	subconscious	ecriticism	depreciatory	fantasy	undocumented	imprecision	nondifferential	overreporting	biasing	nondifferential	lead
7	gifted	phps	unexplained	meddlers	hallucination	competency	validity	excusing	forbearing	metaphysical	ecriticism	intolerant	misjudgment	gynic	denigration	subjectivity	retrospective	blinding	biasing	underpowered	nonresponse	affect
8	traumatic	hivctr	enslaved	enormities	partialities	adverse	threshold	impolitic	vindictiveness	deprecation	recreant	malevolence	dogmatize	shirks	incongruities	injustices	problem	representativeness	design	overreporting	attrition	family
9	anomalies	rs12255372	disclosure	vindictiveness	reasous	unchristian	restrictive	impiety	disabused	dispossess	dispossess	sinfulness	indelicacy	comprehension	misjudgment	denial	nondifferential	generalization	ascertainment	nonresponse	blinding	short
10	nymph	attrm	toppling	homeeopaths	deception	dishonestly	administrators	reproaches	persecutors	scoffing	suthor	sham	preferences	ritualized	disputes	invulnerability	judgment	preference	underascertainment	ascertainment	underpowered	process
11	teaching	bicla	pensionnaires	espionage	aptitude	conscience	educators	innate	disarrange	laudation	dogmatize	disgust	derogation	syllogism	evolve	biasing	representativeness	confounding	null	representativeness	overreporting	student
12	block	difelikefalin	crities	behindhand	dishonestly	validity	deprivation	insincerity	theleast	reproaches	couÃ©	pettiness	bewilder	unsystematic	gynic	motivation	uncertainty	miscoding	imprecision	confounder	rigor	large
13	immobility	nonsedation	toothers	interpretation	theywould	shame	beneficence	damnable	biassed	misconstruction	broadminded	repression	flashy	cycloid	hunches	preconceptions	unjustifiably	disparity	representativeness	underreporting	analytic	making
14	sucking	klhl11	enigmatical	unreflecting	autocrats	vouchsafe	dissent	stultified	avowing	deception	occultism	antisocial	interjected	disclosure	retrospective	moralizing	misinterpretation	overreporting	underpowered	underascertainment	harm	diagnostic
15	dorsalis	asciminib	chimera	response	uninstructive	sadness	activities	unsettle	laudation	beguile	prepossessions	willfulness	prepossessions	easygoing	conflation	uncertainty	errors	interpretation	misclassifications	confounders	confounders	decision
16	reform	nifla	cognisant	unchristian	basest	generalization	marital	inquisitorial	disloyal	prepossession	vindicates	prejudice	disabuse	incongruities	unverifiable	rationalizations	validity	misclassifications	unsurprising	dropouts	misclassifications	clinicians
17	attrition	anifrolumab	fÃ©lida	remissness	partizan	theleast	equity	biassed	presumptuously	avowing	animadversion	denial	frustration	expedience	overenthusiasm	reticence	subjectivity	validity	underreporting	misclassifications	propensityscore	populations
18	tonsil	volanesorsen	theday	educational	bythose	partialities	repression	grounded	partizan	swerve	propounding	misjudgment	disavow	selfdiscipline	guesswork	semantic	overreporting	problem	underestimation	unsurprising	confounder	evali
19	narcissus	eteplirsen	hisown	vaunt	dabblers	uncontradicted	inventors	avowing	revengeful	unworthiness	contrives	foolhardiness	complaisant	disavowing	downgrading	judgment	invalidates	nonsignificance	misreporting	generalization	imprecision	face
20	nevi	esturro	purposefulness	discountenancing	propricty	allopathists	individuality	supineness	espionage	prudish	animadverting	preferences	pessimist	repetition	disclosure	elitism	conformity	design	attrition	unmeasured	representativeness	local
21	thrive	omadacycline	alreadybeen	stultify	snobbish	avowing	cesalpino	hisown	unmanly	cxpress	oracular	disloyal	insincerity	selfconfidence	absolving	overemphasizing	pitfall	uncertainty	methodologic	disparity	nonadherence	behavior
22	accessory	ligelizumab	emasculate	overawed	steal	presumptuously	intendance	validity	dishonestly	malevolence	sentimentalist	acquisitive	hisown	artistic	undemonstrated	forgivable	overinterpretation	underascertainment	confounder	reanalyses	ascertainment	epidemic
23	basement	mbnl1	malpractice	demagogue	overawed	forece	sham	sinfulness	deception	juryman	ecritical	jealousy	naivete	aptitude	antisocial	misinterpretations	noncompliance	ascertainment	overestimation	misreporting	validity	physicians
24	gap	voxelotor	ecivilization	magnates	theleast	instinct	guilt	narrative	unwisdom	conventionalities	regare	depreciatory	disavowing	overconcern	imponderables	pessimism	noncomparable	adjjustment	uncertainty	hmgs	noncompliance	critical
25	larvae	xlhed	cementum	behavior	slovenliness	palliation	palliation	supposititious	docility	slovenliness	fairminded	rascally	confute	misjudgments	rationalizations	underestimating	flaw	noncomparability	nonsignificance	imprecision	overdiagnosis	side
26	gly38	solo1	cesalpino	prepossession	undiscriminating	complaisance	malingering	dispossess	excusing	impolitic	pessimist	ego	beneficence	verbalized	transference	preference	outcome	methodologic	carryover	masking	attitudes	remains
27	valsalva	zoliflodacin	gdpr	unbelievers	forece	undeceive	affective	indiscriminating	conciliate	conscience	peroration	unwisdom	affirmations	individuality	overemphasizing	parochialism	randomness	nonresponse	nonresponse	design	riskbenefit	healthy
28	core	dubourque	w7hich	fellowcitizens	uncontradicted	basest	aggressive	counterfeited	sacredly	naivete	hisown	scoffing	ratiocination	denigration	uncertainty	denigration	noncomparability	noncomparable	validity	validity	masking	young
29	buds	vosoritide	misperceived	partialities	avowing	ancestry	morale	adherence	indecency	impossibilities	impertinence	phobia	forbearing	contestable	preconceptions	nontrivial	empirical	overinterpreted	noncomparability	censoring	postrandomization	illness
30	tuberous	pb2452	widowhood	guilt	grounded	aptitude	preferences	subterfuges	unkindness	derogate	derogate	conventionalities	edify	complacence	nontrivial	unjustifiably	attitude	retrospective	inconsistency	noncomparability	reanalyses	procedures
31	solving	debore	intermarrying	barbarities	pretexts	morals	innate	unpractical	swerve	misjudge	supererogatory	individuality	denial	unbalance	ineptitude	unsystematic	overestimating	limitation	dropouts	inconsistency	contamination	specific
32	therapeutic	peged	intendance	anarchists	dissonance	impeached	shyness	metaphysical	wilfulness	excusing	altruism	unshakable	uncomplimentary	factional	utilitarians	extremists	consensus	noncontrolled	miscoding	interpretation	underascertainment	initial
33	innate	bempedoic	landmarks	refusal	dominant	unpractical	token	diserimination	transgressor	warn	dictums	basest	eriticisms	elaims	crosscontamination	warn	blatantly	analytic	overinterpreted	carryover	interpretation	harm
34	parasitic	mitapivat	pointis	cringing	w7ould	warn	arabs	shame	unpractical	obtrude	hypnotist	seducer	convietion	irresolvable	innuendoes	arbitrariness	definitional	csrs	nonblinded	methodologic	overadjustment	under
35	urticaria	nasem	values	sacredly	alliance	togetherness	equality	malpraxis	prevarication	vaunt	laudation	unworthiness	avowal	certainties	foretelling	attitude	nonexperimental	nontrivial	limitation	overinterpreted	robustness	conditions
36	intuition	luspatercept	gastroptosia	haply	unexceptional	guilt	epiestion	opprobrious	vaunt	unkindness	confute	selfpreservation	appall	stocktaking	biasing	syllogism	provable	underestimating	counterfactual	overadjustment	nonblinded	person
37	polydipsia	tucatinib	fairness	bagatelle	thonght	clergy	stigma	transgressed	bagatelle	unhallowed	storyteller	debase	disabused	oedipal	misconception	defeatist	recalcitrance	nonvalidated	overdiagnosis	recall	recall	clear
38	aura	icosapent	concerningthe	disown	startle	secresy	parental	adverse	unbelief	sentimentalism	sententious	viciousness	avowing	selfevident	suppositions	patientdoctor	miscommunication	selfselection	methodologically	miscommunication	samplesize	sensitivity
39	ganglion	hhcn4	undiscriminating	basest	ulness	bantingism	couÃ©ism	consultants	supineness	damnable	ultimatum	unmanly	doubter	misplacing	ineradicable	retrospective	unsurprising	misinterpretation	oversampling	nonsignificance	counterfactual	order
40	inertia	cbme	meditation	immoralities	emasculate	helping	achievement	unmanly	leniency	forbearing	ratiocination	diplomacy	pessimists	prescientific	falsifiable	repetition	inaccuracy	overinterpretation	overinterpretation	attrition	crosssectional	size
41	nile	nmcrpc	excuso	unlettered	bungler	apathy	sequestration	unshakable	peer	punishment	superfluities	wrongness	broadness	preconceptions	misjudgments	representativeness	underascertainment	unsurprising	unresolvable	overinterpretation	miscoding	single
42	molar	cebocephaly	gabapentinoids	asperity	governmental	deception	leadership	slovenliness	proselytes	shame	impolitic	conscienceless	prudish	interrelatedness	pessimism	enticements	inconsistency	nonconcurrent	csrs	noncompliance	dropouts	role
43	aqueduct	p1025	bioprospecting	persecute	togetherness	experimentation	aptitude	basest	guilt	proselytes	forbearing	stultified	abstractly	diabolic	wrongdoing	validity	trivialize	inaccuracy	overadjustment	overdiagnosis	prescreening	attention
44	cho	sma1	notjust	theleast	overmastering	recipients	mite	indecency	jugglery	impiety	selflessness	innate	reportorial	slights	arisc	obfuscate	selfselection	correlational	noncausal	kcps	proactive	absence
45	anomaly	alpelisib	dbetter	ostracize	thefacts	partizan	extinction	unbelief	scoffing	prudery	expounder	prudish	perseveres	hypnotist	arbitrariness	trivialize	reality	ancedotal	interpretation	propensityscore	unethical	exposure
46	metacarpal	onyalai	ethidene	proficients	satisfled	vaunt	juvenile	hypnotizer	bungler	enquiring	deception	inquisitorial	disrespectful	statesmanlike	patientdoctor	overreporting	overinterpret	obfuscate	unmeasured	nonblinded	stigmatization	coverage
47	scalded	placebocombination	inspite	distrusting	participation	adjudge	attitudes	vituperation	forece	demoralization	wellgrounded	evolve	sentimentalism	broadness	theorics	subconscious	antisocial	overinterpret	miscommunication	overinterpret	desirability	poor
48	emergency	remdesivir	appareut	unrighteous	supineness	dissent	dissatisfaction	pettiness	unfaithfulness	misjudgment	metaphysician	showmanship	censorious	briefness	imprecisions	ineptitude	misinterpreting	probabilistic	confounders	quasiexperimental	disparity	delirium
49	occult	hziy	smiling	indecorous	indecorous	shared	helplessness	malevolence	unpunished	misapprehended	unreasonableness	vindictiveness	sentimentally	ineptitude	asseverations	unethical	preferences	outliers	stochastically	oversampling	unmeasured	knowledge
50	yaws	aprocchss	mrts	unobservant	vouchsafe	individuality	inappropriate	flagrantly	snobbish	conciliate	indelicacy	delusion	diserimination	hortatory	arrogation	quirks	attrition	outcome	unbiased	unblinding	optimism	complications
51	prison	ibrutinibrituximab	shinal	hypocrites	adverse	display	disabilities	onslaughts	unafraid	jealousy	harangue	prevarication	revelatory	rebelliousness	hyperoxia	preferences	methodologic	randomizing	overoptimistic	crosssectional	iterations	physician
52	ape	enzamet	ofpractice	compassion	meddlers	equality	narrative	dishonestly	abides	perverseness	avowing	sentimentalism	weightier	awareness	miscalculations	simplification	ambiguities	inconsistency	nonconcurrent	overestimation	unsurprising	spread
53	matrix	bcx7353	suggestedthat	repulse	anyr	benevolence	phlebotomy	meddlers	dispossess	debase	allegory	expedience	pessimism	chastening	illegibility	irrelevancies	chiropractor	nonblinded	noncontrolled	underestimation	nonvalidated	current
54	taenia	sacituzumab	chechen	bythose	damage	disputes	consumer	solecism	intuition	questionings	revelatory	avowing	indirection	dreams	coverup	esoterica	overinterpreted	interpretability	exsmokers	noncontrolled	industryfunded	presentation
55	bees	gdpr	overawed	underbidding	identification	policy	jealousy	extremists	dbut	iconoclasts	disavowal	ineptitude	saythat	defeatism	trivialize	apolitical	interpretation	attrition	correlational	blinding	overestimation	organ
56	ascaris	bvab3	cerebrasthenia	snobbish	analogue	deficiencies	hydropathy	indirection	slandering	dissatisfaction	presumptuously	sport	optimism	defers	selfconfidence	blatantly	overenthusiasm	selfreporting	overestimating	generalizability	nontrivial	investigation
57	scorpion	patisiran	epilepsia	gratifies	helping	dualists	mutilation	impossibilities	recreant	dishonestly	disarms	thoughtlessness	moralizing	uncertainty	intangibles	relativism	downgrading	underpowered	nonadditive	misclassifying	overestimating	students
58	eradication	uncombable	thefacts	ulness	intermarrying	impulsive	intellectually	viciousness	selfreliance	sufferance	pessimists	unpatriotic	defeatist	transference	teleological	jjudgment	misjudgments	nontherapeutic	recall	nonadherence	qualitative	home
59	disgust	neph2	aberrations	classof	premeditation	unbelievers	brenner	contrariety	drudge	disgust	tactician	altruism	apologizing	hairsplitting	semantic	disparity	nonsignificance	reanalyses	quasiexperimental	miscoding	nonsignificance	central
60	murmur	jmtv	conviet	deport	bimply	espionage	copulation	prepossession	preferences	quack	reportorial	easygoing	easygoing	fanatically	andric	downgrading	moralizing	refusal	interpretability	nonconcurrent	differenc	set
61	drought	hsan1	inferable	dishonestly	tricked	penitent	nod	jurymen	discountenancing	decencies	forearmed	affronted	unappreciative	reliving	disavowing	desirability	probability	informativeness	nontrivial	lag	miscommunication	interpretation
62	maize	986165	realizations	recognition	hostility	denial	homeopathy	legalisms	broadminded	wearying	eriticism	carclessness	wearying	becloud	injustices	nonexistence	attitudes	trivialize	pitfall	attribution	plcom2012	child
63	validity	suvrs	scrooge	valetudinarians	insanely	incompetence	solving	mendacious	shirks	endeavouring	faithless	aimlessness	chiding	andric	factional	unacknowledged	forgivable	overgeneralization	nonvalidated	counterfactual	patientreported	diagnosed
64	hoof	flaura	responsiblefor	commuuity	stereotyped	pretexts	crities	slanderous	staking	selfrespect	micawber	selfreliance	bombastic	overinvolvement	misplacing	insanity	arbitrariness	nonexperimental	generalization	nonreporting	mathematical	assessment
65	benign	ezb	procrastination	seein	discountenancing	deigned	ecivilization	imagination	disinterestedly	meanness	misconception	blasphemy	presumptuously	tidiness	formalizing	encumbrances	erroncous	forgivable	aorticroot	hrÃ³bjartsson	generalization	very
66	transformed	convicine	torturer	defile	indelicacy	cringing	hospitalism	shirks	fascinations	secresy	guileless	impulsive	bungler	defeatist	forgivable	shortcut	noncausal	dropouts	informativeness	reanalyze	rcts	therapies
67	obstetric	deoxysphingolipid	contravened	beneficence	fortÃºnale	snobbish	pathway	accusers	dogmatical	eilher	cultivates	lonesomeness	biassed	hisown	permissibility	overinterpretation	overgeneralization	recalcitrance	errors	falsification	errors	late
68	rocky	deoxysphingolipids	unregenerate	toxicophagi	refusal	prospective	selfcontrol	forbearing	cringing	candour	dissent	shirks	slighting	authoritativeness	enticements	commitment	probabilistic	errors	trivialize	inaccuracy	pharmacogenomic	power
69	helix	mfsd8	relapsing	bruited	crities	volition	donor	sentimentally	fairminded	minutie	thework	espionage	otheravise	evenhandedness	hesitance	individuality	nontrivial	pessimism	noncomparable	prejudice	interpretability	cost
70	disproportion	flortaucipir	validity	littleness	imitative	beneficence	insanely	illiberality	blasphemous	foolhardiness	derogation	malpraxis	detest	illogic	foreknowledge	unverifiable	preselecting	reweighted	reanalyses	unbiased	quasiexperimental	community
71	disc	atabecestat	refleet	violator	incumbrances	adaptedness	demoralization	uncontradicted	prepossessions	grief	prolixity	egotistic	unhesitating	overambitious	procrastination	permissibility	randomizing	mddrgs	overtesting	nonindependence	hqid	conducted
72	retardation	nonbinary	backstop	expostulation	mendacious	ulness	eliminative	misconceived	imitative	deceives	apologizing	avonder	carping	relegation	overreporting	attribution	inconsistencies	noncompliance	lefthanders	industryfunded	limitation	climate
73	cambium	ibudilast	now7	prostituted	clangers	fascinations	asphenamine	dissatisfaction	ulness	filthiness	disabuse	solecism	depreciatory	nonexistence	overcautious	feasibly	longrange	cthically	unvalidated	methodologically	feasibly	evaluation
74	abrasion	bcaas	nonbinary	sentimentalists	logicians	realizo	intermarrying	proselytes	unchristian	affronted	knowlege	transgressor	propounding	overenthusiasm	specters	aloofness	misperception	weightings	selfselection	riskbenefit	uncertainty	hivctr
75	cowpox	nmosd	inwardness	betide	prostitution	inappropriate	eradication	laudation	basest	jibes	superman	untruthful	syllogism	singleminded	esoterica	ratiocination	desirability	blinded	nonlinear	null	preference	rare
76	crowding	diskogenetic	minutie	worshipers	committals	occult	correlation	misjudgment	complaisance	obtruded	eulogize	hostility	slovenliness	unreasonableness	stigma	imprecisions	misstated	zilbergeld	intervention	selfreporting	overdispersion	genetic
77	survivors	mab114	retrospective	avowing	cortainly	hisown	transference	minutie	doubter	indelicacy	misconstruction	outraging	micawber	vieav	overoptimistic	miscommunication	error	nonadditive	misclassifying	interpretability	nonconcurrent	physical
78	intervertebral	larotrectinib	sabias	recreant	placebo	indecorous	disparity	fairminded	prudish	subserviency	misapprehended	rapacity	superfluities	preciseness	predicate	unreasoned	procedural	falsification	weightings	nonvalidated	covariables	onset
79	laughter	iqvia	alarger	consecrate	ostracize	miuds	peoples	blundering	harangue	vituperation	aphoristic	gayety	freudians	interpersonal	wellintentioned	cancels	simplification	counterfactual	flaw	misinterpretation	underreporting	therapeutic
80	individuality	phe508delphe508del	animadverting	mattere	metaphysical	ourself	navigation	resourcefully	artifice	unsought	helplessness	indecency	sentimentalist	meticulousness	diabolic	foredoomed	neurotuberculosis	maldistributed	recalcitrance	harm	nonrepresentative	government
81	spastic	kristnesi	mushrooms	arrogated	asperity	token	nutritional	deception	beneficence	taunts	lauguage	sufferance	hacknied	characterology	complacence	relinquishment	misinterpretations	overadjustment	nonrepresentative	robustness	narrative	staff
82	papaver	galathea	magnum	ciliÃ©s	espionage	disarrange	unconstitutionality	quixotic	deprecation	unbelief	seemns	rationalist	stereotyped	discomfiting	subconscious	stratagems	obfuscate	overemphasizing	underdiagnosis	error	pqrs	functional
83	network	v586m	histrionic	gloat	disabused	fastidiousness	schedule	espionage	beguile	vindictiveness	ofwhat	connivance	vituperation	presupposed	wrongness	misinterpretation	faulting	overestimating	cointervention	overestimating	noncomparability	identification
84	trench	pumpfuls	asphenamine	humbugged	halfhearted	thiugs	employees	generalization	untrammelled	rescue	oavii	filthiness	laudation	improbabilities	invalidation	misjudgment	imprecisions	imitative	unrepresentative	recalcitrance	methodologic	direct
85	nursing	c19mc	nifla	proselytes	howsoever	dabblers	dominant	sacredly	misconstruction	slackness	woful	thieving	juryman	crossexamination	libelous	consensus	heterosexuality	noninformative	underestimating	noncausal	dissatisfaction	pandemic
86	narration	npu	fuiled	slandering	palliation	misapprehend	disaster	atrocity	arrogating	docility	divinely	cowed	derogate	multidetermined	vieav	imponderables	analytic	misreporting	overgeneralization	nonparticipation	weighting	development
87	atlas	calad	rcvaccination	guileless	unwisdom	steal	tyrannize	cireumstances	compassion	presumptuously	staking	dispossess	stigma	unsafe	procedural	overadjustment	blinded	diflerences	posteriori	unrepresentative	deception	site
88	ecchymosis	govitecan	adifferent	fascinations	averring	overmastering	helper	hallucination	equality	garrulity	disclaiming	laudation	cxpress	bailiwick	inexactness	unresolvable	syllogism	misperception	differenc	nonlinearity	missed	place
89	felis	s672r	tyrannize	vilify	interpretation	disown	conformity	unchristian	benevolence	uproot	affirmations	fairness	prolixity	empathetically	generalizes	recalcitrance	stigmatization	ervors	study	nonrespondent	conduct	history
90	religion	galcanezumab	partialities	jugglery	blinded	propricty	habitat	unrighteous	rascality	obloquy	avows	misconception	ecritical	sinfulness	thoughtlessness	coverup	adjustment	overestimation	misconception	nonrepresentative	reestimation	surveillance
91	ulcerative	hu5f9	dubourque	incompetence	neeessity	dependence	pensionnaires	unsought	insubordinate	hisown	ridicules	selfconfidence	reticence	deemphasis	syllogism	libelous	misjudgment	dissent	industryfunded	astreated	nonlinearity	multiple
92	pollen	misrecognition	vegetative	hellish	agaiiibt	comprehension	dualists	conventionalities	allopathists	heterodoxy	disabused	decencies	questioner	transpersonal	forewarning	gratuities	hunches	quasiexperimental	nonrandom	discrepant	stigma	changes
93	insipidus	n252s	shaming	defame	consumer	ostracize	unregenerate	benevolently	orthopedist	squeamish	swerve	egoism	unwisdom	appealingly	insincerity	semantically	disparity	reanalyze	generalizability	nontrivial	selfselection	record
94	poverty	hfmse	dualists	oavii	deigned	opiniÃ³n	helief	docility	impolitic	irked	himsclf	inveighed	prejudice	scnse	uncontested	imprecision	underestimating	recalculate	skewed	postrandomization	nlst	his
95	rous	suckering	nihcc	spur	flimsiest	construct	reactive	outraging	conciliated	basest	unpractical	legalisms	minutie	knowlcdge	meticulousness	overspecialization	denial	missed	misinterpretation	skewed	censoring	respect
96	achilles	autotoxicoses	sniping	purlieus	suggestedthat	haply	sadness	exclusiveness	ratiocination	narrations	unbelief	uncharitableness	deprecation	punishment	longrange	arrogation	norms	attitude	unethical	pharmacogenomic	overfitting	persistent
97	acer	hispanos	onyalai	hopethat	prudish	agaiiibt	lotus	cowed	disrespectful	foist	sarcasms	harangue	hypercritical	impulsive	predisposition	elaborations	jjudgment	stochastically	discrepant	underdiagnosis	timeseries	second
98	regulation	nonautopsy	sufticient	nobleness	tolerance	sin	refractory	stigma	unlettered	helping	wiscly	beguile	avowedly	semantically	ineptness	selfdiscipline	unsystematic	anccdotal	problem	shepherding	overtesting	small
99	hybrid	vicine	draav	impeached	carclessness	discountenancing	null	unhesitating	reproaches	any7	guiltless	prostituted	belittles	sidedness	irrelevancy	difficuit	remedial	definitional	disparity	collinearity	experimentation	unknown
100	progression	eskd	footl	partizan	unceremonious	externals	embarrassment	absolves	agaiiibt	flippancy	elaims	jibes	triviality	fairminded	grudges	simplifications	satisfaction	nonmetric	riskbenefit	unresolvable	metadata	environmental
101	exostoses	inbuild	seein	accessory	unpractical	commuuity	veterinarians	slanders	andthey	disconcert	unafraid	exalts	preciseness	fantasy	stems	unexciting	thatan	judgment	misperception	discrimination	noninformative	learning
102	hostility	contralesional	tonsillitis	parlies	andthey	innate	hybrid	rascality	hisown	fairminded	fealty	untrammeled	hyperkinesis	patientdoctor	denigrating	idealistically	unexamined	intrafamily	confounds	flaw	anonymized	transmission
103	ganglia	foundationone	alimited	preferences	cognisant	andthey	alliance	transgressor	juryman	staking	doubter	sentimentalist	togetherness	dramatization	prejudicing	impersonality	decision	overoptimistic	replicable	predonation	selfreporting	recognition
104	crocus	methoxyethyl	acquittals	illiberality	anolher	avcll	cycle	callously	dotage	pettiness	iconoclasts	discrimination	contentiousness	nonstatistical	traps	selfinterest	unethical	alexithymia	feasibly	colonographic	oversampling	only
105	coiled	neph1	rhapsodies	aplace	avholly	minutie	steal	rebuking	indelicacy	abstractly	imperturbability	shiftlessness	intuition	actualization	illogically	intangibles	covenantal	miscommunication	untestable	differenc	suggestion	testing
106	coccyx	tisagenlecleucel	licensing	decencies	w7hich	scoffing	bacterial	disputes	littleness	importunities	prepossession	incitement	praectitioner	unsurmountable	subtler	misattribution	pronouns	flaw	overrepresentation	recalculate	acceptance	recurrence
107	swiss	ipsilesional	contamination	calumnious	mushroom	averring	occult	conformity	stultified	stultified	belittles	punishment	vaunteth	teleological	misattribution	selection	misclassifications	predonation	dcgs	prescreening	recalculate	abnormalities
108	cavae	ivosidenib	praectitioner	indecently	intellectually	gloat	rejection	defamation	writteu	suflerings	practioner	unfaithfulness	unsettle	forewarning	consequentialist	nonmetric	nonconcurrent	ascertainments	error	retrospective	adherence	airway
109	americanus	altmetrics	glamorize	connive	evitable	vindictiveness	stereotyped	prostituted	repentance	avord	demagogue	poavers	wordiness	betokens	evidential	unimpressed	deducing	pitfall	discordance	generalizing	precision	global
110	sport	gnomad	dissatisfaction	censuring	equality	pastoral	huschke	deceives	disconcert	admonishing	writteu	docility	scoffing	subjjective	unacknowledged	overoptimistic	preference	confounder	adverse	geneexpression	motivation	discharge
111	reinforcement	evobrutinib	graphophone	satisly	gaiu	reasous	cumulative	prevarication	humbuggery	selfreliance	enthu	revengeful	unsystematic	subconscious	doctrinaire	tendentious	unrepresentative	methodologically	reanalyze	samplesize	misreporting	persons
112	crest	reactiontype	oxone	slovenliness	somchow	recreant	desirability	untruthful	insincerity	affirmations	discourtesy	spying	despairs	extremism	perfectionism	ecthical	diflerences	underreporting	protectionist	selfselection	attitude	vaccine
113	retrograde	higtory	fluency	pedants	aspirations	homeeopaths	dance	obloquy	flippancy	harangue	leniency	supercilious	nonconformist	irrelevancy	environmentalism	overconfidence	inferring	carryover	subjectivity	artifact	qualityimprovement	crisis
114	eyebrows	yhcd	unconstitutionality	westerner	scouted	ethical	narration	foolhardiness	premeditation	fairness	langnage	shyness	forearmed	evolve	characterology	conflict	disillusioning	cointervention	multiplicative	underreported	peer	asthma
115	rarefaction	atp2b2v586m	averring	croakers	prospective	decido	competence	presumptuously	hopethat	cireumstances	mendacious	ineptness	selflessness	rationalistic	moralizing	belittles	shortcut	feasibly	heritability	echocrt	Î´p	systems
116	sarcoma	glyeolysis	phantom	sentimentalist	indecency	doubter	simplification	convietion	unrighteous	shirks	negleet	oligarchy	obtrude	doctrinaire	materiality	disavowing	ascertainment	inconsistencies	inconsistencies	unexpected	nonindependence	gastrointestinal
117	carbuncle	fÎ±	dabbler	miuds	recoguize	dissatisfaction	inspite	disabused	demagogue	resourcefully	complaisant	resourcefully	narrations	inappropriate	preciseness	attitudes	methodology	misinterpretations	undertreatment	desirability	deidentified	tests
118	ants	erdafitinib	arrogantly	sufferance	hisown	logicians	misconception	untrammeled	parlies	strangeness	foolhardiness	renunciation	sureness	unconseious	exculpatory	verbalized	precision	error	influence	noncomparable	theory	life
119	indiana	uige	sadist	seleet	tidiness	toxicophagi	inclusion	abstractly	unbiassed	impertinence	scold	sophistical	misapprehended	dissatisfaction	identity	selfconfidence	caseby	discrepant	skew	overrepresentation	pvbm	series
120	phantom	sptlc1	entrench	gloomily	immoralities	submissively	blast	apologists	questionings	lonesomeness	sacredly	misplacing	basest	readaptation	kven	doctrinaire	specters	nonrandom	unverifiable	analysis2	misclassifying	law
121	scilla	cisgender	transplant	unmanly	specialties	prejudice	distemper	disavowal	shame	recklessness	slovenliness	clamors	unvarnished	overemphasizing	prevarication	fatalistic	stratagems	recalculation	collinearity	recoding	replicable	disorder
122	controlled	betterbirth	helief	suflerings	unexplained	syphilisation	effectiveness	pretexts	inquisitorial	externals	avowedly	tidiness	antisocial	generalization	foreclose	conformity	discounting	evaluators	recalculate	elcap	participantlevel	medication
123	annulare	benedictow	takeovers	phantom	proneness	proselytes	fins	impertinence	sycophant	thoughtlessness	novitiate	uproot	hypnotist	ecriticism	noncomparable	argumentation	metaphysical	unrepresentative	counterintuitive	unethical	attribution	models
124	pars	satralizumab	azina	bewail	conflict	revengeful	cognisant	slackness	guiltless	aspersion	sullice	fairmindedness	contrives	hegelian	batterer	pigeonhole	optimism	sclecting	falsification	multiplicative	overinterpreted	postoperative
125	aphonia	mnis	hivctr	animalcular	besaid	indelicacy	alert	obstructionist	bellicose	indecency	bungler	bluntness	declaim	helplessness	dissuades	anonymity	alexithymia	fairness	timeseries	missed	realworld	active
126	expectorate	dialogic	debore	madhouses	retrograde	misjudge	mast	crossexamination	uature	allured	hopethat	homosexual	extremists	incvitable	surmountable	biased	prophecies	oversampling	overinterpret	selfreports	heuristics	detection
127	pituitary	bpdcn	cebocephaly	traditionary	commuuity	expatiate	artistic	bungler	jurymen	stultify	perseveres	juryman	gooil	formalizing	unconsidered	undercuts	procrastination	unexamined	ctph	reweighted	hmgs	core
128	chilblains	notjust	satisfled	philanthropically	scent	dogmatize	tidiness	distanced	unhesitating	declaim	disconcert	truculent	jjustice	empt	carclessness	crossexamination	overconfidence	unbiased	selfreporting	unblinded	ofcare	cross
129	guidance	elexacaftor	fellowcitizens	requite	sycophant	uninstructive	sport	allopathists	impulsive	unafraid	uncomplainingly	overgenerous	philosophize	contentiousness	irrelevance	inept	deterministic	discrimination	probability	stereotyping	penumbral	line
130	saccharum	elexacaftortezacaftor	deadliness	vouchsafe	adifferent	unsafe	role	scouted	unspotted	poavers	cxpress	freudian	dogmatically	immediacy	elitism	cues	confusion	numerate	outcome	overtesting	hvbp	common
131	plum	themis	catchword	unkindness	chauce	unmanly	dabbler	sham	violator	uncontradicted	thatdr	indecently	stutterer	solecism	unprovable	reward	selfhood	unrandomized	interobserver	informativeness	marginalization	dialysis
132	spur	bvab2	obviousness	damage	conventionalities	hopethat	crush	untruth	allured	overpower	gloat	misconstruction	discourtesy	unwisdom	patently	denigrating	feasibly	lefthanders	bimodality	posteriori	perprotocol	acquired
133	gustatory	bace1	obsolete	boastfully	disputes	ennobles	thefacts	disloyal	degradation	ingenuousness	weakling	taunts	exasperation	concreteness	resentments	wellintentioned	eugenic	possibilitics	hmgs	acas	commenters	resolution
134	capsules	gastroptosia	adaptedness	subserviency	principie	toknow	alreadybeen	unpunished	tidiness	partizan	lithotomists	partisanship	forthrightly	absolving	irresolvable	pervasiveness	unresolvable	posteriori	acas	limitation	spillover	adult
135	labyrinth	esketamine	insanely	achievement	ecivilization	asthey	aberrations	individuality	thraldom	courage	weightier	unafraid	glamor	fairness	holistic	unemployment	grounded	jjudgment	testable	studies9	posteriori	inclusion
136	pericarditis	rs72613567	comparo	adverse	fanatically	unrighteous	developmental	impeached	blinded	disarrange	naivete	trivialities	enthusiasms	batterer	sidedness	endangered	discrimination	eflectiveness	discrepancies	randomize	untestable	covid
137	loop	ontologies	eirculation	iwill	panic	littleness	endangered	distrusted	aspersion	benevolently	avorks	aggressive	fulsome	woeful	ecthical	ineptness	prejudiced	preferences	overfitting	suggestion	unblinding	social
138	sphenoid	kratom	spoonfeeding	blasphemous	disloyal	pardoning	disfigurement	disavowing	prating	cleanness	impiety	biassed	recreant	meshing	proneness	interject	ineptitude	nonrespondent	nonadherence	fprp	mssp	guidance
139	mentha	plazomicin	wellordered	competency	homoeopathist	perverseness	arrogantly	jugglery	intellectually	exclusiveness	untrustworthiness	liturgy	prepossession	utilitarians	taxonomies	misapprehension	tendentious	skew	phantom	noninformative	nonreporting	toxic
140	pattern	inotersen	stuttering	captors	pasb	autocrats	instability	broadminded	slackness	misconception	mendacity	denigration	deception	homosexual	unresolvable	unscientifically	inadequacies	noncausal	nonindependence	ifhs	outliers	facility
141	reflux	imdc	fulfiled	criminals	orthographical	medically	spur	aggressive	regretful	enthusiasms	understudy	avholly	utilitarians	prudish	incisiveness	organizers	ancedotal	editorialize	forgivable	overfitting	riskfactor	cluster
142	bomb	tagraxofusp	brimful	chiefest	oaving	laudation	proneness	expedience	complaisant	diserimination	littleness	strangeness	hairsplitting	reworking	alack	wrongdoing	institutionalize	process	enticement	counterintuitive	generalizability	emerging
143	pore	gppga	medicinalis	havoe	impeached	insanely	mesmerism	defense	persecute	unpractical	paraphrases	stoicism	staking	miscalculations	misconstruction	callously	defensible	iterations	nonintervention	counterintuitively	preapproval	laboratory
144	antrum	httrx	nasem	literati	mice	carclessness	reinforcement	staking	wofully	unshakable	chiefest	interlocutor	calumnious	psychopathologists	rephrased	selfreporting	invulnerability	misclassifying	crossovers	unverifiable	minorities	form
145	cleansing	verubecestat	configure	unbelieving	inures	patentees	wolffian	secresy	defile	subterfuges	shopworn	refusal	bewilders	modernity	deemphasis	quibbling	overoptimistic	unverifiable	nonrespondent	reestimation	selfreports	children
146	values	spaceflights	pretexts	responsibilty	reuder	suflerings	uuderstood	unkindness	competence	unfaithfulness	adjudge	quixotic	humbugged	illogically	halftruths	unsurprising	nontherapeutic	propensityscore	propensityscore	overfitted	decra	adherence
147	enamel	hypertyraminemia	behindhand	mercenaries	bantingism	cortainly	ceremonial	censurable	convietion	allopathists	supererogation	flout	egoistic	encumbrances	actinica	fairminded	interject	undocumented	masking	inappropriate	astreated	reduction
148	delusions	cabotegravir	interrogative	conflict	presumptuously	rescue	degradation	unreasonableness	depreciatory	youhave	phthisiologist	competence	mystify	overwritten	smugness	psychoneurotics	overemphasizing	indced	cthically	adverse	equality	prolonged
149	peas	kasivisvanathan	proneness	comprehension	corred	infinitesimals	trail	sacrilege	bluntness	discountenancing	dabbler	regretful	boggles	wrongness	feasibly	eflectiveness	contagion	industryfunded	reweighted	errors	unblinded	problem
150	blast	monkeys	misrecognition	byword	iuflueuce	satisfled	personnel	carclessness	adjudge	broadminded	opprobrious	slovenliness	straightforwardly	behavioristic	misinterpreting	misperception	undocumented	comparability	selfreports	deferral	carryover	facilities
151	buttocks	disaster	blinding	stigma	weknow	mendacity	genetic	stultify	requite	partialities	unpunished	acquiescent	doctrinaire	meagerness	parochialism	receptiveness	mainstreaming	hdfp	prespecification	analysis3	telemedicine	pregnancy
152	equity	givosiran	ceremonial	aggression	wdiatever	bimply	pilot	stultifying	discourteous	cheapen	heterodoxy	enthusiasms	repentance	disavowal	hairsplitting	mislabeling	weightings	enticement	fecundability	overdetection	imputation	disorders
153	hemicrania	enterobactin	seeured	thraldom	intendance	degradation	tool	leniently	traditionary	preciseness	quaintness	unobservant	unpractical	obstructionist	remoteness	egoism	underdiagnosis	ambiguity	astreated	anonymized	preplanned	safe
154	evali	bvab1	uncontradicted	reprobation	expostulation	foolhardiness	insummary	theindividual	impeached	opprobrious	escapades	prudery	avord	selfeducation	noncausal	nondifferential	ervors	samplesize	replicability	masked	multiplicative	fever
155	alliance	african	noisiness	unpreparedness	obtrudes	dbut	gastroptosia	discriminate	avowal	disavowal	jjustice	instinct	underrates	unprovable	woeful	stems	design	subjectivity	flawed	validations	analysis2	combined
156	p1025	gastrecstasis	elung	infidels	exotic	supineness	miners	guiltless	meddlers	asperities	howsoever	brutalizing	indiscriminating	sham	uncorroborated	nurtures	improbabilities	prejudice	nonrunners	timeto	noncontrolled	products
157	flashes	newco	deficiencies	loggerheads	unconstitutionality	hydropathy	rcvaccination	crudest	pettiness	informer	vindictiveness	militaristic	grudges	transgressor	aloofness	objectivity	preconceived	invalidates	stereotyping	stochastically	falsification	drugs
158	eteplirsen	ccca	audiphone	opinionof	dismemberment	crities	plumbing	humbugged	egoistic	incitement	transcendentalism	sentimentally	indecency	zilbergeld	endangered	misinterpreting	randomize	nonrunners	ambiguity	interobserver	imputations	self
159	mitis	annua	pointout	dissensions	scoffing	recoguize	pretexts	egoism	faithless	saythat	prejudge	despising	blamable	perplexes	weightier	falsification	slights	usclul	postdisaster	covariables	noncomparable	natural
160	mustard	pi3kÎ³	disturbers	taciturnity	chattel	helplessness	dual	encumbrances	overgenerous	inflictions	indiscriminating	grossness	wiscly	concerningthe	anticlimax	batterer	dissent	innumeracy	randomness	study4	nonpersistency	general
161	quackery	smartwatch	blot	fuiled	illusions	unmutilated	counseling	swerve	futurity	obviousness	sobered	prospers	stodgy	juxtapositions	coherency	eriticism	permissibility	erroncous	reestimation	ctph	influence	state
162	milasen	subcommunes	mnost	felicitate	undeceive	rejection	rage	allured	fastidiousness	detest	acquiesces	littleness	supercilious	empirical	inheritors	optimism	refusal	adverse	diflerences	imbalance	usability	refractory
163	klhl11	azina	higtory	unspotted	toxicophagi	thonght	humoral	arrogating	selfrespect	prepossessions	futuro	shyster	amaze	callously	diffuseness	crrors	adjjustment	interlaboratory	undercounting	misclassify	refusal	contact
164	abies	sgrna	dumbfounded	pugnacity	haply	subserviency	unexplained	overgenerous	cireumstances	supposititious	engrosses	forece	rebuff	presupposing	mishandled	liberalizing	preselection	nonintervention	definitional	rescreened	weightings	suicide
165	efficiency	snowblower	inview	marvellousness	significance	fuiled	alimited	unworthiness	pursuer	mendacity	excusing	hisown	doubters	disfavored	noncomparability	comprehensibility	suppositions	imprecisions	nonlinearity	underuse	FALSE	gastric
166	terrors	commissures	quadagno	interlopers	ifwe	stultify	deterioration	debasing	externals	mood	confrÃ©res	reproaches	frills	preciousness	predetermination	educationists	relativism	adjustment	interracial	weightings	adverseevent	vaccination
167	larva	cesalpino	misconception	seethe	tobring	rebuff	caloric	filthiness	shamming	chiefest	untruth	meanness	straightforwardness	wellintentioned	disbelieved	juxtapositions	toidentify	glosses	satsa	nlc	reran	emergency
168	costal	ic31	capitally	montesquieu	externals	undiscriminating	inwardness	sufferance	thephysician	disabuse	ecclesiasticus	flagrantly	intuitions	scientism	certainties	insularity	confounding	optimism	ervors	dmist	customization	policy
169	precursor	oroyo	exploratory	impostures	arrogantly	unregenerate	euthanasia	construing	submissively	indiscriminating	befogged	selfrespect	partizan	puzzlement	impermissibly	forewarning	miscoding	jjob	nonshared	overgeneralization	costbenefit	men
170	fairness	prolapse	straitjacket	ennobles	immutability	writteu	cluster	fabrications	jibes	anger	pessimism	distanced	haggling	arbitrariness	discriminately	difliculties	falsification	misinterpreting	shortcut	assistedreproduction	awareness	severity
171	rickets	Î´od	tellectual	ripest	misapprehend	hate	sniping	inveighed	religionists	disdaining	disavowing	diserimination	certainties	attributes	artificiality	callousness	consequentialist	assistedreproduction	intrafamily	feasibly	populations	mental
172	grief	dapsa	educational	avilling	avcll	persecute	unstable	repudiating	impiety	indirection	sagaciously	sadistic	vindictiveness	upmanship	verbalized	ambiguities	unbiased	malpractice	recoding	informedconsent	misperception	training
173	uncombable	telecardiography	prune	quackish	minutie	reuder	identification	affronted	conventionalities	andthey	unpreparedness	proselytizing	unflappable	picky	overprotective	diffuseness	psychogenic	studices	underemphasis	trivialize	lag	symptom
174	meninges	now7	quicksand	scourging	dbut	parlies	sharing	clashing	scrawls	unreasonableness	fuiled	disavowal	apologists	coherency	unlikelihood	separateness	exculpatory	unstandardized	postrandomization	unvalidated	reanalyze	hot
175	onset	padi3	buffoonery	deceivers	overborne	materialists	delusional	partizan	uproot	heroics	glowingly	pauperized	aloofness	insincerity	depreciatory	nonacceptance	geography	bimodality	misinterpretations	overinterpreting	recalcitrance	bleeding
176	isolated	manaca	lauguage	vouching	disarrange	indecency	hisown	blackmailing	decencies	tloes	perfectionist	obstructionist	sidedness	evasiveness	overestimating	attitudinal	enticement	overtesting	imbalance	stratifications	hospitalspecific	influenza
177	stimulation	fp250	ueeded	homoeopathist	opiuiou	unpunished	claw	thieving	monomaniac	toomuch	religionists	damnable	altruism	wholesomely	appealingly	overcautious	preconceptions	evidential	incongruent	perprotocol	dcgs	term
178	bland	recentyears	predatory	phase	phantom	prepossessions	cervicitis	degradation	uncomplainingly	disabused	prudish	irked	denigration	generalizes	overgeneralization	easygoing	testable	discrepancies	overdetection	awareness	cpoe	asymptomatic
179	lichens	aporphines	uuderstood	abides	bruited	anticipation	satisfled	misconstruction	constructiveness	unpunished	confessing	ratiocination	opprobrious	subjectivity	oedipal	innuendoes	irrelevance	permissibility	monozygosity	nonadditive	imbalance	right
180	cilia	inclisir	diagnosed	emasculate	excuso	appal	peer	torturers	agitator	greediness	ingenuousness	immutability	argumentative	inculcating	concerningthe	formalization	policy	deception	underrepresentation	uncertainty	prespecification	stable
181	stain	comunidade	dowith	acerue	oavii	oligarchy	autocrats	heedlessness	prostituted	grossness	prosy	absolves	teleological	unescapable	persuasiveness	subsystem	numerate	alcoholrelated	innumeracy	dichotomization	interact2	devices
182	ink	enslaved	willhave	impolitic	realizo	obligations	mimais	uncharitable	thiugs	unhesitating	commonplaces	intellectually	witticism	trivialize	overconcern	longrange	microeconomic	nonctheless	heuristically	overoptimistic	kcps	gas
183	emergencies	validity	opinjon	faithless	behindhand	discriminate	undiscriminating	overpower	vilify	scrawls	biassed	shortsightedness	unafraid	downgrading	intuition	falsifiable	psychodynamic	screeners	retrospective	problem	timedependent	food
184	humoral	drilon	cbme	despot	rebuff	mighl	pseudomembranous	vivisectors	helplessness	fascinations	marvelled	deprecatory	obstructionist	deontological	superradical	undesirably	inappropriate	randomize	interrater	heritability	dichotomization	types
185	transference	aspree	achievement	ethical	boastfully	usefuluess	cataleptic	obtrudes	competency	fastidiousness	studeut	unconcern	whois	sophomoric	reticence	pertinence	mislabeling	preselection	nonexperimental	analytic	judgment	regulatory
186	peduncle	acam2000	superadd	vindicates	fascinations	distrusting	vulnerable	churlish	filthiness	acceptance	flatters	untruthfulness	overhear	expectable	validity	reworking	counterfactual	geographic	predisaster	subanalysis	skewness	recurrent
187	striatum	alert	obturator	hereabout	unrighteous	sacredly	invertebrates	deprecation	unpreparedness	refusal	procrastination	harrowed	openmindedness	ecritical	irreducibly	legitimized	semantically	stratifications	mddrgs	innumeracy	overfitted	eye
188	lumpy	pereival	wtork	peaceably	miuds	faithless	inflorescence	vaunting	recoguize	unburden	aunthor	connotative	appealingly	unexciting	mishmash	overinterpret	nonmetric	conformity	understate	dropout	overinterpretation	neurofibroma
189	optical	apep	reor	pretexts	woidd	insubordinate	adaptedness	blasphemous	carclessness	confessing	recantation	automatism	trivialities	sentimentalist	receptiveness	taxonomies	recalculate	probability	overfitted	blooddonor	collinearity	molecular
190	mfsd8	microbion	benedictow	unmingled	shamming	fickleness	fÃ©lida	ineptitude	whois	tactless	overawed	prepossession	eritic	connotative	unsystematic	selfselection	attribution	desirability	skewing	ascertainments	inequality	without
191	rescue	individuality	hesitance	obtrudes	panhandling	thefacts	denial	adducing	enunciating	dogmatize	psychopathologists	optimism	uncharitable	vyet	jjustify	explicitness	attributions	counterarguments	zygosity	participantlevel	postintervention	agent
192	omadacycline	cxm	aralue	scurrility	digressive	device	administrative	religionists	dignify	prevarication	thehistory	degradation	divulging	aloofness	empirical	precision	nonverbal	sonographer	artifact	noninterventional	caremanagement	milk
193	labor	hares	somowhat	innate	fickleness	unobservant	neeessity	toomuch	imperturbability	supineness	toknow	grudges	levity	serviceability	indirection	overestimating	screeners	neurotuberculosis	costeffectiveness	protectionist	prostatecancer	distribution
194	strychnos	zaenglein	altitude	intuition	thiugs	interpretation	usefuluess	iconoclasts	disavowal	easygoing	flippancy	panic	diplomacy	overoptimistic	discrediting	disillusioning	nonparticipation	discriminately	covariables	cacs	nonproportional	infections
195	castration	452198	insummary	hate	straitjacket	stultified	dandruff	rebelling	sentimentalists	theleast	salacious	rebuking	enquiring	giftedness	outweighing	illegibility	denigration	ecthical	randomize	prespecification	grounded	vaping
196	beak	lgbtq	diskogenetic	writteu	parried	theywould	unobservant	trumpeting	scouted	oavii	scornfully	cleanness	overdrawn	selfdestructive	erroncous	broadness	validly	prerandomized	nonproportional	underestimate	minimization	peged
197	deprivation	nod	statetl	humiliate	rcvaccination	incumbrances	percepts	rationalist	stigma	repentance	cherishes	steal	diplomatically	stigma	readaptation	overextended	objectivity	recall	stratifications	studygroup	postapproval	surgeon
198	seminal	burosumab	progenitor	benedictines	disbelievers	gaiu	ennobles	enunciating	impertinence	revengeful	evolutionist	moneymaking	eriticism	fantastical	rationalized	ultraconservative	breakthrough	probabilitics	longitudinality	preprocedural	fbat	essential
199	ligelizumab	prearrival	gallicisms	disloyal	tyrannize	preoccupy	regenerative	partialities	dissatisfaction	insinuation	egoistic	vindictive	evasions	denigrating	improbabilities	provable	upro	conservative	assistedreproduction	misperception	meaningful	brain
