# Supplementary material for: Insights from full-text analyses of the Journal of the American Medical Association and the New England Journal of Medicine
Source: eLife. 2022 Jul 7;11:e72602. doi: 10.7554/eLife.72602 (PMC9262397; doi:10.7554/eLife.72602)
Supplement: Supplementary file 7. [file elife-72602-supp7.xlsx]

## Sheet: eTable_6_defective_JAMA
	1880-1889	1890-1899	1900-1909	1910-1919	1920-1929	1930-1939	1940-1949	1950-1959	1960-1969	1970-1979	1980-1989	1990-1999	2000-2009	2010-2019
1	calorification	impaired	defeetive	defeetive	defects	mentally	impaired	impaired	impaired	chemotaxis	eukaryotic	mutant	mitochondria	tlr1
2	deficiency	defects	impaired	defects	impaired	defects	defects	defects	fibrinase	defect	defect	ribozyme	cftr	autophagy
3	malnutrition	malnutrition	imperfeet	defect	poor	poor	congenitally	retardation	abnormal	impaired	mitochondrial	fasl	mitochondrial	pvhl
4	abnormalities	defeetive	defects	defeets	mentally	defect	abnormal	congenitally	defect	glycosphingolipid	progenitor	germline	autophagy	cardiomyocyte
5	nil	imperfeet	deficiency	poor	abnormal	congenitally	retardation	defect	recessively	suppressor	mutant	genetically	ryanodine	cd47
6	imperfeet	retardation	deficiencies	mentally	defeetive	cardiopathic	mentally	mentally	prtase	antiglomerular	clone	deregulated	pvhl	tlr2
7	impairment	defect	abnormal	abnormalities	congenitally	idiot	cardiopathic	abnormal	neurovisceral	fibrinase	retroviral	oncogene	misfolded	mfn2
8	deciduous	nutrition	defect	abnormal	defect	aberrations	unstable	impairment	congenitally	mitochondrial	genetically	phenotype	sod1	hmga1
9	emotional	congenitally	imperfect	impaired	cardiopathic	offspring	blind	poor	deficiency	leukotactic	gene	fibrillin	mutant	txnip
10	immobility	impairment	mentally	insuflicient	impairment	defeetive	poor	deficiency	heterozygotic	neurofilament	chaperone	deletion	degradation	mapk
11	middens	disturbances	anomalies	malnutrition	deafmutes	impaired	defeetive	disturbances	defects	xlp	episomal	imprinting	upregulated	shrna
12	deficiencies	deterioration	insuflicient	deficiency	anomalies	feebleminded	defect	aberrations	sexlinked	dynein	fasl	translocation	cytoskeleton	rtp801
13	strains	unstable	function	disensed	retardation	certifiable	abnormalities	mutism	deficient	hgprt	mutation	recessive	fibrillin	fasl
14	cementum	aberration	poor	parents	deficiency	defectiveness	adolescent	abnormalities	abnormality	cilia	aberrations	mtdna	microglia	tcl1
15	hyperamia	deficiency	perverted	ehildren	defec	deficient	faulty	abnormality	nondisjunction	activation	ribosomes	retroviral	ampk	sod1
16	enfeeble	malformed	nutrition	idiot	malnutrition	hereditary	mutism	depressed	infantilism	mutant	immunoregulatory	ligand	defect	mrnas
17	enfeebles	aberrant	defeets	blind	disturbed	retardation	anomaly	dentition	dysgammaglobulinemia	degradation	lysosomal	cftr	nigra	atrx
18	septal	aberrations	faulty	congenital	faulty	children	idiot	pica	disruptive	microtubular	autoreactive	all1	chaperone	cleavage
19	defect	calorification	ideation	attitudes	abnormalities	blind	dominance	microcephaly	galactosemic	phosphoribosyltransferase	antigenspecific	superantigen	mfn2	costimulatory
20	anomalies	instability	instability	neurotic	parents	defectives	mongolian	faulty	tarded	derepression	chemotaxis	repressor	mtdna	transactivation
21	hypersemia	abnormalism	fechle	congenitally	blind	inborn	epileptic	unstable	pfk	ribosome	immunopathogenic	netically	mapk	apoe3
22	disarrange	abnormal	inborn	imperfeet	congenital	imbeciles	deterioration	dysfunction	hyperglycinuria	defenses	macrophage	glucocerebrosidase	substantia	pi3k
23	adjustment	abnormalities	deterioration	feeble	deficients	developmental	malformed	defeetive	trisomic	lympholysis	genetic	chimeric	ankyrin	repression
24	parental	imperfect	congenitally	criminals	deficiencies	imbecile	incorrigibility	deranged	autosomally	aberration	phagocyte	constitutively	mrnas	mutationsin
25	metabolism	imbalance	anomaly	mental	disturbances	parental	visually	cardiopathic	thrombocytopathy	prtase	derepression	ribozymes	represses	constitutively
26	vocalization	imperfection	imperfection	anomalies	children	fecbleminded	malingering	phenylketonuria	impairment	pfk	immunocytes	derepression	mammalian	pseudogenes
27	dependent	malformation	pavents	imbeciles	underheight	incorrigibility	criminals	disturbed	okn	asialo	expression	subunits	posttranscriptional	creb
28	distortion	intellection	prenatal	instability	deficient	parent	malformations	secondary	zygote	incomplete	antibodydependent	mutation	deregulated	haploinsufficiency
29	sapreemia	weakness	impairment	imbecile	mental	weakminded	disturbances	retarded	agamma	nephrons	locus	dendritic	huntingtin	oligodeoxynucleotides
30	abnormities	extrinsic	excessive	inherited	deranged	malformed	impairment	dysphonias	insensitivity	cellmediated	autophagy	mutants	drosophila	melanocortin
31	rearing	depraved	perversion	hearing	instability	healthy	imbeciles	excessive	inappropriate	sequestration	phagocytes	rb1	constitutive	mdm2
32	cleanli	deficiencies	functional	excessive	adults	recessive	normal	malformed	repression	megakaryocyte	ribosomal	dax1	downregulated	pomc
33	trauma	psychopathic	depuration	lnck	siblings	abnormal	inherited	impairments	orchidism	chÃ©diak	bacteriophage	autoreactive	myocytes	progranulin
34	asymmetry	primitive	aberrations	certnin	certifiable	deformed	deafness	deficient	orotic	inborn	humoral	ccr5a32	epigenetically	downregulated
35	exireme	inherited	insufficiency	deficiencies	imbeciles	criminals	overweight	offspring	hyperamino	neurovisceral	scid	diseasecausing	aquaporin	aberrant
36	swoons	nutritional	aberration	teeth	persons	mental	neuropathic	deterioration	inherited	congenitally	translocation	mfn2	siah1	igf2
37	overstrained	masticatory	deranged	incorrigibles	denture	deficients	psychotic	achondroplasia	ratelimiting	nonthalassemic	cellular	transeription	pomc	transthyretin
38	extrinsic	impressible	degencracy	defectives	defectiveness	child	instability	instability	mutism	immunocytes	rna	mrnas	encode	mtor
39	decompo	anomaly	errors	pavents	acquired	inherited	rejection	precocious	homocystinuria	hyporeactivity	alloantigens	tcell	tachykinins	oncoprotein
40	slacking	faulty	failure	anomaly	inferior	mutism	impairments	borderline	oligophrenic	lysosomal	reconstitution	polyadenylation	adipocytes	upregulated
41	apncea	fusion	metabolism	disturbances	excessive	faulty	offspring	institutionalized	accelerated	humoral	tcl1	evolutionarily	rnasel	mutant
42	rervous	deranges	retardation	retardation	criminals	correction	blindness	malformation	deficiencies	microfilament	ribozyme	xlp	lysosomal	zap70
43	aÃ©ration	neural	lnck	nutrition	vision	mongolian	deformed	disorder	xlp	complementmediated	fragile	alÃ­eles	glycogen	epha4
44	aberration	neonatal	nutritional	disorders	degencrates	delinquents	abnormality	dominance	fructokinase	endocytic	actin	pmp22	constitutively	huntingtin
45	stapes	function	weakness	impairment	deformities	premature	dentition	normal	poor	ada2	ribozymes	pomc	aberrant	hmgai
46	fÅ“tal	metabolism	disturbed	erippled	imbecilic	malnutrition	developmental	hydrophthalmos	mutase	inhibition	superantigen	mutationsin	apoe3	prostaglandin
47	developmental	proneness	esotropia	sexunl	malocclusion	improvable	fecbleminded	inherited	disorder	achr	myelin	antigenspecific	creb	proliferators
48	hypereesthesia	dependent	obliquities	habitual	retarded	deficiencies	rejectable	mating	fibrinogenolysis	postmitotic	supergene	thalassemia	igf2r	tissuespecific
49	recession	skeletal	depraved	fecble	incorrigibility	hypoplastic	binocular	imperception	dysmature	intermedia	phenotype	replicative	diseasecausing	nonstructural
50	neglected	incomplete	neurotic	defec	defeets	criminalistic	sexually	diplegic	hyporeactivity	sarcolemma	adipocytes	protooncogenes	spectrin	translocation
51	extinction	depuration	resulling	parental	hereditary	juvenile	myopia	idiot	triosephosphate	translocation	desmosomal	abrogates	senescence	cxcr
52	impaired	resulling	abnormality	insunity	malformation	defec	disorder	dysfunctions	anodontia	microfilaments	hybrid	xlinked	scn9a	chromatin
53	hwmorrhage	mechanisms	sexunl	individunl	neuropathic	dependency	distortion	vocationally	aberration	antiparietal	cellmediated	posttranscriptional	dysregulated	drosophila
54	overplus	bodily	overerowding	degencrates	low	disturbed	sexuality	aggression	homocystinuric	reutilized	oncogenic	mitochondrial	rpe65	xct
55	tranmatism	inborn	strain	deformities	feeble	retarded	temperament	malnutrition	myelopoietic	immunohematological	replicative	costimulatory	killin	mmrna
56	motility	functional	disensed	infunts	anomaly	imbecilic	obliquities	higher	incompatability	ectodermal	costimulatory	rac2	antiapoptotic	overproduce
57	hypereemia	neglected	inherited	children	recidivists	psychopathic	xerophthalmia	disorganized	schizoid	extracorpuscular	sarc	transcriptionally	nitrosylation	eml4
58	unstable	affective	parental	backwardness	incorrigibles	deficiences	correction	habitual	dissocial	thrombocytopathy	tcell	xyy	astrocytes	hnf1a
59	hzmorrhages	hypermetropes	civenlation	dementin	feebleminded	dentition	malformation	deformed	hematogenesis	immune	endothelium	bnab	caspases	upregulation
60	wasting	reproductive	perception	neuropathic	demoralization	intelligence	emotional	dysgenesis	unstable	phagocyte	dsg3	ctls	upregulate	degradation
61	inharmonious	atrophies	stigma	insanity	insuflicient	disturbances	schizoid	delayed	somato	scid	bnab	pla2s	ubiquitin	complexes
62	radiation	disabilities	orientation	disturbanees	backwardness	congenital	legless	overnutrition	secondary	postreceptor	glycosylation	transgenic	costimulatory	coreceptors
63	ansmia	sexuality	incorrigibles	individunls	mutism	suckling	persons	incomplete	glycosphingolipid	bu25	neurofilament	2004-10-01	transducing	proangiogenic
64	incus	peculi	abnormalities	perception	intellectually	parents	fathers	visually	aversive	axonal	visna	checkpoint	odorant	intracellular
65	leakage	structural	disorder	epileptic	functional	anomalies	vision	child	deranged	tcell	oncogene	variant	bioengineered	cd154
66	coÃ©xisting	degradation	backwardness	defeet	imbecile	adolescent	aberration	aberration	dysautonomia	metallothein	xlp	cancercausing	evolutionarily	aberrations
67	idiot	mobility	neurasthenies	disorder	loss	arridy	parental	disorders	spermatogonia	phagosome	organelles	ubx	kappab	fhit
68	knuckling	apathy	abnormalism	faulty	deformed	imperfection	disturbed	recessive	malformed	overactive	txnip	immunocytes	transposons	siah1
69	superabundant	emotional	overstrain	fechle	inherited	normal	malnutrition	inappropriate	histidinemia	stria	antiidiotypic	dystrophin	p53dependent	abcai
70	ossification	metabolic	intellection	function	maintenance	crime	inequality	dysmature	depletions	autoreactive	activation	kallmann	proapoptotic	proteasome
71	disfigurement	affeeting	impulsive	deficients	illnourished	delinguent	anomalous	aphakia	autosomal	heavychain	hybridomas	singlegene	neurofibromin	eytokines
72	overstrong	civenlation	overtaxes	disturbunces	vocational	deficiency	homosexual	relining	extracorpuscular	achrs	rtp801	stably	kinases	cftr
73	inherited	fragility	mechanienl	childven	fecbleminded	childrem	deficient	predisposition	cellobiase	genetically	keratinocytes	tcl1	pgc	rpe65
74	attrition	malassimilation	feehle	housing	mutes	highfrequency	children	overactive	antihemophiliac	organelles	theimmune	aberrant	uncoupling	deacetylase
75	dentition	suspicional	hypermetropes	errors	adult	testing	disorders	senile	glycinuria	homozygously	bind	brcali	ccr5a32	misfolded
76	vulnerable	poor	calorification	phenomenn	undersized	recidivists	certifiable	parental	hgprt	collagenases	zap	coreceptor	mtor	progerin
77	aneemia	urogenital	anisometropia	mechanienl	defectives	abnormalities	feebleminded	imperfect	glyoxylate	cryoproteins	tissuespecific	cmt1a	endostatin	transactivator
78	morrhages	unexplained	autotoxemia	dependent	idiot	persons	defectiveness	thrive	xxxyy	nondisjunction	repressor	reconstitution	postreceptor	vegfr
79	inequality	excessive	offspring	cardiopathic	disorders	sibling	deficiency	atrophy	underproduction	albinism	autoreactivity	recessives	ubiquitously	cyp2c
80	jurious	neuropathic	volition	constipution	hypoplastic	hypoplasia	dysgenesis	gestational	nonmongoloid	plateletassociated	all1	knockout	chromatin	cas9
81	airin	toxemia	overtaxation	insufliciency	and	incorrigibles	hysterical	heterozygotic	glucose6	autosomally	constitutively	pink1	nonneuronal	cd33
82	impressible	perverted	malocclusion	peculinr	disorder	teeth	psychopathic	intelligence	hemic	melanoblast	mesodermal	noninherited	imprinting	autoreactive
83	fluxionary	formative	degencrates	clusses	hearing	underheight	deficiences	temperament	hereditary	disordering	autosomally	sod1	coreceptor	1alpha
84	refrigeration	distortion	begetting	idiots	insufficiency	abnormality	deficients	atrophic	odontogenesis	antibodymediated	mammalian	pendrin	lmna	srebps
85	accidental	ossification	deranges	disturbanee	living	impairment	hereditary	braindamaged	hypoadrenia	hexosidase	aberration	bnabs	metalloproteinases	disomy
86	molecular	uvea	developmental	offspring	nutritional	secondary	dysfunction	improper	normal	sphingolipid	tolerogenic	gjb2	sarcomeric	hyperphosphorylated
87	codrdinated	maternal	deficient	relutions	minors	function	psychosexual	anomaly	alveolarcapillary	nonmetabolic	edrf	heterozygotic	presynaptic	synthetase
88	cerebellar	mutism	poverty	hereditary	mechanics	stigma	imbecilic	fragile	antiactivator	sexlinked	ctls	provirus	shrna	transducing
89	tympanic	intellectual	fanlty	normal	teeth	disorders	innate	certifiable	hyperactivity	uncoating	nonhistone	antigenpresenting	cardiomyocyte	cd23
90	reproductive	enfeeble	ecriminals	speech	albinism	crowding	neurotic	paranatal	cpds	plasmodia	immunosurveillance	recombinants	mutationsin	hek293
91	deprivation	motility	pereeption	cnuse	cretins	eripples	deciduous	autism	immunocytes	agammaglobulinemic	agammaglobulinemia	cd80	overexpress	proapoptotic
92	depuration	acquired	temperament	neurasthenia	truants	instability	wmental	maladjusted	monotropic	juxtaglomerular	intercellular	pathogenic	adipogenesis	upregulate
93	neoplastic	inhibition	neglected	civenlation	normal	behavior	maladjusted	functional	elliptocytosis	subcellular	nonthalassemic	shank3	gstm1	daxx
94	thinness	volition	overerowded	maternal	aberration	obliquities	adaptation	severe	statural	progenitor	chromosomal	rpe65	pi3k	ribozymes
95	contusing	somatic	organs	beenuse	adolescent	sterilization	monocular	accessory	excessive	poor	alloantigen	autosomally	nitrosylated	hnf
96	splanchnic	fechle	precocious	incorrigibility	defccts	siblings	neural	incorrigibility	disturbances	hypercatabolism	bnabs	immunopathogenic	deactivate	tlrs
97	impaction	obliquities	fecble	sexual	overactive	deafmutes	anomalies	alkaptonuria	hÃ©tÃ©rozygotes	euploid	pseudogenes	transduce	silencing	macrophage
98	aberrations	natural	inharmonious	hypothyroidism	legless	chromosome	pigmentosa	endangered	hyperaminoaciduria	nonhomologous	fusion	shrna	postsynaptic	mkp
99	perinaum	lnck	malnutrition	perverted	only	deafness	brachydactyly	overprotection	dysfunction	aberrant	transducing	pvhl	fasl	msr1
100	unresisting	secretory	kleptomaniacs	incrense	physicaily	eavironmental	insanity	improvable	hyperprolinemia	phosphoribosylpyrophosphate	b19	rtp801	transcriptional	hypomethylation
101	paralyses	inharmonious	idioey	physienl	healthy	nutritional	imperception	congenital	nonfunctional	hyporesponsiveness	tlr1	brcal1	abcai	rb1
102	tracts	codrdination	balance	physieal	the	adjustment	premature	polyhydramnios	abnormalities	dsg3	protooncogenes	rbi	pi3	akt1
103	inexplainable	katabolic	shiftlessness	myopia	juvenile	extrinsic	spondylolisthesis	masculinity	ossicles	endothelial	ada2	paternally	rtp801	retrogenes
104	retractive	enfeebling	crowding	cpileptics	abnormality	deciduous	parents	inbalance	cognition	translocate	endocytosis	tlr1	osteoclasts	endoglin
105	unsafe	acidemia	disturhed	deformitics	deficiences	excessive	imbecile	proneness	mastocytes	neoantigen	lympholysis	intergenerational	mutants	actin
106	panites	pereeption	unstable	failure	deterioration	hearing	underheight	inborn	hypoproconvertinemia	aberrations	metabolically	hmlhi	hypermethylation	etv6
107	environing	elaborative	suspicional	parent	undeveloped	sedentary	deformities	infantilism	degradative	recessively	impaired	disomy	srebps	bdnf
108	enfecbled	disturbed	partial	adenoids	imperfect	vision	defec	catatonia	trisomics	leydig	glycosphingolipid	xlmr	apoptotic	lysosomal
109	plumbing	acutest	illnourished	intellectual	criminalistic	adults	retarded	hereditary	depressed	antibodydependent	poerv	nonmendelian	filaggrin	scn9a
110	equilibrial	inclusion	corrigible	defeetives	hematogenesis	pica	teeth	deficiencies	cystathionine	chondrocytes	recessive	ubiquitously	synapses	retrogene
111	ditliculty	prognathism	activity	enteroptotic	nutrition	rearing	adult	mechanisin	nonthalassemic	megakaryocytopoiesis	degradation	ps1	tlr4	tgfb
112	flushing	defeets	ancestry	correction	overcrowding	unstable	excessive	sexval	inbalance	athalassemia	athalassemia	trim22	scavenge	dimerization
113	rugz	ecauses	disturbances	fatigue	childrem	determiners	deficiencies	imbecile	imperception	vascularis	microtubules	hivspecific	igf2	chemoattractants
114	deterioration	abnormality	imbecile	malformation	visceroptotic	arthrodysplasia	improvable	asthenic	supramedullary	subviral	killer	retrovirus	repressors	protooncogenes
115	disecased	entailment	eriminality	defectiveness	masticatory	homeless	congenital	premature	mutation	eamg	endocytic	athalassemia	hprt	loxl1
116	dizeased	degencracy	somatic	eauses	functiomal	adaptation	scoliosis	autokinesis	genetically	autosplenectomy	fibroblasts	daxx	suppressor	oligodendrocyte
117	vegetative	distinetively	peculiaritics	mutes	deafness	male	hypoplasia	healthy	masking	thymulin	transduce	agammaglobulinemia	tropomyosin	hmlhi
118	fcetal	loudness	dual	corrected	tuberculous	visual	overcrowding	intellectually	retarda	pvhl	membrane	suppressor	acinar	metalloproteinases
119	fiecal	ego	functionation	insomnin	failure	waywardness	threatened	chromosomal	ateliotic	microtubules	ep53	pseudogene	atrx	overactivation
120	hypospadias	swoons	unbalance	secondury	malformed	speech	psychosocial	myopia	immunohematological	autoreactivity	defenses	autoantigen	smcx	mitochondrial
121	locomo	undifferentiated	malassimilation	tics	hoys	deterioration	cataract	ectodermal	degradation	nologie	nonfunctional	oncogenic	haploinsufficiency	bnabs
122	palsy	correlation	nearsightedness	disturbed	reeducating	arrest	obese	corrigible	gammaglobulinemia	hypoferremia	cd23	euploid	2004-10-01	suppressor
123	inclusion	transference	inefliciency	capacity	neurotic	undersized	imbalance	agenesis	hgbh	supergene	tigens	xenopus	endothelins	colocalized
124	hyperzmia	failure	instinetive	infunt	flatfoot	the	feeblemindedness	cystinosis	repleted	protoporphyrins	macrophages	uniparental	guanylyl	endocytosed
125	foulness	astigma	affeeting	developmental	hypoplasia	educability	microcephaly	undersized	synthase	mutase	cd47	immunotoxins	reprogramming	ubiquitously
126	hyperasthetic	corrigible	fanlt	myopin	function	sexval	neuroticism	cataract	homozygously	nhana	opiomelanocortin	cmt1	enhancer	epigenetically
127	reÃ©stablishment	dependence	fatigue	alcoholism	unerupted	attrition	acuity	hematogenesis	microcephaly	oversensitivity	uncoupling	gene	oligodeoxynucleotides	mitochondria
128	roominess	blushing	disorders	blindness	deformitics	utilization	adults	vaginismus	glycolaldehyde	peptidoglycan	endothelial	haploinsufficiency	aldh2	chemotaxis
129	hyperzemia	myocardial	system	nlone	persoms	infertility	selectees	transvestic	breakage	chalone	internalization	hmga1	nod2	ldlr
130	unilateral	malformations	hereditary	feehle	demineralization	defeetives	unemployable	flatfeet	trichoepitheliomas	membrane	mutationsin	clones	apaf	sdf
131	avoidance	vigion	imbeeility	degencracy	offspring	neuropathic	waywardness	hypovolemia	faulty	collagen	rac2	immunoregulatory	ribosome	mammalian
132	tricial	hemic	elimination	insufficiency	deafmute	anomaly	fusion	feminization	xdp	fetoplacental	doublestranded	tc1	pl10beta	fceri
133	resulling	deprivation	wenkened	abnormality	feeblemindedness	idiotic	physicaily	hypotrophic	abetalipoproteinemia	antigenantibody	cleavage	superfamily	lysosomes	bcl2
134	rhythm	intuitional	perverseness	low	caries	idiots	motivation	obliquities	xyy	granulocyte	pvhl	bcl2	colocalized	dsg3
135	veniences	loss	aboulia	emotional	neglected	brachydactylia	asthenopia	blinding	endocytic	ribosomal	fceri	tcr	pkc	macrophages
136	disabilities	wenkened	monogamy	flatfoot	poverty	plumbing	mental	low	herited	intracellular	breakage	phagocyte	lipotoxic	cep72
137	metritic	thermotaxic	development	infantilism	educable	feeblemindedness	rearing	measu	galactitol	sensorimotor	bpag2	g551d	akt1	parp
138	toxemia	pellagra	cquilibrium	disense	alcoholists	primary	incapacities	factor	euploid	translational	translocated	episomal	phosphatidylinositol	heterodimers
139	incompetence	reactive	physieally	functionnl	eripples	napanoch	healthy	imperfeet	overcompensating	alveolarcapillary	sarcoplasmic	nod2	nrf2	downregulation
140	hypersemic	enfeebles	vitiated	funetioning	microcephaly	overcrowding	proneness	malingering	monosomy	alloantibody	zygote	reprogram	defenses	tolerogenic
141	transition	sedentary	condilions	enuse	canals	dependent	homosexuality	antisocial	argininosuccinase	lymphocytotoxins	virally	supergene	neurodegeneration	transgenic
142	peccant	prenatal	muscular	moral	idiots	hygenic	predisposition	deranges	sideroachrestic	immunoglobins	cd80	reassortment	actin	nonreceptor
143	insalivation	integrity	neuropathic	reeducating	blinded	vocational	dentin	sthenic	phosphoribosyltransferase	intramitochondrial	asialo	daz	ipscs	pik3ca
144	fragile	ideation	dependency	deterioration	corrected	malformation	habitual	intelligibility	nonspherocytic	multipotent	organelle	fadd	cytoskeletal	Î³
145	erosion	development	enfeebles	juvenile	otosclerosis	offsprings	aberrations	ejaculation	fibrinolytically	asialofetuin	subcellular	coreceptors	loeken	tlr4
146	hyperzesthesia	butone	metabolic	acuity	young	capacity	speech	hypogenital	aichr	internalization	repopulating	extrachromosomal	epigenetic	pi3
147	evolve	shiftlessness	exeessive	cnuses	developmental	blindness	miners	crowding	dysgenesia	crossreactive	bacel	oligodeoxynucleotides	coreceptors	msri
148	mouthbreathing	monocular	mnemic	manifest	sthenic	imperception	vocationally	damage	baroceptor	spherocytosis	bu25	neurofibromin	nonsyndromic	pdgfra
149	inertia	mentally	insomnin	frail	grandparents	sterilities	spastic	loss	mutant	opiocortin	transplacental	cloned	hmlhi	bnab
150	odontoblasts	muscular	seerction	infantile	preschool	criminal	orthopedically	homebound	xlinked	radiocopper	proteins	cba	neurofilament	antiapoptotic
151	dystocia	dwarfish	neuropathics	inefliciency	overnourished	sexual	endangered	laterality	feedback	inbalance	checkpoint	ribosomal	amutation	downregulate
152	malassimilation	illnourished	persoms	guardians	partial	perso	behavioral	elderly	trainable	trihexoside	vertebrates	itance	dynein	cxcr4
153	overtaxes	partial	asthenopia	mutism	deciduous	runts	trait	function	damaged	hormonogenesis	pink1	lentiviral	hsp90	sarcomeric
154	vitalizes	enfeeblement	exireme	intelligence	improvable	gene	hypoplastic	cochlear	neurofilament	degradative	neuronal	immunotoxin	cyp450	npm1
155	activities	genetic	negleet	temperament	osteoporotic	deformities	sightless	malformations	rac2	antibrain	endocytosed	microtubules	progerin	retrovirus
156	superinduces	codrdinated	sexual	marringe	dements	aging	arridy	rejection	mating	rac2	asialoglycoprotein	endocytosed	kcnqi	neurotransmitter
157	diarrhceas	neuropathy	overstudy	persons	speech	incomplete	malocclusion	overnourished	mentally	sideroachrestic	xlinked	constitutive	eukaryotic	doublestrand
158	unnat	symmetrical	degencrate	industrinl	disabilities	unsound	flatfeet	neurotic	hormonogenesis	sarcoplasmic	lysosomes	autoreactivity	octopamine	costimulation
159	factus	insuflicient	mechanisms	incomplete	heredosyphilis	visually	defeets	underactive	aberrancies	fragility	mtdna	operon	defensins	posttranscriptional
160	fixedness	organs	paranoiacs	lntter	unstable	hereditarily	sexual	trainable	gastroferrin	antiidiotypic	fetoplacental	mousepox	mdm2	pyruvate
161	neurosal	vulnerable	autotoxis	hypoplastic	dependent	genetic	acrodynia	ciseases	disturbed	fragile	scrapie	degradation	pdgfra	smad
162	embarrassment	illusions	alwnys	loss	unemployable	accessory	dwarfism	children	mutilation	polyanionic	postreceptor	ccr2	overactivation	helicase
163	stomachtube	olfactory	blinduess	varintions	weakminded	tubular	imperfeet	hysterical	ada2	glomer	represses	creb	endoplasmic	gnaq
164	hypercontraction	deranged	innate	obese	dependency	twins	alcoholics	schizoid	hypospadias	dysproteinemic	extrachromosomal	transposons	endoglin	uniparental
165	illnourished	hemogenesis	hematogenesis	wenkened	parental	asthenic	frail	overload	hypoactivity	phosphodiester	eytotoxic	cd23	resultingin	astrocytes
166	conmstitutional	excretive	apprecintion	depressed	idioglossia	mammal	relining	unknown	hemolysis	modulations	doublestrand	sexlinked	fibroblasts	hepatocytes
167	anwemia	desides	respongible	inferior	homeless	erippled	polydactyly	undergrown	hyperglycinemia	release	transcriptionally	ofhuman	mspl	hela
168	emotion	neurosal	compulsive	actunl	primary	neglected	dependent	runts	invariant	immunoprotective	tc1	heterodimers	rxr	endostatin
169	urzmia	chavacteristic	vigion	grenter	permanent	adult	unwanted	prediabetic	arthrodysplasia	helper	complementmediated	srebps	titin	monocytes
170	civenlation	hypochondriasis	distinetively	praceox	premature	mating	bowlegged	psychosexual	aneuploidy	nonhistone	effectors	recombine	retrogene	flt3
171	neurilemma	mechanienl	equilibrinm	influenee	stigma	predisposition	astigmatism	tainting	microphthalmos	dna	thymocytes	ifitm3	asporin	metabotropic
172	wsthetic	factal	digestive	nlso	adenoids	trichromatic	nearsightedness	hypoadrenia	disordering	phosphorylating	virion	upregulated	zap	cd36
173	causin	adductive	insunity	balance	acuity	mutes	ciseases	immaturity	dynein	ratelimiting	mutants	idiotypes	tlr1	smcx
174	toxeemia	disarrange	hysterieal	nervous	psychopathic	contrariness	incorrigibles	hypoplasia	cystathioninuria	isoantibody	immune	trithorax	duchenne	podocytes
175	codrdinating	asymmetry	alcoholists	overerowding	higher	hemolytopoietic	edentulous	masturbation	phosphofructokinase	desialylated	genomic	homeobox	rb1	hdac
176	superficies	microcephalism	aÃ©ration	overerowded	inequality	homosexuality	subluxation	galactosemic	overactive	endogenous	extracorpuscular	atrx	perforin	2004-10-01
177	reÃ©stablishing	kiduneys	iteelf	constitutionnl	overweight	flicker	erippled	cleft	sulfoximine	mutants	cd8	chaperone	shank3	coreceptor
178	putridity	normal	normal	joeal	maternal	deafmute	incompetence	secretional	gene	c5a	desmosome	codominant	aberration	ns5a
179	thermotaxic	mouthbreathing	disturbanee	heeause	disorganized	upposed	loss	nonautistic	undergrown	antidonor	cas9	microdeletions	cxcr4	ribosomal
180	unphilosophical	simplification	hypoplasia	wenkness	hyperactivity	morons	criminalistic	spastic	deficieney	zymosan	alloimmunization	hepatocytes	vasoocclusion	hypermethylation
181	degradation	nearsightedness	semse	physieally	integrity	aberration	deformity	hypogonadism	masked	cellular	mrnas	chromosomal	oxidase	downregulates
182	instability	arities	overcrowding	poverty	dystrophies	degencrates	antisocial	immunopolysaccharides	inborn	clone	microtubule	quasispecies	checkpoint	ctla4
183	vomerine	vitiated	youth	refractive	brachydactylia	truants	neurosis	physicaily	recessive	delayed	melanocortin	autosomal	jirtle	overexpress
184	overcrowding	constipution	abductive	bodily	partially	deaf	childrem	weakminded	pvhl	rdeb	transmissible	protooncogene	metabolically	idhi
185	congenitally	exhaustion	waywardness	speeeh	infertility	epileptic	flicker	cystinuria	cyclothymic	mitogenesis	singlestranded	igf2	hmga1	coexpression
186	exhaustibility	exeiting	ineapacity	intoxication	housing	vegetarians	depressed	automatism	wernicke	agammaglobulinemia	accelerated	brcal	pirating	epigenomic
187	fzecal	attrition	perverts	neurosis	lefthanded	delinquent	accommeodation	senescence	albinism	kupffer	creb	hprt	cgmp	vdr
188	refractive	comeliness	toxemia	eflicieney	blindness	neuromuscular	maldevelopment	chronic	xlmr	phagocytes	fibrillin	internalization	hmsh2	md2
189	retroperitoneal	middens	criminals	enuses	balance	inferior	retinoblastoma	proprioception	anhepatic	breakage	phosphorylates	fhit	reticulum	igfbp7
190	defilement	fanlty	natural	inhibition	springiness	functional	laterality	idioglossia	lymphopenic	alloantigens	unactivated	zap	rnas	dendritic
191	insufliciently	functiomal	swoons	disabilities	defeetives	unbalance	aniseikonic	personalitics	gigantism	glycocalyx	pomc	epigenetically	thermogenesis	phospholipases
192	tinnitus	adolescent	presbyopia	deficient	correction	proneness	trichromatic	ataxias	sarcotubular	antigenspecific	synarchic	cytoplasm	rgs4	secretory
193	apathy	sentiency	indolaceturia	elimination	rejectable	prematurity	equilibrinm	hypophosphatasia	damage	antimyelin	somal	superantigens	cyp1ai	fibrillin
194	thesurgeon	errors	glveosuria	idioey	infected	divorce	gritting	afibrinogenemia	chromatinpositive	desmosomal	eamg	transeribed	mutate	faah
195	vasomotor	reversionary	elaborative	defccts	imperfeet	partially	subconscious	mothers	protocollagen	organelle	chemoreceptor	lifraumeni	hotspot	nod2
196	mechanisms	disorder	degenerates	disturbunce	incompetence	fibrinase	disorganized	hearing	function	polyglutamate	aberrant	maternally	kvlqt1	herg1b
197	overtaxation	olfactories	torsioning	inborn	habitual	hysteriacs	brachydactylia	threatened	fragile	cytotoxie	nonimmunoglobulin	35delg	extrinsic	synthase
198	exudates	overerowding	vestricted	enuresis	nanism	feeble	backwardness	prolonged	dominance	endosome	antibodymediated	eukaryotes	transthyretin	hmgcr
199	bursa	inexplainable	ecauses	rejection	cleft	corrigible	deglutition	preschool	reutilized	cryptorchidism	inherited	cytosol	excitotoxicity	lymphotoxin
200	curvatures	innate	sedentary	underheight	eavironmental	intermarry	flatfoot	unilateral	nonautistic	arylsulfatase	microfilaments	pseudogenes	silenced	ccr2
