# Supplementary material for: Insights from full-text analyses of the Journal of the American Medical Association and the New England Journal of Medicine
Source: eLife. 2022 Jul 7;11:e72602. doi: 10.7554/eLife.72602 (PMC9262397; doi:10.7554/eLife.72602)
Supplement: Supplementary file 8. [file elife-72602-supp8.xlsx]

## Sheet: defective
	1810-1819	1820-1829	1830-1839	1840-1849	1850-1859	1860-1869	1870-1879	1880-1889	1890-1899	1900-1909	1910-1919	1920-1929	1930-1939	1940-1949	1950-1959	1960-1969	1970-1979	1980-1989	1990-1999	2000-2009	2010-2019
1	conditions	ihus	mobility	impairment	visual	impaired	deficiency	defects	impaired	defects	mentally	defects	retardation	unbalance	impaired	impaired	impaired	defect	expression	dysregulated	nlrp3
2	victims	intermediate	sanguification	volition	aberrations	impairment	defect	defect	plumbing	unstable	defects	mentally	defects	regulatory	germ	deficiency	defect	impaired	constitutive	repression	senescence
3	performance	nutrition	manifestations	sanguification	deficiency	defect	defects	overcrowding	defect	defeetive	defect	malnutrition	impaired	maladjusted	accelerated	congenitally	deficiency	pretranslational	alas2	nlrp3	dysregulated
4	development	latent	organism	perverting	impairment	refractive	overcrowding	plumbing	defeetive	defect	feebleminded	defect	disorder	antisocial	aberration	phenotype	tuftsin	activation	gene	smad3	dock2
5	defect	vilal	perception	secretory	aberration	mydriasis	defectivo	excremental	aerial	deficiency	deficiency	impaired	deformities	unstable	erythropoietic	abnormal	abnormal	glucosylation	bcl11b	atg5	mitophagy
6	structures	metastatic	secretory	reproductive	contaminated	anomalies	optical	sybtem	defectivo	impaired	delinquents	adults	congenitally	lackof	masking	hexosephosphate	disorder	tuftsin	phagocyte	stat5b	repression
7	susceptibility	incomplete	aberration	deranges	deterioration	diplopia	aberration	defectivo	overcrowding	congenitally	defectives	delinquents	mentally	impotence	defect	impairment	genetically	postreceptor	mosaic	orai1	aberrant
8	display	enteric	deranges	functional	nutrition	crowding	incomplete	storage	malformation	deterioration	imbeciles	incorrigibility	dentition	hyperactivity	deficiency	accelerated	sialyltransferase	peroxisomes	transactivating	opa1	ikk2
9	dentition	facl	motor	function	defectivo	insufficiency	contamination	defeetive	defects	backwardness	moron	blind	crowding	conditioning	congenitally	metabolically	aberration	aberrant	downregulate	underexpression	gata3
10	volition	wauling	nutrition	deranging	sanguification	disturbances	disturbances	impairment	deterioration	abnormalities	delinquent	vision	malnutrition	germplasm	deficiencies	reutilized	depressed	galactosylation	organelles	upregulated	iÎºbÎ±
11	allied	yvhich	wauling	disturbances	adjustment	defectivo	contaminated	deficiency	deficiency	malnutrition	committable	adenoids	unstable	orthopedically	precursor	aberration	congenitally	gonadotrope	pretranslational	klf1	atg5
12	respiratory	drowning	visual	abnormal	calorification	distortion	conduction	impaired	impairment	retardation	defeetive	retardation	avitaminosis	incorrigibility	locus	fragile	abnormality	humoral	phex	ferroportin	irf8
13	sympathetic	vvhich	arterializing	visual	maintenance	deficiency	persistence	pollutions	bystem	neuropathic	alcoholics	defectives	maladjustment	mishandling	reconversion	transplacental	mutant	acutephase	transactivator	pvhl	ripk3
14	systems	functional	conservative	nisus	systemic	mobility	intervention	uncleanly	inequality	instability	teeth	imbeciles	sexually	aberrations	imbalance	nonphenylketonuric	defectin	methylthioadenosine	wiskottaldrich	proteasomal	cd39
15	discrimination	characteristics	perverting	organism	circulating	nutrition	latent	dements	sybtem	vulnerable	psychopaths	teeth	imbalance	habitual	orthopedically	instability	leukotaxis	phagocyte	glycosylphosphatidylinositol	phex	cd73
16	shock	coagulation	secernents	secernents	impaired	wasting	pernicious	smell	congenitally	refractive	imbecile	defeetive	idiot	thumbsucking	dependence	mutant	isomaltase	autoantibodics	achondroplasia	ikk2	represses
17	distribution	transition	chylification	chylification	deprivation	optical	utilization	conservancy	volition	lackof	idiot	caries	instability	interaction	inherited	disorder	repression	celldependent	metallothionein	tissuespecific	inflammasome
18	mobility	buffy	participate	depurative	sedentary	abductive	periodic	endangered	poor	defectivo	speech	unstable	dependency	aberration	activated	hypochromic	defects	endogenous	ace2	ampk	irx3
19	virus	defect	defect	ofany	innutritious	accessory	instability	farmers	nutritional	enfeeblement	children	instability	affect	avitaminosis	unbalance	erythropoietic	chemotaxis	expression	mutants	dnarepair	bcl11b
20	maintenance	unexpected	volition	manifestations	secretory	susceptibility	masked	bystem	clasb	perception	incorrigibility	psychopaths	adjustment	repressions	developmental	defect	cosynthetase	pituitaryadrenal	activation	myostatin	ubiquitination
21	reality	malignancy	occult	disproportioned	perverting	adjustment	unstable	poor	partners	complexes	feeblemindedness	congenitally	accessory	perception	deficieney	excessive	impairment	deficiencies	adgre2	klotho	irx5
22	products	volition	incomplete	reflex	disturbances	integrity	volition	aud	crowding	bodily	neuropathic	overweight	backwardness	defectivo	conditioning	hemoglobinopathies	abetalipoproteinemia	carboxylase	mutant	c3h	stat5b
23	secretory	sympathise	vocal	dependent	overtasked	deafness	impaired	contaminated	offspring	impairment	epileptic	poor	malocclusion	deterioration	nonprothrombin	macrocytic	hypophosphatemic	impairment	betatrophin	cellcycle	phagocytes
24	insects	reality	aciion	arterializing	products	immobility	deterioration	employees	deafness	mentally	malnutrition	parental	precocious	instability	defects	deficiencies	synthase	abetalipoproteinemia	transducin	vegfb	tmprss6
25	deficiency	feeding	normal	inequality	wasting	asthenopia	labyrinthine	radiation	watersupply	aberration	criminals	feebleminded	disabilities	parental	extracorpuscular	clone	phagocyte	holocarboxylase	telomere	wnt4	intracellular
26	pathologists	menstruous	disproportioned	defect	susceptible	reflex	impairment	drinking	alien	predisposition	retardation	adult	trainable	disorganized	impairment	trait	deficiencies	immunc	transducing	bmpr2	gÎ±q
27	activity	unsafe	refractive	aberration	optics	transient	susceptible	gaols	nutrition	disorder	unclassified	trainable	adolescent	highstrung	dysfunctions	depressed	cystathionase	tlymphocyte	gata3	pcsk1	plcÎ³2
28	data	putrescency	ihus	biliary	defect	myopia	inherited	malnutrition	developmental	perverts	trainable	moron	activated	adventitiously	nutritional	nondisjunction	erythropoietic	sialyltransferase	upregulate	iÎºbÎ±	mlkl
29	vitality	sensitive	habitudes	hypochondriasis	organism	externi	secretory	cesspools	fuuctional	deficiencies	adenoids	children	deficiencies	handicapping	disorder	hemostatic	insensitivity	c3bi	defect	pth1r	ripk1
30	susceptible	attitude	boih	acutcness	hygromÃ©trie	scotoma	defeetive	traps	ceutral	shiftlessness	alcoholism	recidivists	defeetive	sham	erythrostasis	extracorpuscular	accelerated	deficieney	calpain	vasp	glycosylation
31	nutrition	unfavourably	disseminated	calorification	sexual	unilateral	transient	bouses	uuusual	nutritional	adjustment	backwardness	mongolian	congenitally	degradation	megakaryocyte	albinism	glomerulosa	neurofibromin	caveolin	adipogenesis
32	oximuriatic	secernents	invigorates	deterioration	passive	anomaly	dependent	working	obscuro	mechanisms	illiterates	deafness	offspring	retardation	otosclerosis	hemolysis	lysosomal	epimerase	phenotype	polycystin	zeb1
33	economy	extinction	cachectic	hemorrhages	susceptibility	hypereemia	limitation	soil	mutism	amblyopia	commitment	occupations	abnormal	reversions	reality	hyperprolinemia	osteolysis	mevalonate	dysregulated	bcl11b	ferroportin
34	pernicious	shews	distortion	nutrition	cachectic	motor	cachexia	neglected	meutal	overfatigue	backwardness	adolescent	overfatigue	hematosis	qualitative	hydroxyprolinemia	variegate	deficiency	phosphorylate	abca3	e403x
35	chain	perturbating	overtasked	optical	emotions	coloboma	behavior	watersupply	uncleanly	volition	adult	retardates	prematurity	overdevelopment	hemostatic	polar	cystinuria	macrophage	nonfunctional	tfr2	orai1
36	smoking	aclion	inorganic	cerebellum	digestive	ciliary	dependence	drinkingwater	acquired	disabilities	offspring	developmental	senescence	defeetive	hyperaldosteronism	iodoprotein	xlh	fcy	granzymes	pax2	arid5b
37	errors	progressive	phantasms	defectivo	dependence	limitation	manifest	incomplete	disabled	intrinsic	intellectually	healthy	hyperactivity	specch	unstable	spherocyte	galactokinase	reconstitutes	galc	cftr	srebp1
38	collecting	retrograde	annihilating	influenco	bodily	reproductive	mammals	insanitary	disturbances	smell	hearing	disorder	disturbances	homosexuality	disturbances	cystathionase	leukotactic	hereditary	postzygotic	peroxisomal	opa1
39	events	injurions	putrescency	deciduous	affect	deterioration	astigmatism	fouled	acuity	paradoxical	recidivists	shiftlessness	educable	postphlebitic	neurospora	senescence	xii	leukotactic	orai1	adipogenesis	noncanonical
40	dependent	embarrassment	abnormal	disorganizations	crasis	photophobia	wasting	graveyards	inherited	impressionability	parental	feeblemindedness	deciduous	deleteriously	facilitation	anomaly	deficieney	peroxisomal	dimerize	pili	defensins
41	caloric	aciion	secerning	deficiency	vilal	fusion	diabetic	persons	deprivation	sensitive	idiotic	disabilities	inborn	oversensitive	hyperammoniemia	breakage	aberrant	thymusdependent	ink4	ela2	pink1
42	characteristics	mobility	abstractedly	crasis	enfeebling	complex	complex	mutism	optical	structural	borderline	avomen	maladjusted	libido	mammal	exhaustion	sequestration	nonclassical	c3bi	heterodimerization	prosurvival
43	embarrassment	antirritant	formative	sexual	chylification	paraplegia	endemic	bodily	anomalies	slackness	epilepties	truancy	dysfunction	inherited	maladjusted	genetically	sphingolipid	microtubules	stat5b	il10r2	secretory
44	capillaries	primee	acutcness	vitality	intervention	paresis	transmission	reproductive	poverty	psychomotor	blind	deterioration	aging	adverse	abnormality	mutation	formiminotransferase	chromogranins	huntingtin	cd39	osteoclasts
45	canals	taciturnity	exhalent	vilal	occult	localization	occupations	habitual	disorder	impressibility	adolescent	offspring	aberrations	psychogenie	deficient	aplasia	pretranslational	hydrase	rfx6	haploinsufficiency	rab5
46	abuse	inhalation	characterise	occult	bland	symmetrical	amaurosis	iufected	activities	subwaking	psychotic	committable	malformations	disfigurement	inborn	intracorpuscular	endogenous	homing	emerin	pink1	cd55
47	imagination	theleast	phlogosis	occlusion	complex	peripheral	circulating	monocular	iudeed	precocious	lisping	fathers	incapacities	incapacities	receptor	homocystinuria	engulfment	nonpermissive	cbfa1	represses	gtpases
48	primitive	gene	aberrations	passive	avoidance	progression	paralyses	schoolhouses	conditiou	eliminative	developmental	illiterates	anomalies	malformed	fatsoluble	dicentrics	trihexosidase	abnormal	cellspecific	rab5	autophagosome
49	failure	integrity	secrelion	auditory	deficiencies	cachectic	anomalies	apathy	esseutial	nutrition	antisocial	congenital	adaptation	uncorrectable	parasitization	aciduria	argininosuccinic	polyol	pparg2	stat5a	gÎ±11
50	movement	impulse	enervated	habitudes	functional	deception	rickets	excessive	humau	asthenopia	hereditary	underfed	parental	suboxidation	spherocyte	imino	kynureninase	phytohaemagglutinin	nonpermissive	tmprss6	drp1
51	birds	passive	metastasis	marvellousness	hypereemia	rottenness	hypereemia	manures	causea	myopia	criminal	nutritional	feeblemindedness	overexcitation	matrix	aberrations	homocystinuria	complementmediated	ripk3	tnfr1	myostatin
52	offspring	rage	sympathise	ocular	aerial	incomplete	neurotic	perception	neural	neglected	mutes	nutrition	criminals	unloved	retardation	defects	glycosylation	hyperproinsulinemia	sh2d1a	neurod1	phex
53	amaurosis	temperance	nisus	progression	prejudicially	strain	abductive	vitiated	neurons	poverty	mental	susceptible	pulpless	degradation	osteogenesis	infected	derepression	inhibition	tissuespecific	ubiquitylation	mitofusin
54	glandular	musthave	complex	integrity	invigorates	neurosis	inhibition	defilement	insano	stigma	stutterers	bodily	impairment	predisposition	factor	parasitization	hgprt	zymogens	glycosyltransferase	p27kip1	hemojuvelin
55	complex	vibration	debilitates	annihilates	emotion	perception	sybtem	milkmen	unstable	overcrowding	imagery	habits	psychologic	suicide	prothrombinogen	unrelated	humoral	atpasc	mitogenesis	inflammasome	upregulated
56	dislocations	losl	patural	defects	contamination	defects	paraplegia	neuropathic	couditiou	inequality	dementia	balance	deafness	dominance	defeet	prolinuria	mutation	osmoreceptor	cyp11b2	s6k1	vps45
57	stress	metastasic	exhalants	opposito	ganglia	dependent	topography	pollutes	inhibition	wasting	persons	precocious	eugenic	afibrinogenemia	germplasm	disparity	acidemia	leukotaxis	multidrugresistance	breakage	trÎ±
58	intermediate	progression	disturbances	exhalants	metastasis	localized	nutrition	sewers	iusanity	funectional	correction	preschool	abnormality	overfatigue	parahemophilia	reutilization	ornithine	exocytotic	cd59	irf8	lymphopoietin
59	race	oximuriatic	oigan	lesser	vibration	defeetive	deprivation	unstable	impressionability	developmental	juvenile	parents	committable	decidua	reutilized	degradation	candidacidal	glycosyltransferase	reassociate	phd2	eukaryotic
60	identity	exisls	sensitive	produco	rottenness	abducens	thcso	iufectiou	hypermÃ©tropes	hematosis	inferior	delinquent	poverty	hydrocephaly	inappropriate	photohemolysis	hyperaminoaciduria	accelerated	genctically	knockout	osteoblasts
61	infantum	complex	arvest	alveoli	deranges	conduction	reproductive	unknown	illusions	lisping	mindedness	athletes	deficiency	articulatory	depressed	congenital	congenital	chondrogenesis	perturbs	mitophagy	heterodimerization
62	negative	4thly	sexual	conservative	depraved	interni	keratitis	residential	persistence	automatism	child	inferior	maladjustments	hypoactivity	instability	mating	bonding	defects	sarcoglycan	nhe3	betatrophin
63	perception	stupefies	endosmose	stomachal	endangered	confusion	esseutial	leadpoisoning	acuteuess	metabolic	hypoplasia	dominant	nutritional	stigma	cozymase	sideroblastic	xlinked	insulinmediated	adhalin	cathelicidin	autophagosomal
64	capillary	participate	oppressing	depraved	volition	maintenance	secretions	abnormalities	specialization	rickets	rehabilitation	pulpless	instinct	apraxic	blind	cleavage	inborn	endocytosis	betachain	pgc	p2x7
65	uncertainty	intervention	uatural	arvest	sthenic	emotional	acoustic	unprovided	mobt	fatigue	inherited	hereditary	abnormalities	defeet	perceptual	trisomic	mucopolysaccharidoses	immunoregulatory	wti	hypomorphic	cohesin
66	lesions	debilitates	antirritant	wauling	depurative	isolation	offspring	mechauical	super	anomalies	poor	deformities	delinquents	dysfluencies	cleavage	iminoglycinuria	reutilization	lymphocytolysis	cholangiocytes	mitofusin	proteasomal
67	tests	indolent	chylopoietic	2dly	decarbonizing	impressibility	vasomotor	largor	backwardness	neurosis	disorder	vocational	shiftlessness	prÃ©existent	offspring	g6pddeficient	coproporphyria	crassa	morphogenic	waf1	cellcycle
68	supporting	anomaly	prostrates	genital	dependent	innate	malaria	reality	dual	exhaustibility	underfed	victims	mutism	impulsive	cystinosis	polyploidy	thrombasthenic	blymphocyte	retrovirally	mutants	adipogenic
69	electrical	sympathises	cerumen	overtasked	disproportioned	presbyopia	poverty	hearing	alexia	masturbation	neurotic	criminals	regulatory	otosclerotic	endogenous	mosaic	precocious	neurophysin	gfi1btr	nrg1	th1
70	incomplete	cacoethes	pliancy	rottenness	capablo	volition	intracranial	obscuro	preventible	dilapidation	recidivist	impairments	malformed	imbalance	thromboplastinogen	galactokinase	parasitization	deficicncy	cd39	netrin	wnt1
71	chyle	deterioration	defectivo	complex	unexplained	latent	diplopia	visual	bodily	hallucinations	nasal	corrected	caries	infestations	calcifying	translocation	pigmentosum	monooxygenase	polyclonally	offunction	underexpression
72	passive	tloes	conversion	transmission	defects	strabismus	mutilation	aloue	iufectiou	vagabondage	incorrigibles	juvenile	delinquent	recessive	isosensitization	albinism	hypertyrosinemia	boneresorbing	rfx	rfx6	necroptosis
73	recurrent	defects	idiotcy	perturbating	maternal	ocular	impulsive	couditious	pulmouary	impulsive	primary	vitality	defectiveness	disfunction	concentrative	genetic	inherited	subsct	endopeptidases	npt2c	calreticulin
74	hepatic	galen	metastasic	motor	avcll	masked	anomalous	conformity	neglected	dements	alcoholic	correction	somatic	enamel	azotorrhea	aniridia	abnormalities	dj3	p15ink4b	lrp5	phds
75	net	metastasis	acescent	susceptible	optical	susceptible	flushing	showu	agraphia	ideational	congenitally	imbecile	aberration	nongravid	sympathicoadrenal	lysosomal	hereditary	familial	ldlreceptor	ubiquitination	erÎ±
76	processes	hemorrhoids	influenco	impressibility	latent	binocular	obscuro	daugerous	occupations	neurotic	defectiveness	sedentary	dual	xerophthalmia	hematopoietically	hemes	lysinuria	zona	interleukin4	cdkn1b	perturbs
77	fibrin	density	unfrequcntly	dermoid	obesity	digestive	thelocal	substauces	amaurosis	intellectual	reformatories	attitudes	readjustments	seclusiveness	thromboplastic	abetalipoproteinemia	ferrochelatase	mannosebinding	rad51	terc	ubiquitylation
78	sedative	visceral	articulation	aclion	acutcness	acutcness	habitual	dependent	skeletal	verbal	corrected	maladjusted	arrest	trainable	apperception	abnormality	spur	lysosomal	immunosurveillance	nod2	degradation
79	visceral	unconscious	latent	affect	secretions	labyrinth	transition	coutrol	endangered	astigmatism	paralytics	neurotic	neural	fragile	predisposition	bind	amish	camnitine	hrf20	drial	cathelicidin
80	effusions	discipline	marvellousness	development	molecular	spastic	refractory	paranoiacs	impressibility	elue	educable	defectiveness	super	inborn	cytotoxic	imbalance	hyperestrogenism	abnormalities	photoreceptor	trÎ±	hyperactivation
81	reaction	vitality	cords	aerial	structural	habitual	avoidance	hypermÃ©tropes	largor	neural	morons	adjustment	correction	hypoplasia	hypercalcinuria	precursor	lodination	insulinstimulated	phospholamban	ldlreceptor	cdkn1b
82	hemorrhoids	disgust	embarrassment	endosmose	hallucinations	zone	neurosis	functional	couditious	acuity	education	stuttering	handicapping	impaired	subnutrition	damage	heterozygotic	subscts	ryanodine	proangiogenic	brd4
83	diabetes	abrasion	deposite	pecu	elimination	replacement	disorder	preseuce	primitive	hysterical	retardates	sexually	antisocial	disintegrative	schizoid	polyspermy	sialylation	circulating	nonallelic	gata3	s6k1
84	adherence	stimulation	disorganizations	enfeebling	idiot	deadness	systems	avoidance	dependent	autosuggestion	permanent	homeless	functional	nonorganic	apraxia	and	neutropenia	phagolysosome	c3h	orthologue	osteocytes
85	fatality	rejection	calorification	deadening	aids	overcrowding	inequality	faulty	dements	incapacities	functional	rehabilitation	inequality	impressionability	components	overgrowth	hydrase	methylase	tmprss6	ikaros	mct1
86	control	anolher	isolation	instinct	arterializing	secretory	sensory	sewered	hearing	physicial	rejection	maladjustment	apathy	misconception	ovum	homocystinuric	aminoacidurias	osmoregulation	pmp22	beta1	mre11
87	deformity	insufficiency	susceptibility	innate	auditory	relaxation	lactation	aerial	inharmonious	parent	vagrancy	mental	healthy	untidiness	thrombasthenia	offspring	polyglutamyl	nonphagocytic	defensin	bmpr1a	ehhadh
88	cotyledon	secretory	heuce	null	reproductive	intraocular	emotional	fumigation	thebe	taints	truancy	prisoners	malocclusions	reality	transformation	cystathioninuria	thymusdependent	elliptocytosis	celldependent	col4a3	adgre2
89	fatigue	tests	rnay	itsel	influenco	monocular	avliich	insalubrity	insaue	adaptation	deficiencies	deficiency	attitudes	howcever	intrinsic	disorganized	dermatosparaxis	hydroxypyridinium	tumorsuppressor	vegfa	peroxisomal
90	design	somnambulism	chymification	idiotcy	vitality	damage	presbyopia	soakage	lethargy	overtaxing	impaired	degenerates	deterioration	stuttering	manifest	endoreduplication	deoxyadenosylcobalamin	deficiencics	scn4a	sfrp4	pore
91	premature	boih	deranging	disordering	discipline	tension	apathy	reservoirs	gaols	incomplete	syphilis	prostitution	orthopedically	disinhibited	antihemorrhagic	acquired	acquired	polyclonally	frataxin	prosurvival	nkcc2
92	absence	recommences	consolidation	heneo	stimulation	intervention	inappropriate	bucii	morale	intelligence	occupations	epileptic	unbalance	hysterias	destabilized	masked	deconjugation	defectin	transactivation	phospholamban	polycystin
93	limited	nodes	fixedness	decarbonizing	masturbation	unsafe	impotence	conditiou	consequeuce	alcoholics	housing	overfatigue	hypervitaminosis	overactive	anoxemic	dysplastic	metabolically	phex	multifunctional	galc	glycosylphosphatidylinositol
94	agent	endosmose	prurient	damage	parental	vitality	dominant	imperfect	abnormalities	autotoxemia	tuberculous	stutterers	reactive	bodily	pyridoxin	hyperferremia	carboxylase	xla	creb	npt2a	cxcl12
95	sexual	aberrations	melioration	boih	replacement	intorni	foci	deficiencies	functional	asymmetry	mutism	infected	dwarfism	corti	emotion	poor	palp	derepression	perturb	noncanonical	pth1r
96	secretions	parturient	aids	anomalies	insalubrity	anomalous	bystem	disorder	circumstauces	apathy	parents	disabled	overdevelopment	malocclusions	deciduous	susceptible	aciduria	receptor	ink4a	irgm	frizzled
97	canine	prostrates	irremediably	hyperamia	decline	bodily	amblyopia	disturbances	enfeeblement	imbalance	care	mothers	hereditary	malformations	affect	dysfunction	galactosemic	mutant	autophosphorylation	cryab	perilipin
98	anatomists	handling	pathologic	structures	snoring	toothache	chorda	tbe	juvenile	extrinsic	instability	structural	eriminal	craniostenosis	precocious	sedimentable	instability	galactosylhydroxylysyl	nongenomic	ripk1	smad7
99	community	impulso	chyle	tloes	promoto	rellex	acquired	iusanity	disproportion	dominant	sex	chronic	permanent	proneness	conversion	glycinuria	apoenzyme	surfacemembrane	enpp1	ripk3	sfrp2
100	virulence	phrenzy	bloodlessness	secretions	ihus	bilateral	reservoirs	causea	inclusion	eyestrain	congenital	abnormal	retardates	endogenous	dominance	malformation	thrombasthenia	glycoconjugate	gdpd	syndecan	stat5a
101	deafness	hypochondriasis	emotion	heuce	hemorrhagic	rachidian	isolation	habitations	disabilities	hereditary	chronic	blindness	illiterates	debilities	metabolically	telangiectasia	fgf19	highaffinity	d178n	ipex	subunits
102	idiopathic	confusion	depurative	phantasms	heneo	unexplained	excremental	evitable	extinction	integrity	nutrition	organic	depraved	shiftlessness	conserves	spherocytic	postreceptor	450c21	deactivating	lymphopoietin	organelles
103	progressive	ike	constructiveness	idiotism	transition	lesser	paresis	sauitary	excremental	adolescent	vocal	predisposition	enfeeblement	overstretching	hypoactivity	phagocyte	bactericidal	ca2	cypb	srebp1	muc5ac
104	positive	promoto	accessory	ceteris	annihilating	olfactory	anomaly	conditions	aberration	hysteroid	senile	educable	wageearning	starvation	ideation	afibrinogenemic	sucrase	sialylation	transgenes	telo	deacetylases
105	digestive	detection	perturbating	putrescence	marvellousness	participation	heuce	susceptible	subcortical	underfed	syphilitics	stammerers	harmfully	blindness	dependency	deficieney	xeroderma	thyrotrope	hspb1	dock2	mtorc1
106	instinct	influenco	produco	corpora	ihose	choroiditis	organism	blind	shiftlessness	malformation	delusional	refractive	stigma	adolescent	pituitaryadrenal	carnosinase	phagolysosome	cosynthetase	hypomorphic	tnfaip3	npt2c
107	preventive	fatality	vilal	fixedness	deafness	panic	hunger	esseutial	sauitary	juvenile	erippled	psychotic	osteomalacia	superego	dentition	predisposition	diohc	immunodcficiency	mutate	vasculogenesis	proangiogenic
108	shells	uncertainty	enfeebling	secernent	semen	overtasked	innutritious	privies	subconscious	highstrung	drunkards	malingering	predisposition	affective	barrier	glyceric	spherocyte	dysgammaglobulinemia	antigenpresenting	irx5	nfat
109	scale	tissues	medicatriz	participation	null	aberration	malassimilation	malassimilation	toxemia	incorrigibility	paupers	syphilitics	negativism	homosexual	gonadotrophic	inborn	protocollagen	nonhistone	fucosyltransferase	transactivating	cav1
110	resolution	difficalt	evolve	prejudicially	intellection	dementia	malignancy	bloodsupply	sadism	nearsightedness	super	and	inherited	microcephaly	embryonic	spherocytosis	genctically	glycosylation	pax2	gainof	wnt4
111	circulating	hoof	unfelt	secerning	perturbating	toxic	susceptibility	gaiued	psychopathic	sedentary	disabilities	enuresis	hypoplasia	azoospermia	impulsive	thrombasthenia	hypercatabolism	cb5a	derepression	stim1	il10r2
112	style	manifestations	insalivation	malformations	secernent	enfeebling	remoto	caube	externi	weakminded	neglected	intelligence	disorders	maladaptations	defectin	hereditary	wiskottaldrich	genctically	piezo2	cd55	tnfr1
113	electric	gapings	intractable	hallucination	genital	hypersesthesia	emotions	obtaiu	attitudes	syndromes	epilepsy	mechanics	endogenous	refractive	hyperoxia	epiphyses	lipoamide	acyltransferase	mtap	emilin1	podocin
114	precision	rigidity	philoprogenitiveness	torpidity	persistence	trigeminal	accidental	direct	lebs	radiation	prisoners	rearing	adult	vitality	methemoglobinemia	cytoplasmic	hyperferremia	lymphoblastogenesis	protooncogenes	myocilin	vegfa
115	chief	prejudicially	tloes	colostrum	commotions	affect	molecular	acuteuess	instability	instinct	class	dements	annulment	misrouting	cocarboxylase	carnosinemia	deficient	deficien	glycosylations	defensins	cdk2
116	administration	bloodlessness	fattens	fecundating	habitudes	attributes	vitiation	workrooms	developmeut	illusions	deformities	recidivist	parents	disproportions	chromosomal	populations	lithocholate	electrontransport	underexpression	sfrp2	colocalizes
117	flies	lions	auditory	transient	deranging	function	damage	waut	womeu	irritable	shiftlessness	improvable	homosexuality	untruthfulness	kdependent	hyperplastic	thrombopathy	cancerassociated	cd46	beta3	cdk5
118	visitors	aberration	annihilates	intellection	saurian	parent	reality	structural	tetauy	obscuro	immigrants	housing	overprotection	backwardness	mutation	erythrostasis	catabolizing	proopiomelanocortin	cystogenesis	homodimerization	tslp
119	prejudice	sexual	4thly	deprivation	precocious	disproportioned	confusion	perverts	predisposition	rhachitis	stigma	nonhandicapped	dysfunctions	cochlear	achrestic	engulfment	hyperammonemia	ldlreceptor	ebpa	wnt1	ampk
120	modified	hypercatharsis	functional	tempÃ©rament	reality	organism	promoto	underfed	acoustic	esseutial	inferiors	dependency	ioav	psychopathies	inertia	chromosomal	erythroblasts	subresponsiveness	overproduced	pdgfr	endoplasmic
121	relations	aids	quile	amblyopia	putrefaction	cachexia	intrinsic	adverse	causeb	emotional	intelligence	avhose	behavior	firstborn	prehormone	mutants	masking	rhizomelic	immortalization	parp1	galc
122	werner	pernicious	structural	aberrations	perception	adaptation	localization	counterfeited	dependence	hallucination	moral	inferiors	overdeveloped	deafmutism	satiety	centromere	hypertriglyceridemia	hyperestrogenism	heterodimerization	pendrin	defensin
123	horses	tiiat	sapid	progressive	prostrates	sthenic	deciduous	dangerof	instancing	inhibition	visual	neurasthenia	breakdowns	labyrinthine	acrosomal	microvascular	iodinating	oncogen	derepressed	dysregulation	phosphorylating
124	injuries	birds	atrophy	morbid	disorders	sensitive	hydraemic	iuflueuce	utilization	transient	stuttering	persons	thumbsucking	dysfunctions	neutralizers	isochromatid	heterocellular	microfilament	protooncogene	misfolded	atg7
125	galen	display	integrity	hypereemia	fixedness	gait	auditory	kuowu	uew	prÃ©existent	adults	derelicts	restrictive	threatened	deranged	polyribosomes	leschnyhan	antibodydependent	gucy2c	zeb1	kiss1r
126	fear	ulcerative	promoto	hyperemia	activity	obesity	maintenance	outfall	habitual	irremediably	vision	postural	deafmutism	enfeeblement	nephrons	familial	hyperalimented	fumarylacetoacetate	stim1	p2x7	ccl21
127	latent	idiotcy	narcosis	enervate	declension	concussion	glycosuria	throughwhich	crowded	disorders	orthopedically	maintenance	stuttering	crowding	scurvy	contact	microbe	carboxylation	progerin	neurofibromin	glut1
128	buf	secrelion	pigmentum	perception	inertia	functional	combat	maintenance	anomalous	delusional	paranoiacs	overdeveloped	congenital	phobia	masked	triosephosphate	hyperfunction	thyrocytes	mannosebinding	vangl1	fxr
129	fermentation	sus	transformation	inconsequence	vitiation	contamination	economy	vitiation	abductive	phrenasthenia	blinded	perverts	faulty	nonmyasthenic	casei	protoporphyria	sulfatase	mistargeting	arid5b	hnf	med12
130	crowded	disputes	indecorous	embryo	disabilities	avoidance	intoxication	the	dilapidation	anomalous	incorrigible	negro	dependent	accessory	dwarfism	zygote	oxoprolinuria	palmityl	smad3	cxcr1	pvhl
131	occupations	unexplained	deterioration	existences	anomalies	uncertainty	phase	unhygienic	uervous	affective	fair	accessory	dominant	committable	incoagulability	interconversion	thermolability	prtase	transduces	proapoptotic	beta3
132	solitary	canine	instinct	meninges	vicissitude	calorification	failure	oyes	residential	dentition	insano	orthopedically	poor	disfavored	adrenochrome	southdown	ksr	nonenzymatically	aminolevulinate	rxr	constitutive
133	anomalous	wasting	cavernous	blindness	recognition	intolerance	traps	poorhouses	traps	overmastering	disorders	weaklings	xerophthalmia	elicitable	insensitivity	abnormalities	sexlinked	rosctte	receptormediated	mutant	phospholamban
134	septic	poverty	viscidity	dopend	defeetive	reality	hygromÃ©trie	bathing	poorhouses	unsoundness	vocational	environmental	disharmonies	overstress	cyclopia	hepatocytes	polyribosomes	cuitured	zeb1	neurog3	ccl19
135	conformity	thi3	enfeeble	enfeebles	abductive	tinnitus	iusanity	dependence	humoral	flatfoot	idiopathic	impairment	developmental	overstimulated	macrocytic	hypophosphatemia	citrullinemia	pseudohypoparathyroidism	autoinhibitory	downregulate	iÎºb
136	disorganized	ephemeral	crasis	incomplete	modified	retraction	avcll	instancing	apathy	vasomotors	disease	underweight	neurotic	integumental	aberrations	macrophage	methylmalonate	cells2	ikk2	secretory	downregulated
137	continent	mortis	decarbonizing	cachectic	anzmic	tympani	participation	impressible	conduction	parental	minded	incorrigibles	nonhandicapped	laxities	interaction	prolonged	carnosinase	plasmalogen	postreceptor	tsc1	retrovirus
138	prognosis	haiiy	ellects	abnormity	flu	sensory	heneo	thebo	unclassified	unsafe	state	excessive	defectivo	criminalistic	hypoalbuminemia	germ	underproduction	regulation	pc2	col5a1	dap12
139	galvanic	efficiency	mortifications	avcll	recurrent	follicular	tracts	frequeut	filthiness	distortion	illegitimates	the	function	hypogenitalism	porcine	hydroxypyruvate	iminoglycinuria	myoadenylate	proopiomelanocortin	col4a4	netrin
140	lettuce	onset	branchiae	antirritant	extinction	momentary	scantiness	lithaemic	bhock	visual	overweight	inherited	alien	recognizably	disorganized	phagosomes	acrosomal	lymphocytotropic	trim28	glycosylphosphatidylinositol	htert
141	balance	respiratory	intervertebral	enervated	momentary	opposito	seminal	habits	deficiencies	emotions	dependency	handicapped	overactive	neuronal	agenesis	trioctanoin	factor	translocase	vpu	abca1	downregulation
142	predisposition	apathic	pancreatic	dependence	deadening	passive	somnambulism	backwardness	hecoming	dangerof	educative	obesity	demineralization	impoverishment	apoenzymes	hyperbilirubinemic	6phosphatase	pilus	coregulator	endosomes	klf1
143	tissues	controlled	hyperamia	sympathetic	assimilative	lactation	avcre	eutirely	caube	coordinations	breathing	addiets	fanconi	malabsorption	antithromboplastin	polydisperse	oncogene	osmoregulatory	tnfrsf11b	perlecan	card9
144	facilities	ellects	paradoxical	abstractedly	impressibility	area	intorni	fiats	nervoub	hypernutrition	ungraded	nearsighted	psychotic	overdeveloped	convertin	methylmalonate	hyperabsorption	pathway	q295x	hspb1	klotho
145	lamina	drug	transition	rachidian	instinct	molecular	acutcness	nutrition	incomplete	preponderating	feeble	borderline	hearing	disturbances	auditory	genctically	senescence	antigenpresenting	enhancer	endoglin	nbs1
146	putrefaction	craving	olthe	invigorates	nisus	herpetic	indigenous	drainago	straiu	super	minors	incapacities	extrinsic	educable	unreplaced	thrombasthenic	kdependent	membranebound	connexin43	calciumsensing	mmp9
147	subcutaneous	repetition	rottenness	digestive	evolution	vertebrates	detection	incombustible	daugerous	overstrain	aliens	temperament	slackness	oedipal	antipellagric	afibrinogenemia	genetic	ureagenesis	fgfr3	ace2	reticulum
148	safe	commotions	acridity	oigan	formative	genital	adjustment	deafness	pesthouse	anomaly	mentality	latent	enamel	unsafe	antithrombic	transitional	thrombopathia	lipoamide	superantigen	htert	tlr8
149	radical	capillaries	illusions	chymification	signal	sybtem	parasite	ordiuary	ofsuch	reversal	impairments	insanity	incorrigibility	endings	disfunction	deconjugation	dihydropteridine	leukotricne	endosomal	ccr3	lysosomal
150	gain	sthenic	taciturnity	visible	impotence	somnolence	ague	surveillance	systems	perverting	handicapped	pyorrhoea	pyknic	subtlest	intellectual	vacuoles	mosaic	tcell	heatshock	atrx	enpp1
151	arrest	displacement	wakefulness	prostrates	habitual	mutilation	bioplasm	andtherefore	enfeebling	tics	dements	habitual	homeostasis	shortsightedness	institutionalized	sensorineural	mucopolysaccharidosis	transport	cyp11b1	card9	multifunctional
152	perforations	courage	passive	senso	effusions	pernicious	rejection	unsanitary	binocular	committable	deterioration	disturbances	broughtabout	infertility	functional	hypocupremia	homocytotropic	galactosemic	p2x7	heteromeric	corepressor
153	instructions	lactation	ofany	mobility	frail	structural	bodily	natural	waut	reproductive	neurosyphilis	moral	thyrotoxicosis	staleness	hyperactivity	nongrowing	hyperbeta	downregulation	col5a1	abcg1	1alpha
154	probability	grief	shewing	disfigurement	idiotism	hemicrania	formative	dynamos	couditions	surveillance	incapacities	luetics	dilapidation	cephalopelvic	hypoinsulinism	overload	adenohypophyseal	chemotaxins	prohormones	metalloproteases	nrg1
155	essential	patural	aptitude	immediale	ozonic	shared	primitive	filthiness	vasomotor	shortsightedness	abnormal	child	regulation	otolith	ammoniagenesis	glyoxalate	autooxidation	transducin	constitutively	cav1	cryab
156	resistance	irritant	ivill	semen	vivifying	weakness	generalization	clasb	helplessness	skeletal	only	alcoholism	hyperfunction	exhaustibility	nongrowing	aerobic	deficicncy	dolichol	fkhr	10sccr	hdac2
157	intellectual	oppressing	density	glandular	blindness	wit	predisposition	ampio	housing	temperament	predisposition	wageearning	depressed	sexually	deleteriously	genome	lymphopenia	srebp1	p69	pparg2	ikk
158	lesser	emotion	idiotism	unconsciousness	avcre	clitoris	morphological	crowding	leadpoisoning	fuuctions	rating	guidance	retarded	typeof	senescence	autosplenectomy	hypophosphatemia	sialoglycoprotein	chemoattraction	frizzled	suppressor
159	anastomosis	contrast	momentary	contamination	variable	oculomotorius	starvation	draughty	tinnitus	hypotonia	dental	senile	puberty	transference	antivitamins	lymphopenia	insulinmediated	agammaglobulinemia	msr1	upregulation	fcÎµri
160	term	perception	septic	isolation	phenomenon	poverty	functional	outfalls	optimism	hemianaesthesia	vocationally	ioav	conditioning	undeterminable	malocclusion	microvilli	familial	myoblasts	genetically	sorting	downregulate
161	herpetic	consciousness	aclion	primitively	tension	remoto	inertia	mammals	theae	diabetics	reeducation	vagrancy	malabsorption	overripe	determiner	presbycusis	hexosephosphate	phagocytes	herv	downregulated	parp1
162	turkey	endangered	inquietude	obscuro	wauling	intellection	neglected	unsalable	questious	deafmutism	mongolian	neglected	excessive	neurulation	gastrectomized	leukemic	scid	cellwall	fucosylated	betatrophin	autophagosomes
163	distortion	sphincter	spastic	metastasis	confusion	visual	chlorosis	additiou	malnutrition	indolent	mating	reality	exhaustion	panic	hypokaliemia	regenerative	thrombosthenin	hyperphagia	crystallin	smad7	hepatocytes
164	filtration	susceptibility	attendedwith	recommences	progression	aberrations	binocular	couditiou	auatomical	sucklings	pyorrhoea	mating	integration	hereditable	oversensitive	spermatozoa	degradation	synthe	450c21	gtpases	perlecan
165	religious	oceasioned	vivifying	aggregation	voluptuous	papilla	obsolete	emotion	fuuctions	hypnotic	coordinations	abnormalities	guardians	loneliness	accelerin	iodinating	immunocytes	21hydroxylase	pathway	autophagosome	p27kip1
166	attributes	imagination	offood	derange	fusion	neurasthenia	values	anasmia	thoae	presbyopia	depressed	affect	impoverishment	deciduous	substance	tyrosinosis	crossreacting	tetrahymena	dnarepair	glycosylation	phagolysosome
167	rash	antecedently	metaphysical	primary	impulsive	intolerant	disseminated	inharmonious	liviug	emotion	teachers	malefactors	babying	diplegic	seecific	teratogenesis	dysfunction	hyperaminoacidemia	rs1421085	nfat	abca1
168	salivary	poinl	stupefies	chylopoietic	rachidian	motory	sequelae	highstrung	stable	hypermÃ©tropes	hallucinations	affective	hybrid	deficieney	prothrombinopenia	utilization	transhydrogenase	hypoaldosteronism	sclectively	p14arf	pcsk1
169	signal	characterises	impressibility	insen	illusions	curvatures	preventible	participation	depressive	sightedness	maintenance	epilepties	highstrung	contraception	restrictive	locus	hydroxylating	endocytotic	proteincoupled	dectin	dstyk
170	transmission	activity	coagulation	structural	midwives	hygromÃ©trie	testing	transient	dentition	mechauical	suckling	shyness	vulnerable	contralaterally	elimination	transfer	benzopyrene	perturbs	transfecting	irx3	ccl4
171	metal	intractable	husbanding	contaminated	orgaiib	progressive	lamellar	larders	extrinsic	unfitness	vagrants	poverty	denial	intermingle	retarded	bilirubinglobin	tcells	superantigen	lysosomal	c57bl	irgm
172	risk	respires	optics	latent	withdrawal	shallowness	handling	digestive	drought	manifest	murmurs	defeets	groupof	mesomorphs	aplasia	thrombocytosis	nonthalassemic	sodiumlithium	cd73	bmpr	rac1
173	reduction	shaken	medulla	bloodlessness	bioplasm	heuce	null	tainting	permaneut	vestibular	almshouses	deprivation	manifest	associational	acidbase	favism	nonphagocytic	cystathionase	costimulator	hemojuvelin	enterocytes
174	opacity	exfoliation	peccant	unfrequcntly	heuce	lamellar	radiation	confusion	incommensurate	labyrinths	specch	psychoses	bodily	incompetence	cochlear	somatic	defenses	preadipocytes	mct1	ehhadh	cÎ±
175	foetus	crisis	parental	disorganizing	interstitial	masturbation	communicable	staleness	mutilation	weaklings	postural	psychically	avomen	assaultiveness	decompensating	hyperphagia	apoenzymes	betachain	homodimers	mecp2	cxcr1
176	thinking	allopathists	ponderable	vocal	stupefies	stimulation	intolerance	circumstauces	andtherefore	oneirism	alveolitis	unrelated	innate	anxiousness	methylmalonate	masking	osteogenesis	immunoresponsiveness	transcriptionally	card15	domaincontaining
177	evil	parent	optic	impaired	sport	innutritious	imagination	obtuseness	somatic	unexplained	unstable	morons	truancy	sympathicoadrenal	otosclerotic	redcell	sccretory	lysosomes	glycosyltransferases	colocalizes	raf1
178	disorders	acescent	vibration	primee	innate	sanguification	systemic	sex	wageearning	ephemeral	workhouses	capacity	funda	ego	sucking	invertase	hartnup	feline	ferroportin	1alpha	caveolin
179	endosmose	opposito	intellection	perspiratory	reservoirs	hearing	causeb	nitrification	maintenance	imagination	refractive	reformatories	blind	setpoint	proteincalorie	intestinal	pterin	mucopolysaccharidoses	cosegregates	chondrial	smad3
180	extensively	lesions	innate	phlegmasiae	vital	cilia	unexplained	degradation	teud	hysterias	defectivo	partially	laxities	interferences	athyreosis	adult	tcell	hormoneinduced	cd3d	resistin	deregulated
181	energy	insufferably	seein	cachexia	irremediably	distribution	affect	consequeuce	drainago	aggressive	recessive	visual	disfunction	excessive	formiminoglutamate	isosensitization	synthetase	xlinked	fceri	ikbkb	atrx
182	inequality	conversion	depraved	annihilating	components	deciduous	populations	paralytics	living	straiu	cacogenic	employees	malingering	preeclampsia	damage	glucosephosphate	methylase	epsteinbarr	recombinational	chemotaxis	endosome
183	excision	resolvents	obtund	abductive	produco	extinction	crowding	peoplo	heuce	components	homeless	permanent	mechanics	helplessness	hypoplastic	deficit	glucoamylase	extrathymic	haploinsufficiency	drp1	gata2
184	outlet	uatural	conjoin	primitive	gills	aptitude	ozonic	emotional	showu	adenoids	perverts	arrest	defect	maldevelopment	microcephaly	migration	southdown	proesterase	phosphorylating	metalloprotease	mistargeting
185	inert	effecls	hollowness	immobility	coitus	portal	immobility	mobt	failure	functional	pulmonary	fatigue	gigantism	achromatopsia	autosplenectomy	hyperglycinemia	complementmediated	hypertriglyceridaemia	tethers	crosstalk	crystallin
186	natives	annihilates	erectile	secrelion	headaches	retrograde	asthenia	iudeed	hereditary	amusia	articulatory	schizophrenic	sedentary	abreaction	deletion	spheroplast	isomaltose	intrathyroidal	thermolability	glut1	lysosomes
187	bites	energy	prejudicially	diversities	embarrassment	persistence	overtasked	cuspidors	rellex	defectiveness	attitudes	paralytics	homosexual	affect	reconstitution	insensitivity	monotropic	feminization	sulfatase	retrovirally	nr2b
188	virtues	assistants	maternal	dynamical	moroseness	behavior	vertebrates	endings	disturbauces	articulatory	aberration	sick	dividuals	delusions	flavones	anemia	coproporphyrinogen	mannosidase	cdk2	erbb4	metalloproteases
189	smallpox	corruptions	deposites	adverse	opposito	anzmic	deformities	offspring	speech	striae	environmental	rating	supporting	degenerations	hexosemonophosphate	cystinuric	chondrocytes	ebvinfected	reexpression	cytokinesis	rarÎ±
190	transmitted	mattor	bodyof	grossness	individuality	unfelt	insalubrity	contamination	counterfeited	pretuberculous	preventoria	paranoid	visual	endangered	genetically	tangier	hypoplasia	cytosol	opa1	hypoxiainducible	reexpression
191	growth	lacerations	tiiat	aciion	proneness	reptiles	mydriasis	dilapidation	causiug	defeets	blindness	sterilization	motivation	malnutrition	coprophagy	hypersarcosinemia	glucuronyl	microviscosity	nonreceptor	foxol	fadd
192	choroid	provent	murmurs	vision	arvest	blindness	transformation	intellectual	coutraindicated	unbalance	palate	immorality	glycosurias	andif	diathesis	noncarbohydrate	prohormones	simian	nlrp3	phagocytes	tolllike
193	law	befel	phlegmasiae	apathy	degradation	embarrassment	embarrassment	shanties	embarrassment	apraxic	weaklings	elimination	affective	overanxious	overtransfusion	methemoglobinemic	cystinotic	dhpr	dnabinding	nkx3	downregulates
194	policy	emotions	lingual	promoto	tasto	helplessness	externi	binocular	soakage	bystem	asymmetry	normal	repressions	electroactivity	disfigurement	tuftsin	plasmalogen	gpib	mastcell	p70s6	synthase
195	retina	melioration	germ	deficiencies	fragile	abrasion	discipline	asthenopia	agoraphobia	calleel	alien	employable	arrestment	rebelliousness	dysfunction	parental	xla	osteopetrosis	vegfb	merosin	beclin
196	grounded	smoke	impulso	moroseness	overtasking	heneo	pollutions	tentage	kuowu	hippus	preeox	impotence	divorce	scriously	noncarbohydrate	stoichiometrically	milieu	genetically	recombine	kiss1r	notch1
197	ossification	transfer	delects	unfelt	sympathetic	tensors	ideation	hysterical	6uch	conduction	defeets	eyesight	handicapped	overworking	function	galactosemic	cholesterogenesis	dermatosparaxis	chemotaxis	rac1	granzymes
198	capacity	keratonyxis	moroseness	unfrcquently	seizures	perverting	pollen	hemianaesthesia	explaiued	emotivity	eyesight	speech	libido	mania	psychosexual	nonhemoglobin	hexosaminidases	masking	sur1	cdk1	hydroxyglutarate
199	lesion	intervertebral	havethe	wasting	aeriform	crasis	structural	enfeebling	eyestrain	infantilism	cripples	cataract	development	decompensating	utilizable	nonspherocytic	reutilized	multichain	truncate	mistargeting	endogenous
200	wear	minor	extinction	formative	tempÃ©rament	handling	concussion	natives	aptitude	ampio	annulment	overcrowding	perverts	overambitious	ferroxidase	deficient	phosphatemia	hypertyrosinemia	p85	cfhr3	p70s6
