# Supplementary material for: Insights from full-text analyses of the Journal of the American Medical Association and the New England Journal of Medicine
Source: eLife. 2022 Jul 7;11:e72602. doi: 10.7554/eLife.72602 (PMC9262397; doi:10.7554/eLife.72602)
Supplement: Supplementary file 9. [file elife-72602-supp9.xlsx]

## Sheet: eTable_8_race_JAMA
	1880-1889	1890-1899	1900-1909	1910-1919	1920-1929	1930-1939	1940-1949	1950-1959	1960-1969	1970-1979	1980-1989	1990-1999	2000-2009	2010-2019
1	happiness	offspring	negro	community	races	sex	sex	sex	sex	sex	sex	ethnicity	ethnicity	ethnicity
2	offspring	peoples	human	sex	native	races	nationality	ethnic	nationality	age	ethnic	sex	sex	sex
3	intellectual	happiness	ancestry	negro	peoples	ancestry	geographic	ancestry	ethnic	marital	marital	gender	gender	hispanic
4	fetichism	african	mankind	social	ancestry	ethnic	creed	nationality	geographic	nativity	gender	marital	ethnic	age
5	religion	ancestry	hereditary	human	dominant	jews	nativity	nativity	marital	ethnic	ethnicity	age	status	marital
6	brutes	hybrid	peoples	moral	recessive	nationality	marital	negroid	nativity	religion	age	status	selfidentified	status
7	populations	instinct	uncivilized	hereditary	sex	hereditary	negro	marital	geography	birthdate	religion	nicity	hispanic	origin
8	tenderest	esquimaux	degeneracy	offspring	populations	intermarriage	happiness	mating	age	smoking	hispanic	selfidentified	age	selfidentified
9	morals	religion	zoophilism	socinl	community	family	indians	temperament	habits	sociceconomic	characteristics	hispanie	sociodemographic	asian
10	gambling	mankind	races	eugenies	interbreeding	tabus	age	geographic	religion	distribution	sociceconomic	hispanic	marital	demographics
11	uncivilized	proneness	jews	poverty	deterioration	heredity	urbanization	distribution	distribution	marathoners	stratifiers	stratifiers	socioeconomic	ethnic
12	barbarian	youth	offspring	happiness	negro	intellectual	natives	negro	economic	marriage	nicity	ethnic	black	characteristics
13	resistless	life	civilization	habits	intermarriage	peoples	native	age	birthdate	status	nativity	africanamerican	racial	badjusted
14	fathers	intellectual	savagery	living	uncivilized	geographic	economic	populations	climate	characteristics	birthdate	sociceconomic	stratifiers	black
15	rearing	species	social	mental	trait	religion	hereditary	genetic	height	groups	hispanie	urbanicity	cadjusted	cadjusted
16	gladness	human	community	peoples	natives	homosexuality	predisposition	habits	creed	fftp	distribution	religion	characteristics	mexican
17	hostility	mongolian	indians	intellectual	population	racial	sibling	characteristics	sociceconomic	class	status	urbanization	male	covariates
18	heathen	posterity	semicivilized	hygiene	offspring	offspring	recipients	athletes	urbanization	sexrace	black	adjjusted	nicity	comorbidities
19	walketh	savagery	decadence	species	life	americans	youth	races	status	social	sexand	parity	african	sociodemographic
20	baal	negro	intellectual	soil	inbred	economic	jews	gestational	ethnicity	prepregnant	selfidentified	sociodemographic	africanamerican	dincludes
21	poverty	populations	predisposition	degeneracy	social	climate	racial	religion	events	height	nonwhite	ethnie	demographics	geography
22	uncleanness	uncivilized	hottentot	mankind	scandinavians	environmental	religion	ethnie	men	ethnicity	cadjusted	sexand	badjusted	multiracial
23	celibates	ancestors	brutes	insanity	characteristics	mongolians	parental	geographical	sherpas	finalists	socioeconomie	cadjusted	religion	cincludes
24	christendom	poverty	extinction	certnin	extinction	miscegenation	equality	creed	sexuality	female	sociodemographic	1excludes	ethnicityt	male
25	israelites	cultured	deterioration	development	innate	euthenics	immigrants	dynastic	gestational	athietes	ethnicityt	characteristics	acholi	paternal
26	devastations	athlete	happiness	rural	soil	genetics	geography	birth	outbred	mbw	intraracial	nonhispanic	geography	native
27	peoples	community	monogamy	science	primitive	hamitic	migrants	fijian	social	men	1excludes	hispanies	nonhispanic	geographic
28	licentiousness	extinction	savages	commercinl	creoles	marriage	habits	racial	racial	overweight	nonblack	socioeconomie	multiracial	minorities
29	haply	brutes	intermarriage	criminals	jews	eugenic	inherited	groups	jamaicans	weight	demographics	nonblack	sociceconomic	white
30	civilize	resistless	americans	female	hamitic	intellectuality	genetic	dizygotic	spouses	nicity	atfirst	asian	asian	gender
31	degradation	jews	asiatics	mating	youth	interbreeding	male	kickball	smoking	analysis	ypll	racespecific	white	stratifiers
32	hottentot	intellectually	climate	races	zoophilism	recessive	fijians	hereditary	temperament	checkers	mswm	ancestries	geographic	female
33	beauty	heathen	species	life	intellectuality	extinction	overweight	emigrants	nubile	nationality	hispanies	imlications	nativity	acholi
34	arabs	prehuman	natives	venerenl	americans	hottentot	family	nilotic	groups	geography	adjustment	differencesin	variable	cdata
35	profligacy	barbarian	morals	climate	economic	political	miscegenation	gender	marriage	atfirst	nationality	adjjusting	female	islander
36	blighting	moral	moral	problem	intellectual	ethnologic	population	polynesian	religious	stratifiers	ageand	anglos	acculturation	waitlisting
37	instinct	athletes	pessimism	economic	hottentot	disparity	mongolians	inherited	political	cigarette	raceand	ageand	adjustment	nonhispanic
38	holiest	progenitor	world	deterioration	birth	habits	ethnic	monozygotic	aging	crosscountry	fftp	racial	origin	ancestry
39	begetting	hottentot	tropies	alcoholism	sedentary	urbanization	populations	imlications	cooped	discrimination	psap	covariables	disaggregating	self
40	scythians	zoophilism	intellectuality	religion	individuality	aryan	marriage	status	sdas	ercent	male	ancestry	islander	parental
41	piteous	primitive	pervasive	civilization	indians	mediterranean	intermarriage	literacy	socioeconomic	male	blacks	nonwhite	ancestries	bmi
42	serfdom	parent	miscegenation	youth	dominance	asiatics	distribution	caucasian	paternal	sedentary	groups	ethnicityt	nonwhite	nonwhite
43	innate	morals	evolution	industrinl	arabs	inherited	offspring	economic	mating	ageand	africanamerican	raceand	raceand	cmodel
44	alsculapius	transmissible	cultured	cconomic	gregariousness	genetic	couples	natives	couples	schizoid	laotians	badjusted	ancestry	2adjusted
45	terrors	sexuality	economic	marringe	prehuman	sexual	divorce	ethnicity	dropouts	road	racespecific	adjjustment	predisplacement	gestational
46	ferocity	savages	instinets	sexual	urbanization	indians	asio	religious	eurasian	cioeconomic	youth	socioeconomic	covariates	unknown
47	clergy	arabs	esquimaux	eduention	religion	religious	ameng	phenotype	birth	the	prepregnant	allmodels	ethnicities	alaska
48	parent	pastoral	life	vitality	wild	populations	castes	occupation	ancestry	obp	imlications	coresidence	native	bdata
49	paternal	inherited	posterity	indians	criminalistic	familial	races	genetically	influence	postmenarcheal	parental	tadjusted	hispanie	aadjusted
50	intermarried	climate	religion	love	natural	dominant	americans	stratifiers	sportswomen	gestational	mbw	oforigin	urbanicity	adjustment
51	gifted	cycle	serfdom	malarin	parents	slavic	fijian	migrants	seasonal	imlications	gestational	multiracial	2adjusted	region
52	hindoos	creoles	intellectually	sanitation	seafaring	mulattoes	religious	prestreptomycin	femininity	sexmatched	parity	africanamericans	parity	african
53	polygamous	meanest	hottentots	population	dysgenic	kickball	fathers	marriage	birthplace	cholesterol	sexrace	intraracial	palestinians	20092010
54	godly	parental	weaklings	hookworm	syrians	living	pensionable	recessive	caucasoid	socioeconomic	birthrates	nativity	imlications	urbanization
55	trammels	fantee	creoles	weaklings	living	fijian	mestizos	interbreeding	weather	habits	socioeconomic	inequality	fatalismo	indians
56	saracens	degeneracy	eurasians	individunl	pampas	social	criminals	selfidentified	agegroup	behaviors	seropositivity	birthrates	trafficked	ethnicities
57	parental	rescue	mating	industrial	ethnic	infertility	trait	jews	hawaiians	mexican	urbanicity	nonminorities	hispanics	dadjusted
58	plundered	weaklings	extinetion	natural	eurasians	characteristics	mulattoes	icelanders	character	ultramarathon	gravidity	acholi	ethnoracial	allmodels
59	desolating	intermarriage	brahmins	parental	slavic	scandinavians	polynesian	navaho	survivorship	nonrunners	victimizations	agesex	colonialism	ddefined
60	brahmins	indigenous	singhalese	nutrition	proletariat	dysgenic	marriageable	couples	season	trail	hispanics	cioeconomic	differencesin	originb
61	cultured	evolution	polynesians	euthenics	miscegenation	prehuman	discrimination	polynesians	fathers	black	nonhispanic	birthdate	socioeconomie	subtype
62	bloodthirsty	serfdom	hindoos	resistance	fathers	uncivilized	interbreeding	environmental	hispanos	dadjusted	cohabitating	islander	sexspecific	bthe
63	humbler	innate	poverty	inherited	environmental	creoles	negroes	season	dynastic	gender	overalland	white	poverty	socioeconomic
64	negro	preÃ©minent	descendants	world	tabus	gregariousness	homosexual	sexrace	imlications	64year	tstandardized	groupsin	allmodels	comorbidity
65	blights	israelites	turopean	edueation	religious	vegetarians	arabs	olympiads	methuselah	geographic	mexican	latinos	selfperceived	nonunderrepresented
66	thraldom	intellectuality	evil	bodily	hindoos	polynesian	intermarried	climate	stratifiers	paternal	oforigin	atfirst	disparity	bmli
67	debasement	habits	sex	cortain	moral	intermixture	poverty	trait	selection	genetic	nonfirearm	ofage	oforigin	ethnicityt
68	griefs	sex	civilized	male	athletes	pyknic	asiatics	sibling	64year	birth	white	submodel	aadjusted	variable
69	brutalizing	degradation	youth	campuign	inbreeding	fijians	sharecroppers	geography	naskapi	season	men	african	sociodemographics	demographicinformation
70	intermarry	transfigured	mulattoes	crime	mulattoes	adult	ethnie	citizen	competitive	sociodemographic	siws	waitlisting	disparities	cfor
71	meanest	humbler	forbears	parents	species	asio	birthdate	miscegenation	youth	attrition	bbw	pdm	masculinity	retained
72	bipeds	indians	eugenies	educational	white	primitive	political	hamitic	mbw	metoposcopy	relative	negro	cmodel	parity
73	insolence	forbears	vegetarians	spenk	climate	europeans	attitudes	intermarriage	atfirst	sherpas	ofbirth	demographies	birthdate	stratified
74	ennoble	blighting	syphilization	instinct	teutons	youth	caucasian	eurasians	characteristics	severity	height	cmodel	bmli	eprp
75	expeuse	pessimism	heathen	classifiention	nomads	criminalistic	mestizo	mestizo	maternal	agesex	ykd	terciles	postcensal	20082
76	depraved	mammal	crime	prostitution	mental	schizoid	birth	jamaicans	the	relative	hopis	higherincome	africanamericans	nicity
77	potentates	adolescent	ideality	situntion	geographic	anthropology	familics	natural	prepregnant	bbw	nonvasectomized	mswm	cioeconomic	sexand
78	prattle	migratory	immunity	cugenies	difierent	bohemians	malayans	prematurity	pipe	polygons	srrs	1bmi	nulliparity	ddata
79	shame	fittest	eivilization	adult	lithuanians	chromosomes	samoans	esscntial	sexrace	dressendorfer	treference	dispari	stratifying	residential
80	simpletons	fathers	fantee	savagery	supermen	paleolithic	brazilians	64year	unexpected	martinis	ethnie	hispanics	geocoding	clncludes
81	ravished	begetting	sport	sexunl	physical	nilotic	respecter	pleistocene	severity	quetelet	iufm	condomuse	nonmodifiable	ethnoracial
82	inheritors	littleness	civilizing	suicide	decline	natural	rejection	men	polynesian	nonsmokers	origin	consumerist	widowhood	adjusted
83	sedentary	trammels	prehuman	evolution	domesticity	habitat	creoles	nonaccident	athletes	ofcigarette	demographic	ethnoracial	yadjusted	smoking
84	domesticity	rearing	fijians	natives	color	germanic	imlications	class	kickball	temperament	agesex	differencesinthe	education	amongall
85	tribesmen	civilizing	intermarrying	enre	roumanians	fecundity	temperament	influence	populations	pastimes	purgers	sexrace	nonblack	nfhs
86	sentimentalism	gladness	economy	personality	chromosomes	female	caste	hutterites	nonsmokers	youth	differencesin	demographics	maternal	bincludes
87	spartans	beauty	europeans	intelligence	famine	mestizo	hispanie	suburbanization	class	selection	fathers	covariates	dispari	waist
88	waywardness	world	wishers	pathogenic	parasite	adolescent	seafaring	chromosomal	dizygotic	freestyle	gsws	adjustment	parental	disaggregating
89	knavery	aspirations	susceptibility	mentally	vital	ethnical	nativeborn	surnames	prejudice	influence	adjjusting	matemal	covariables	cohabitating
90	monarchies	descendants	instinct	heredity	family	native	spouses	athlete	indians	hdlcholesterol	allmodels	usborn	socioemotional	maternal
91	irreclaimable	conquerors	peasantry	health	growth	european	hamitic	hindustan	poverty	pmee	habits	amongall	ethnie	bfor
92	semites	trees	transmissible	ancestry	mongolians	hindoos	female	piebald	mentors	population	negro	characterisics	subsite	unadjusted
93	zoophilism	natives	populations	speeinl	development	anthropologic	piebald	israelis	widow	tmean	papagos	covary	nonunderrepresented	demographicand
94	thievish	whales	arabs	politieal	hereditary	hottentots	mexicans	nonracial	color	pill	migrants	table4	oversamples	sociodemographics
95	soberness	ferocity	gregariousness	marriage	adult	zoophilism	seasonal	human	statistics	socioeconomie	undetermined	genders	premigration	cmhs
96	animalism	loneliness	gencration	fathers	human	human	dominant	neolithic	aquanauts	yrt	distributions	collegeeducated	transactional	flemengho
97	worships	creature	blighting	earth	intermixture	spouses	mongolian	intermarried	occupation	adjustment	e911	ofblack	variables	20042005
98	licentious	ennoble	mussulman	eradication	healthy	intermarried	peoples	gene	nilotic	nondiscriminating	cohabiting	variable	marginalization	hyperlipidemia
99	dominant	noblest	scourge	campnign	saxons	homosexual	oceupation	birthdate	mestizo	behavior	adjusting	subcohorts	sexand	ancestries
100	strumpet	instinets	decimating	decline	instinct	negro	status	marriageable	grandparents	data	dadjusted	mmep	laveist	imlications
101	nomad	civilization	vitality	european	cossacks	rural	dependency	malayans	finalists	badminton	ofage	nsfg	anglos	characteristicsa
102	motherly	fetichism	seafaring	inefliciency	suicide	ethnie	rejectable	agegroup	genetic	kickball	islander	2adjusted	arabs	urbanicity
103	betide	haply	education	defeetives	genetically	separatism	survivors	political	remarriage	laterality	strata	withrespect	disenfranchisement	9the
104	benighted	races	barbarians	progress	bohemians	biovular	euthanasia	native	nicity	bmli	nonminorities	parental	intraracial	specialty
105	persecutions	morale	scandinavians	vital	african	enzygotic	severity	youth	female	cadjusted	badjusted	length	nisp	subgroups
106	panic	intelligence	celibates	physical	frailty	sibling	jamaicans	pensionable	black	sdas	tadjusted	tstandardized	class	bpmt
107	ptolemies	pigmies	transfigured	family	europeans	lithuanians	mulatto	mestizos	extraverted	change	smoking	maternal	dincludes	height
108	babylonians	colonists	native	grent	group	aryans	kickball	transvestites	polynesians	sopho	kickball	minhang	racespecific	rxrisk
109	community	semicivilized	insanity	clusses	brazilians	sthenic	occupation	biovular	metoposcopy	24year	birth	multivariate	latinos	confounders
110	journeyings	spartans	habits	ego	the	ainu	siblings	hottentot	death	marathons	adjjusted	gestational	pashtun	20072
111	dethrone	exclusiveness	indigenous	infunt	savagery	nativity	height	tabus	living	sibling	death	victimizations	americans	recode
112	esquimaux	habitat	colonists	intemperance	kickball	behavior	dysgenic	male	pedestrians	respect	degreegranting	prevaence	cohabitating	demographic
113	chivalrous	crime	parental	primitive	albinism	civilizations	individuality	mutation	smoke	nonathlete	athietes	nonunderrepresented	rurality	chorioamnionitis
114	indigenous	mammals	fetichism	nmong	nationality	castes	malnutrition	competitive	triplets	preteen	variable	geographic	nonashkenazi	postdiagnosis
115	unfertile	pigmy	quackery	neuropathic	animal	trait	personality	ancestries	equality	negro	weight	variationin	insurance	scrn
116	dwarfish	beneficence	intemperance	intermarriage	malayans	predisposition	intelligence	caucasoid	dadjusted	runner	nonrecent	univariate	datais	bnot
117	barbarians	acadians	begetting	dementin	chimpanzees	difierent	exotic	life	greatgrandfather	down	geography	cohabiting	interaction	interaction
118	exorcised	mohammedanism	scxual	organism	intelligence	chromosome	sharecropper	noronic	obesity	jamaicans	ptd	countylevel	originb	subhazard
119	intellectuality	vegetarians	bovine	zoophilism	irishmen	subspecies	white	trimodal	secretor	sexand	cioeconomic	ofschool	higherincome	non
120	semicivilized	emancipation	alcoholism	individunls	ethnologic	syrians	noncivilized	sephardi	happiness	peoples	treferent	minnesotans	self	pcsa
121	despotic	licentiousness	peculiaritics	public	happiness	transfigured	tabus	castes	grandstand	motivation	drugusing	socioemotional	confounders	massindex
122	transfigured	enlightment	inherited	turopean	cockroaches	slavonic	favoured	triplets	event	treference	ancestry	tlogistic	colonialists	distribution
123	albinism	intermarried	living	insunity	kraals	semicivilized	hottentot	previewing	quadruplets	freeways	adjjustment	sociodemographics	demographic	cindicates
124	pigmies	glorious	iteelf	posterity	adolescent	male	environmental	prepregnant	fijian	arabs	adjusted	cfrs	dadjusted	hypertension
125	habits	hottentots	survivors	tenching	vegetarians	criminals	hispanies	sociceconomic	ageand	hate	1total	mexicanamerican	1bmi	onself
126	pauperizes	destinies	furopeans	incorrigibles	type	cosmogony	nilotic	somatologic	sexand	young	continuers	nonmarried	blackwhite	65y
127	preÃ©minence	extinetion	leredity	eivilization	melanesians	inheritances	polynesians	childship	overweight	weightfor	eohort	ethnicities	sexism	jhs
128	uncurbed	syphilization	victims	nuture	women	civilization	childhood	sport	nonwhite	living	spouses	cohabitating	postmigration	micropolitan
129	jews	americans	zulus	eampaign	season	population	tamils	anatomic	morals	papagos	covariables	cubanamerican	unknown	disparity
130	bravest	hindoos	intelligence	insect	nomad	seasonal	syrians	social	trimodal	yearsof	snowboard	cpsm	hispanies	aqc
131	bastions	wildness	intermarried	jews	intermarried	geography	diabetes	determiners	psychological	allmodels	2adjusted	ofyoung	covary	badjus
132	blessedness	virulence	barbarism	scienee	mating	mongolian	grandparents	copulation	bridegroom	polygon	suicide	stratifying	amale	1bmi
133	vilest	animalism	mental	edueated	polynesian	imlications	recessive	fijians	slimmed	death	severity	ofchildren	sbook	covariables
134	sodom	domesticity	truth	investigntion	mortality	scxual	halfbreeds	adult	cigar	populations	dispari	sexadjusted	thematic	bindicates
135	fantee	exotic	criminals	lnck	bodily	natives	mexiean	postmen	selfidentified	tarahumara	fds	acgs	fadjusted	proxy
136	reproductive	music	chivalrous	geographic	hottentots	ailored	untouchables	fathers	americans	achievement	nonrespondent	discounting	taoism	cvrfs
137	african	achievement	prehistorie	tropies	icelanders	rearing	ancestry	prehuman	hispanie	1bmi	indians	genderrelated	demographicinformation	individuallevel
138	worshipped	brutalizing	germ	morals	organism	determiners	bohemians	aleut	hutterites	tstandardized	nonmarried	demographicand	nonparents	1excludes
139	distempers	holiest	conntry	sanitary	mussulman	grandparents	statures	samoans	person	regatta	intentionality	amongwomen	minorities	cioeconomic
140	instinetive	lethargy	ttalians	decadence	and	arabs	parents	height	natural	distributions	body	ofdiabetes	icelanders	multivariateadjusted
141	wrathful	celibates	couples	cdueation	bengalis	gualities	scandinavians	amazons	parents	indians	racet	blackwhite	cfor	subkebeles
142	pigmy	brahmins	marriage	economy	castes	semitic	stratifiers	mediterranean	idenity	racial	postservice	geography	samesex	rurality
143	braggart	reproductive	profounder	semicivilized	eugenists	mohammedans	unknown	genealogies	cadjusted	ltpas	racial	ptd	camaigns	continent
144	unchaste	dwarfish	paternal	poor	netherlanders	seafaring	group	attrition	reproductive	singles	inequality	dadjusted	interethnic	histology
145	moloch	alien	love	proteetion	ascendants	mexican	color	impairments	unrelated	nonpurgers	sidr	amale	waitlisting	characterisics
146	wild	mulattoes	barbarian	inheritanee	habitation	healthy	caucasoid	significance	geographical	sprints	marathoners	scah	multivariateadjusted	asample
147	civilizing	chivalrous	licentiousness	individnal	depopulating	morals	nonrelief	female	olympiads	horses	centiles	cfor	idenity	groups
148	harpies	fellowmen	malayans	disense	civilization	meteorologie	neurotic	unscramble	occupations	normoadrenergic	specific	smoking	inequality	natives
149	imperiling	altruism	industrial	education	huns	aborigines	ecological	favoured	unfittest	rowers	multiracial	forthose	sengoopta	stratifying
150	syphilization	benevolence	meanest	evil	carnivorous	eurasians	intermarry	unsympathetically	sharing	women	marriage	facors	racism	seasonality
151	noblest	intermarry	exterminated	descendants	greenlanders	hindustan	idenity	dwarfish	races	body	poverty	ysg	blacks	2for
152	melancholies	nobler	type	host	emotions	eavironmental	esquimaux	socioeconomic	cigarette	sportswomen	sexspecific	tobaccouse	deconstructing	demograph
153	deficiencies	victims	megro	acquired	mad	persian	palest	courtship	love	triglyceride	mortaiity	srrs	rearing	rsrr
154	mountebank	depopulating	edueated	wmong	bulgarians	heritages	freemen	personalitics	earth	methuselah	demographicand	ebcbs	courtship	pednss
155	fiercest	sharks	ravages	requive	male	leptosomatic	surnames	extramarital	abo	vouth	victims	strata	yoruba	sociodemographically
156	intermarrying	monarchs	mohammedans	men	jamaicans	micmac	intermixture	preexperimental	tational	eycling	preprogram	nonrefugees	sexadjusted	nisp
157	barrenness	fruitage	abstemious	apprecintion	celibates	conditionality	supermen	oceupation	travel	badjusted	crosscountry	nisp	sexualities	lmic
158	grandparents	simian	upholders	epilepsy	mice	saxons	susceptibility	commingle	sedentary	ofweight	female	womenin	recode	participantsin
159	acadians	dissipations	spenk	infant	men	akikuyu	groups	indians	negro	onset	islanders	variablesin	nonminorities	orientation
160	penance	eivilization	dethrone	financinl	couniries	siblings	persons	group	subjects	ethnie	deferrable	nonpoverty	consumerist	aanhpi
161	ideality	cockfighting	religious	age	bushmen	temperament	childship	knowns	hippies	pme	nonunderrepresented	female	collegeeducated	preference
162	devours	habitation	gualities	hope	pastoral	individuality	orphanhood	caste	formative	halftime	coresidence	bned	amongall	cohortin
163	decimate	strains	missionaries	cnuse	descendants	personality	chromosomal	family	puritanical	femininity	maternal	surnames	muhajiria	yadjusted
164	endogamy	loftiness	hoast	defeetive	prehistorie	marital	submarginal	selection	arabs	narcissism	prevaence	onage	funerary	aall
165	betokening	peasantry	effeminacy	characteristics	broods	mutation	adolescent	micronesians	rearing	attributes	toage	sexspecific	1excludes	history
166	aristocrats	barbarians	teutons	physienl	civilized	love	leredity	sexual	supermen	personality	nulliparity	fatalismo	bangladeshis	hispanie
167	healeth	christendom	fellowmen	idens	marriage	intelligence	hispanos	oviposition	synonymity	purgers	saudis	disaggregating	caribbeans	vasqip
168	ritually	bohemians	supermen	immunity	persons	paternal	circumecised	nonmining	family	noncontingent	bmli	lowerincome	nonrefugees	nonrefractive
169	princesses	marriage	ancestors	political	female	groups	inheritances	person	pastimes	desegregated	stratifying	sbook	inreal	cbased
170	wellwishers	intellects	humbler	venereal	furopeans	caucasian	hushands	hispanos	proneness	eating	genderrelated	overalland	agesex	variables
171	scorning	enslaved	cugenies	weal	mohammedans	sephardic	birthplace	chromatin	rouÃ©	subsets	equality	ohsup	diabetes	alncludes
172	consolations	fiercest	instinetive	buf	asiatics	psychotechnic	nubile	nicity	freeways	preexperimental	1bmi	1other	maoist	athere
173	altars	inflictions	parent	prevention	germinates	pleistocene	hardier	ethnoracial	extraterrestrial	menarche	usborn	nulliparity	crosscutting	selfreported
174	robed	virile	saxons	charncter	groups	dwarfish	obesity	character	workmates	diabetes	1other	nonmonogamous	filc	sibling
175	loftiness	patriarchs	shiftlessness	intellectuality	homeless	prehistorie	insect	hispanie	micronesians	mossyrock	nonmatched	fsws	cohortin	bidities
176	impious	hecatombs	insanitation	birth	hybrid	learning	birthplaces	smokers	pygmies	urbanites	subhazard	oversamples	parasuicide	anumbers
177	beastly	social	pigmy	publie	fascists	netherlanders	authoritarianism	ashkenazic	courtship	obesity	menand	samesex	badjus	thatincluded
178	inherited	marital	vertebrate	bovine	furopean	civilized	citizen	normans	passover	nuns	ofblack	nonmodifiable	counterfactual	oversamples
179	endangered	broods	achievement	susceptibility	paleolithic	characterology	hindoos	population	ethnoracial	events	alien	native	fds	cathpci
180	chiefest	fructifying	hindustan	uncivilized	decadent	simian	fertilities	ainu	statures	nonclaimants	finalists	idenity	ageand	nondiabetes
181	godmother	grandest	dissipations	transmissible	food	adaptation	familial	chromosomes	nonphenylketonuric	trimodal	ylls	education	trajectory	subsite
182	stoics	occupations	voodooism	inscets	birds	babylonia	aleut	leredity	horses	e911	rohingya	ahcccs	contextual	nonsmokers
183	hecatombs	hereditary	animalism	statistics	mestizo	yaws	hindustan	cooped	eertificates	hispanos	unhelmeted	centiles	nonreligious	highestamong
184	upbraid	thrones	soil	comparative	euthenics	warlike	person	pilots	nonliterate	weightt	moonlighted	collÃ©gial	whcra	mcbs
185	devastates	bloodthirsty	celestials	henlth	pleistocene	moral	attrition	mesomorph	parturient	gravidity	nfh	ratesin	marginality	prediagnosis
186	exultation	gencration	mentally	malaria	age	sedentary	pampas	melanesian	tia	cohabitating	postneonates	apncu	homophobia	higherincome
187	pestilences	economy	hamitic	enthusinsm	mentalities	eugenists	parentage	scandinavians	birthplaces	fencers	terciles	nonhispanics	bdata	cigar
188	weaklings	peer	family	native	forbears	babylonians	gualities	rouÃ©	fftp	emotions	artners	courtship	oudshoorn	pendÃ©
189	brutish	grandparents	nagana	gregariousness	masculinity	nudism	greenlanders	subindexes	adjustment	dolphin	homosexuality	sociodemographically	nonborder	condomuse
190	peasantry	enjoyments	hybrid	edueational	scythians	poverty	aryan	weather	data	grandstand	nonmetro	paternal	birthrates	africanamerican
191	religious	interbreeding	zoophiles	grenter	cannibal	men	cosmogony	amatory	nonaccident	partners	variables	subhazard	tadjusted	dropouts
192	entailment	souled	eripple	preventive	migration	bengalis	intellectuality	diabetic	urbanicity	treferent	population	bmli	ofschool	multivariable
193	malayans	esquimau	foreigner	sprend	prediabetic	teutons	minors	sexually	elapidae	dbps	amongall	faroese	comorbidities	centiles
194	heroines	ethnic	barcones	cume	frequents	literacy	prognosis	44year	prematurity	vatues	unknown	adgs	disproportion	onage
195	betoken	artistic	castes	incrense	decadence	descendants	sweethearts	occupations	desegregated	group	originb	otherrisk	aanhpi	rsrrs
196	thrive	antivaccinists	mohammedanism	government	temperament	genotypical	blindness	umique	glamorized	ysu	nonhispanics	amatched	alignments	cips
197	hades	worketh	incorrigibles	lifc	carpathian	milieu	zoophilism	hellenistic	sexual	intrapair	cumulative	noncoverage	racially	overalland
198	ferociously	aberrations	intermarry	practienl	anopheles	esquimaux	commumity	orphanhood	onset	lifestyle	sociodemographics	pairings	nonafrican	analysisa
199	hermits	psalmist	dwarfish	citizen	jewish	healthiness	the	growth	bereavement	middleweight	ethnoracial	forall	cincludes	pregestational
200	ungovernable	decimate	incalculably	temperament	behavior	parents	kraals	peoples	beclouding	hypertension	weightt	topopulation	culural	nonmedicare
