# Supplementary material for: Insights from full-text analyses of the Journal of the American Medical Association and the New England Journal of Medicine
Source: eLife. 2022 Jul 7;11:e72602. doi: 10.7554/eLife.72602 (PMC9262397; doi:10.7554/eLife.72602)
Supplement: Supplementary file 10. [file elife-72602-supp10.xlsx]

## Sheet: race
	1810-1819	1820-1829	1830-1839	1840-1849	1850-1859	1860-1869	1870-1879	1880-1889	1890-1899	1900-1909	1910-1919	1920-1929	1930-1939	1940-1949	1950-1959	1960-1969	1970-1979	1980-1989	1990-1999	2000-2009	2010-2019
1	characteristics	happiness	plumage	world	happiness	offspring	morals	peoples	negro	jews	negro	happiness	jews	sex	sex	sex	sex	sex	ethnic	ethnic	ethnic
2	conformity	quackery	debauched	savages	degradation	organism	religion	anglosaxon	beauty	offspring	extinction	peoples	religion	climate	marital	ethnic	ethnic	ethnic	sex	sex	sex
3	offspring	littleness	morals	tartars	love	parent	poverty	uncivilized	youth	youth	peoples	jews	negro	adolescent	nationality	religion	religion	age	ethnicity	hispanic	hispanic
4	sexual	ardour	tartars	offspring	cultivators	jewish	happiness	savagery	ancestry	peoples	uncivilized	achievement	races	trait	ethnic	nationality	marital	sociocconomic	marital	ethnicity	ethnicity
5	volition	social	monkey	barbarian	yearnings	anglosaxon	instinct	offspring	social	intellectual	civilization	religion	populations	genetic	nativity	marital	nationality	urbanization	hispanic	nonblack	asian
6	chain	morals	ourang	peasantry	human	germ	youth	religion	ape	barbarian	religion	habitat	dominant	environmental	religion	paternal	marriage	tadjusted	sociodemographic	marital	female
7	vitality	scythians	esteems	attitude	morals	poverty	offspring	syphilized	humau	weaklings	weaklings	americans	patriarchal	religion	scx	spouses	habits	gender	nonblack	nonwhite	marital
8	canine	gulling	cultivators	morals	religion	religion	conflict	debauched	natives	uncivilized	anglosaxon	youth	inherited	creed	distribution	status	sociocconomic	scx	parity	black	self
9	uncertainty	love	peasantry	victims	worshipper	disbelievers	fathers	warlike	peoples	learning	innate	poverty	jewish	divorce	trait	nuns	nativity	ethnicity	sociocconomic	status	male
10	galen	benevolent	offspring	esquimaux	youth	instinct	economy	negro	sports	love	mating	intellectual	anglosaxon	status	porulation	partners	minorities	marital	nonwhite	nonhispanic	status
11	reality	bewitching	happiness	cultivators	poverty	jews	anglosaxon	peasantry	intellectual	destroyers	primitive	virtues	instinct	intelligence	creed	habits	ethnicity	hispanic	socioeconomic	sociodemographic	nonblack
12	conditions	discipline	hindoos	natives	instinct	panic	conscience	bestial	gifted	moral	saxons	civilizing	idiot	geography	populations	institutionalized	age	racespecific	black	asian	ancestry
13	maintenance	teaching	scythians	criminals	perfectibility	happiness	political	bravest	morals	proletariat	syrians	anglosaxon	youth	inherited	jews	marriage	height	nonurban	racial	outbred	nonhispanic
14	dentition	offspring	gifted	hindoos	frail	imagination	parent	jews	sport	cultured	mulattoes	uncivilized	americans	nationality	status	distribution	occupations	nonblack	nonhispanic	nonurban	geographic
15	stress	satirized	esquimaux	christendom	transcendant	emotions	subserviency	weaklings	sex	domestic	persians	avorld	urbanization	jews	cthnic	grandparents	poverty	minorities	cthnic	racial	age
16	development	tippling	littleness	african	disbelievers	barbarian	sin	esquimaux	development	aggregation	scandinavians	offspring	nationality	respecter	marriage	fathers	scx	gravidity	gravidity	cthnic	black
17	display	temperance	innate	famine	heathen	mammals	indians	humau	mussulmans	inarch	offspring	creeds	peoples	temperament	negro	age	gravidity	status	nationality	parity	native
18	victims	haiiy	beauty	idolatry	shame	quackery	littleness	savages	pleistocene	americans	warlike	instinct	climate	dependency	population	sibling	gender	sociodemographic	status	age	height
19	activity	apostolic	disbelievers	votaries	intellectual	extinction	immigrants	sex	anglosaxon	intelligence	equality	sedentary	thrive	contraception	mourant	nativity	geographic	nonwhite	geography	smoking	white
20	deformity	criminal	excelling	heathen	sensuality	deterioration	imagination	effeminacy	races	community	ethnic	indians	uncivilized	nativity	aleut	ancestry	birthplace	adjustment	scx	adjustment	gender
21	events	courage	arabs	innate	gifted	tartars	jews	peopled	skeleton	shepherds	intermarriages	weaklings	nomadic	youth	sociocconomic	height	nonurban	cthnic	nonurban	covariates	multiracial
22	virus	execrations	benevolence	jews	brutes	sensuality	intellectual	geniuses	athletes	savagery	savages	morals	indigenous	adaptation	age	sociocconomic	cthnic	parental	age	gravidity	minorities
23	infantum	dunces	empedocles	blind	discipline	pernicious	beauty	herding	human	achievement	races	fathers	sedentary	geographic	ancestry	family	status	parity	adjustment	multiracial	sociodemographic
24	pathologists	beauty	luxuriance	scythians	subserviency	antipathies	conventionalities	worshipper	druids	happiness	recessive	attributes	creeds	identity	characteristics	overweight	paternal	sexmatched	racespecific	sociocconomic	latino
25	perception	rage	peaceable	defenceless	antipathies	fathers	alliance	poverty	nomad	anglosaxon	intellectual	aristocracy	inborn	populations	orf	couples	fathers	adiusted	gender	cigarettesmoking	nonwhite
26	galvanic	responsibility	bewitching	mulattoes	benevolence	depravity	degradation	excelling	religious	japanese	jews	inherited	intellectual	peoples	offspring	gestational	birthplaces	height	religion	male	il28b
27	susceptibility	relishing	hobgoblins	slays	debauched	esteems	religious	teuton	stalwart	reward	barbarian	individuality	moslem	partners	moslems	season	tadjusted	religion	hispanics	socioeconomic	islander
28	insects	worshipper	subserviency	subserviency	innate	littleness	indigenous	geologically	rejoices	world	herding	primitive	syrians	primates	respecter	menarcheal	zip	geographic	rearing	white	performance
29	signal	famous	clergy	aspirations	compassion	savagery	innate	fathers	womeu	chinamen	morals	eugenists	motivation	employable	gestational	dizygous	gestational	relative	activeduty	racespecific	postsecondary
30	prejudice	sufferance	agriculture	infidels	littleness	ape	natives	conventionalities	adornment	living	patriarchal	aggressive	athletosome	nomads	cavuse	offspring	nonwhite	ridits	demographic	female	adjustment
31	cotyledon	vivisector	hottentots	benevolence	political	innate	gifted	moorish	bewitching	moorish	instinct	immortals	poverty	love	religious	seasonal	racespecific	nonhispanic	nonmarital	mexican	yfs
32	premature	immoralities	brutes	plumage	gift	yearnings	learning	sapping	luxuriance	anopheles	conventionalities	benighted	buddhists	creeds	poruration	male	cigarettesmoking	tertiles	interracial	sexspecific	iqr
33	discrimination	contrition	barbarian	aquatic	hostility	conventionalities	disbelievers	defenceless	life	druids	intermarriage	druids	nationalistic	economic	peoples	birthplace	adjustment	nonminority	smoking	latino	brfss
34	identity	piratical	love	trait	sublimity	intellectual	antipathies	couutry	youuger	hebraic	dominant	political	attitudes	aging	parasite	indians	socioeconomic	youth	africanamerican	nationality	alaska
35	septic	disbelievers	licentious	knavery	manifestations	transcendant	americans	grandest	artizan	parental	human	grandest	geographic	siblings	divorce	xyy	nonrunners	nationality	tadjusted	hispanics	religion
36	defect	requite	sublimity	detestable	despot	heathen	habits	tartars	inarch	savages	civilized	patriarchal	warlike	adjustment	natives	nonsmokers	coronaryheart	geography	qmmp	nonuse	parity
37	pernicious	intrepidity	vultures	exotic	warlike	endemic	benevolence	gregarious	dryest	humau	athletes	human	homosexual	diabetics	eacu	groups	dizygotic	ageand	ageand	africanamerican	demographic
38	abuse	unreflecting	devouring	yearnings	conventionalities	brutes	licentious	ancestry	crowds	debauched	nomad	prostitution	love	alcoholics	torals	survivors	preschool	postconceptional	cigarettesmoking	nonoverweight	cigarettesmoking
39	imagination	jibes	aristocracy	saurian	peasantry	subserviency	educational	destroyers	conventionalities	luxuriance	esquimaux	beneficence	temperament	neurotic	mediterranean	mates	preferences	bisexuality	uniparous	qmmp	gravidity
40	adherence	drive	adoration	antipathies	barbarian	aristocracy	status	proclivities	saintly	ascendency	beauty	artizans	nativity	anglosaxon	bantus	propositi	grandparents	yearolds	religious	minorities	parental
41	distribution	mathematical	instinct	perishing	social	crime	excelling	druids	chinamen	farmers	fathers	altruism	civilization	population	irish	marrying	rearing	cigarettesmoking	covariates	gender	activeduty
42	products	fatalist	heathen	disbelievers	negro	beauty	sex	illimitable	beardless	natives	teuton	earth	offspring	moral	survivors	female	dizygous	adoptee	nonoverweight	islander	performancestatus
43	community	prostituted	teachers	littleness	jews	esquimaux	pugnacity	aristocracy	excelling	sedentary	hebraic	polygamy	oneness	primitive	dominance	parental	wasps	activeduty	interpregnancy	demographic	cthnic
44	virulence	services	sensuality	quackery	impudence	warlike	hottentots	seafaring	dirtiest	cannibalistic	creeds	learning	individuality	individuality	housing	populations	mormon	fathers	multiracial	activeduty	interquartile
45	performance	detestation	conventionalities	brutes	anglosaxon	sedentary	social	saintly	aristocrat	conventionalities	semitic	proletariat	scandinavians	domestic	birthplace	birthplaces	jews	statuses	zip	nonmarital	nonurban
46	reaction	chieftains	apostolic	esteems	humbugs	mulattoes	citizen	happiness	aristocracy	earth	protestants	conquerors	prostitution	personality	economic	cthnic	underenumeration	female	oversampled	kindergartners	hrrs
47	failure	guileless	loftiest	giant	policy	african	reward	soldiery	indians	primitive	economic	birds	druids	moslems	morrtality	rating	divorce	black	latino	selfreported	bmi
48	design	braving	execrations	conventionalities	beauty	religious	malaria	famine	nubians	poverty	nationality	shiftlessness	human	paternal	mating	employees	social	gestational	nonminority	statust	nonuse
49	mobility	arrogated	husbandman	fathers	offspring	delusion	integrity	yeomanry	bestial	religious	moslems	glorify	nomad	happiness	economy	geography	unwed	oversampled	understudied	charlson	nonmarital
50	shock	reward	carcases	bravest	training	victims	quackery	prostitution	destroyers	creeds	destroyers	consecration	spendthrift	marital	anavysis	marriageable	birth	socioeconomic	poverty	understudied	kindergartners
51	allied	abettors	grandest	ourang	tartars	emotion	sublimity	polygamy	athletic	blighting	betterment	perfectibility	nationalism	germ	torars	minorities	indians	demographic	homosexuality	ageand	stratified
52	flies	candour	rhinoceros	despot	hardihood	sublimity	bewitching	uninhabitable	esquimaux	licentious	degradation	intellectually	grandest	parents	dominant	preferences	creed	exsmoker	occupations	geographic	rxhcc
53	primitive	gloomily	moloch	anglosaxon	phase	hottentots	aristocracy	spendthrift	parisians	intermarriages	hawaiians	heathen	emancipation	gene	male	occupations	differentials	birthplaces	demographics	acove	africanamerican
54	law	descanted	keltic	perfectibility	unenlightened	debauched	immoralities	luxuriance	happiness	morals	arboreal	identity	pleistocene	susceptibility	stratums	decline	youth	noneligible	statust	variables	distribution
55	radiation	chanted	artizans	illimitable	knavery	love	barbarian	squatters	heathen	aspirations	pleistocene	conventionalities	andric	adult	averace	prison	menarcheal	dropouts	inequality	postsecondary	ecog
56	incomplete	deified	abodes	terrors	bewitching	workers	yearnings	populations	fords	individuality	savagery	geniuses	birds	bantus	aok	sibship	cohabitation	atrisk	surnames	yfs	wghs
57	religious	gloried	gulling	ihose	aristocracy	insects	plants	boars	emperors	habits	sex	ecclesiastics	conventionalities	syrians	anglosaxon	geographic	immigrants	nonpoor	exsmokers	oversampled	educational
58	werner	cackling	rejoices	astonishes	skeleton	frail	illimitable	rudest	mongolian	athletes	infidels	syrians	humankind	morale	senescence	men	religious	survivorship	drgscale	education	presurgery
59	instinct	supplications	perishing	happiness	nobility	aptitude	transcendant	chiefest	mouldering	ofhuman	sociologie	evil	ennobles	religious	indians	monozygous	activeduty	agestandardized	male	nonminority	noncurrent
60	diabetes	persecuting	shared	kings	discoursing	cupidity	overtasked	vivisectors	barbarian	parent	trait	upbuilding	betterment	impotence	prewar	birthdays	seasonal	nonmarital	education	scx	tid28w
61	preventive	hypocrite	worshipper	species	idolatry	luxuriance	proprieties	farmers	road	political	shiftless	moral	civilizations	intellectual	habits	creed	indonesians	testimated	height	socioeco	chads2
62	net	enmities	antipathies	rascals	mechanics	mendacity	deterioration	barbarian	earth	dispossessed	moorish	crusaders	luxuriance	host	menarcheal	scx	subcultural	sussects	blacks	educational	mexican
63	indigenous	stultified	infidels	divinities	esquimaux	shared	community	patriarchal	tallest	culex	peasantry	productiveness	domestic	natural	syrians	population	religiosity	bisexuals	kindergartners	nonblacks	smoking
64	discriminate	efficiency	savages	abodes	inherited	ourang	inherited	aptitude	pheidippides	dirtiest	paternal	intelligence	sexually	recency	elliptocytosis	intrapair	longshoremen	prostitution	selfreported	variable	oversampled
65	smoking	taciturnity	contrast	devices	barbarity	degradation	bounteous	personification	licentious	conquerors	carnivorous	ennobling	illiterates	moslem	races	nonwhite	nonimmigrant	menarcheal	specialty	continent	eastern
66	turkey	subserviency	meanest	worshipper	religious	political	grandest	virility	peopled	shiftless	proletariat	genetics	eugenists	disabled	weieht	smoking	ageand	covariates	statuses	dichotomized	sociocconomic
67	oximuriatic	equipage	shrewdness	conquerors	deterioration	blighting	apathy	downtrodden	cultured	wilderness	bedouin	gregarious	extinction	behavior	tyre	economic	white	nonoverweight	nonrespondents	bodymass	t12pr
68	errors	harrowed	kings	clergy	jewish	scythians	fascinations	worshiped	rudest	gregarious	frenchmen	economic	aryan	subcultural	equality	employable	homosexuality	tambov	adoptee	dyads	residential
69	style	policy	rudest	revolted	attitude	idolatry	panic	atavism	nile	degeneracy	tartars	uproot	complacence	characteristics	bedouin	dizygotic	racial	generalpopulation	ustf	tadjusted	waist
70	dislocations	futurity	slays	community	grandest	licentious	species	saxons	escapades	coldblooded	indians	climate	trait	bird	sibling	sexuality	female	postsecondary	opos	religion	nonoverweight
71	drug	romish	tenderest	love	dens	worshipper	agricultural	beauty	victorians	herding	emancipation	nobility	nomads	adverse	acee	negro	covariances	meen	strata	propensityscore	selfreported
72	rash	display	idolatry	artizans	arabs	rappings	fishes	crazed	jewish	dispensations	ancestry	yeomen	outnumbers	hereditary	gravidity	severity	population	donorrecipient	afro	demographics	region
73	structures	sententious	grovelling	necromancy	saintly	illimitable	phase	paganism	shepherds	pleistocene	gypsies	doetrine	population	thymicolymphaticus	climate	gravidity	adoptee	reestimated	disenrollment	sexmatched	geography
74	electric	despising	brained	hardihood	deity	bewitching	enormities	plebeian	tiloso	punishment	intermarry	civilization	cannibalistic	poverty	kuru	polygamy	ricans	statust	habits	healthstatus	psms
75	endemic	remorselessly	boars	rejoices	excelling	uncivilized	pathies	despotic	sedentary	sex	eugenists	populations	adjustment	sexual	indonesians	porulation	equality	agespecific	lesbians	performancestatus	occupations
76	minor	liturgy	conquerors	debauched	imagination	pugnacity	warlike	primitive	bedouin	productiveness	derelicts	deprivation	slavic	antisocial	moslem	equality	sedentary	sexspecific	undercounting	nonindependence	ustf
77	fermentation	magendic	dunces	humbugs	licentious	hardihood	policy	parisians	manhood	gypsies	heathen	vitality	environmental	native	fathers	racespecific	israelis	variable	prostitution	reestimated	covariates
78	birds	idolatry	cackling	transcendant	indians	sin	shame	hustling	geese	habitat	populations	defenceless	savagery	acquired	species	grandmothers	starters	hispanics	grandparents	disparity	bid28w
79	prolonged	overthrowing	immoralities	mightiest	integrity	birds	intellectually	fruitfulness	chariots	prisoners	degeneracy	subserviency	westernization	preschool	temperament	subcultural	sociodemographic	covariances	birthplaces	sexism	habc
80	defects	clamors	thibet	cats	weeds	plumage	fields	pleistocene	athenian	survivors	soil	divinities	weaklings	buddhists	americans	smokers	xyy	forgestational	educational	characteristics	dyads
81	conduct	pusillanimous	religion	bewitching	display	occult	rejoices	enjoyments	political	tillers	migration	infidels	sexuality	tribal	subcultural	mormon	surnames	homosexuality	sexmatched	prostitution	body
82	somnambulism	worshipers	warlike	hydropathy	world	overcrowding	host	filthiest	festivity	fords	moslem	gentiles	gynic	scandinavians	youth	syrians	spouses	nonmenstruating	preferences	lifeyears	gestational
83	diffuse	rapacity	defenceless	wretchedness	votaries	impulsive	heathen	celibacy	offspring	herbÃ­vora	poverty	morale	adornment	homosexuality	makeups	disparity	usfmg	smallfor	causespecific	afro	unknown
84	contrast	scurrility	hottentot	beauty	humbuggery	gypsies	prepossession	bewitching	refugees	spendthrift	plebeian	fruitfulness	collectivism	cthnic	yearof	pedestrians	menarche	porulation	asian	equalities	statust
85	complex	hypocrites	world	decencies	devotedness	defenceless	unlettered	clime	lhome	gulls	political	prejudice	recessive	familial	thalassemia	aleut	statuses	temperament	geographic	noneligible	koos4
86	fatality	harmonies	african	execrations	plumage	ancestry	jealousy	productiveness	coolie	chariots	depopulation	recipients	aggression	outnumbers	exiles	urbanization	negro	nativity	white	adjusted	gprd
87	amaurosis	prating	devotedness	fields	swine	perishing	deficiencies	divinities	primitive	springtime	pauperism	imagination	gorilla	japanese	searchlights	monozygotic	twins	birthplace	postsecondary	usualcare	afro
88	bite	unlettered	jibes	gifted	adoration	dermatologists	fickleness	wretchedness	geologically	races	debauched	intellects	hawaiians	neighborliness	domestic	consanguinity	discrimination	multiracial	israelis	self	origin
89	lamina	philoso	perfectibility	degradation	defenceless	jealousy	continent	futurity	sham	human	nationalistic	rejoices	inbreeding	crime	acke	educable	spouse	prediabetics	adiusted	rxhcc	identity
90	latent	corruptions	decencies	malignity	moloch	rottenness	prostituted	oneness	domestic	exiles	environmental	temperance	philological	sickness	scandinavians	activeduty	norms	groups	sexspecific	noncurrent	aask
91	bites	apostrophe	habitudes	crowds	criminals	rudest	luxuriance	uature	moral	social	conquerors	betterment	arboreal	quackery	outtcome	sulfasymazine	parental	dizygous	subcultural	ancestry	hrr
92	resolution	artizan	enchanting	excelling	saurian	prepossession	humbuggery	comely	sovereigns	germ	herbivore	humanitarians	civilizing	upbringing	sorting	israelis	middleclass	drgscale	yearolds	bmi	km2
93	outlet	impiety	hindoo	mussulmans	rappings	partizan	mendacity	clabs	hottentots	hohenzollern	keltic	forbears	mongolian	israelis	cigarettesmoking	autosomes	nonblack	trelative	nonuse	maternal	orientation
94	facilities	husbandman	pagans	cruelties	rapacity	perfectibility	peaceable	indigenous	ourang	quackery	slavic	innate	instinet	immigrants	preferences	intermarriages	characteristics	coronaryheart	nonrespondent	institutionalized	variable
95	collecting	style	accordant	inherited	enjoyments	economy	untrammelled	subserviency	uncivilized	hardier	intermarried	bettering	gregarious	vitality	immigrants	cigarettesmoking	orientals	ccharacteristic	stereotypes	agestandardized	nationality
96	intermediate	untarnished	frugivorous	patriarchs	decencies	partizans	nobleness	intermarried	parental	fathers	uglier	homeless	semitic	psychologic	aleuts	phenotype	nonpoor	categorics	cigarette	selfreports	incarceration
97	worm	druids	crazed	spanish	conquerors	vultures	druids	bovine	recipients	loftier	marital	conformist	natives	negro	interpersonal	cigarette	sexspecific	nonimmigrant	discrimination	inertia	mipi
98	choice	demoniac	bumble	anomalies	earth	immoralities	hardihood	barbarians	soldiery	wild	shiftlessness	agriculturists	neolithic	deviancy	homeless	torals	class	nonrunners	fathers	norms	rbans
99	foetus	host	discoursing	hydra	ihose	quadrumana	sensuality	iudeed	clime	trials	bestial	benefactors	exiles	infertility	birthplaces	ethnicity	ancestry	kindergartners	minorities	yrk	healthstatus
100	FALSE	raillery	corruptions	patentees	impiety	despotic	brutes	trampling	infidels	transmissible	exiles	teuton	vertebrates	bedouin	nonswimmers	pair	citizen	male	maldistributed	latinos	cyd14
101	positive	sus	ardour	gaols	veriest	indians	impostures	imperilled	tramp	jewish	dependency	humblest	couples	maims	preinsulin	intermarried	overweight	mexicanamerican	csha	stratification	gbrca
102	empirical	unchristian	knavery	indians	reserve	organisms	bravest	artizan	sailor	escapades	collectivism	progressiveness	upbringing	indians	mongols	noninoculated	nonminority	weight	agestandardized	nonreporting	tadjusted
103	recurrent	magnetizers	untaught	husbandman	trait	wretchedness	malignancy	shepherds	religion	natural	natives	graces	saintly	fathering	druids	nontwin	transsexualism	postneonatal	seropositivity	nondonors	cyd15
104	solitary	infatuated	demoniac	types	delusion	humbuggery	discipline	uglier	placidly	beauty	christians	hebraic	thoroughbred	motivation	westerner	ridits	climate	selfreported	spouses	covariables	tid16w
105	economy	delighting	healthiness	rappings	peaceable	grandest	ennobles	adoring	enjoyments	virulence	peopled	wreckage	hebrews	illiterates	armenians	nonuseful	couples	marriage	dyads	statuses	zip
106	fibrin	messiah	forwardness	warlike	loftiest	starvation	organism	squalid	debauched	civilizing	oneness	worshipper	mating	shiftlessness	african	irish	inseminations	asian	dichotomous	americans	ndi
107	tissues	heroines	detestation	vultures	dominant	temperance	rapacity	overtasked	nomadic	hotbed	geniuses	chivalry	avorld	immune	horses	surnames	nonconformity	birth	variable	kcps	racespecific
108	policy	hobgoblins	anglosaxon	pagans	detestation	conquerors	civilizing	sacrilege	filthiest	vivisectors	beautify	warlike	oceupations	prewar	nomadic	natives	parity	stuny	demeans	nonrespondent	urologists
109	grounded	vampires	mosi	rapacity	citizen	polygamy	uncivilized	overstrained	glutton	aristocracy	ape	idolatry	peasantry	nonconformity	diabetics	class	gfts	uniparous	wenneker	diseaserelated	wbi
110	passive	debauched	cattle	merciless	unlettered	unchangeable	deprivation	infidels	thoroughbred	mahometan	civilizations	love	religious	recipients	men	eacu	kindergartners	quadruplets	nonscreening	ancestries	napsi
111	prophylactic	career	moorish	empedocles	votary	ennobles	esteems	nobleness	gayety	tartars	briton	misfits	moslems	unknown	parental	marshallese	sftn	racial	nulliparity	csha	vabs
112	lettuce	reform	cruelties	mad	artizans	morals	deception	perishing	neanderthal	benighted	druids	disbelievers	bantus	political	grandparents	stalwarts	denturists	relativerisk	yfs	payor	understudied
113	quack	complaisance	saurian	contrast	suavity	hydropathists	unchristian	courtiers	boars	peoplo	world	soil	phobia	carcinogenesis	geese	grourp	men	cuass	covariables	justment	ssdi
114	microscopic	pagans	unlettered	sublimity	scythians	pigmies	african	harlot	sharing	rudest	spendthrift	emancipation	symbolic	weaklings	racespecific	infectibility	makeups	outfielders	nondonors	pcpc	hpfs
115	supporting	mesmerizers	astonishes	sensuality	thomsonism	taciturnity	licentiousness	hottentots	savages	event	israelites	economie	innate	human	rodent	characteristics	polygamy	centiles	relative	interracial	seropositivity
116	emotion	proficients	detestable	grandest	workers	savages	obliquities	buxom	freemen	revivification	athletosome	antivaccinationists	sibling	semitic	melanomas	behavior	rescaled	zip	healthstatus	chads2	adjusted
117	chancre	teachers	scope	hydropathists	unreflecting	civilizing	rudest	plumage	grandest	victims	civilizing	saintly	persians	immortals	sourck	rongelap	noneligible	justed	oversampling	causespecific	4498
118	control	lawgiver	quadrumana	barbarity	types	rapacity	dependence	mimais	veterans	jerseys	eugenically	servile	derelicts	sociocconomic	height	respecter	sexmatched	covariation	selfreports	presurgery	euroqol
119	capacity	uiy	lusus	aristocracy	eulogies	empedocles	reprobation	civilizing	threescore	paganism	romantically	victims	pyknic	dominant	ricans	rearing	season	multicollinearity	disparity	sexrelated	gametocytemia
120	occupations	benevolence	uncivilized	wretches	reprobation	tropical	rural	mightiest	bloom	polygamy	blighting	athletes	ofhuman	emotions	perinatal	unwed	motivational	covariables	middleclass	chicano	webbased
121	presentation	seeking	social	recognition	evil	susceptible	plant	commuuity	tartars	mussulmans	slavs	dissatisfaction	teuton	proneness	trappist	norms	natal	characteristics	suburbia	opos	abcd2
122	fumigation	decencies	unenlightened	impostures	tenderest	excelling	vivisectors	lithe	gulls	fatherland	polygamy	savagery	polygamy	marriage	neolithic	siblings	nonmarathon	exsmokers	transvestites	nonlinearity	hispanics
123	illusions	unbeliever	taciturnity	nobleness	artizan	impiety	rappings	mussulmans	inhumation	isolationism	egoistic	pagans	intellectuality	aryan	sexual	tribal	absenteeism	vomiters	rxhcc	performance	postrandomization
124	infection	community	rapacity	delusion	ascetic	crowds	attitude	stronghold	degradation	insect	hebrews	semitic	hardier	life	susceptibility	data	races	africanamerican	birthplace	justed	nqf
125	data	hoarded	slock	rudest	unsullied	weaklings	prejudice	debased	civilization	illimitable	atavism	quackery	christianity	living	fleas	postmature	nonmarital	migrants	1negative	yearolds	natives
126	choroid	sarcasms	divinities	birds	hobgoblins	saurian	rescue	unhinged	hindoos	education	hate	forebears	extraversion	contagion	flea	forbears	diflerences	msas	foreignborn	rescaled	genotypeguided
127	disorganized	punishment	pigmies	thomsonism	proprieties	overtasked	scythians	gypsies	mohammedans	higher	sapping	poavers	muslims	overprotection	grourp	indonesians	economic	grourp	noncurrent	mipi	plcom2012
128	systems	wellearned	political	seeking	luxuriance	polar	courage	antipodes	noblest	teuton	species	beauty	dispossessed	parent	geocrarhical	ricans	nondrinking	hypergeometric	spenders	hsq	yrk
129	parent	pleasantry	artizan	deity	humblest	teuton	maintenance	ourang	bachelors	grandest	helplessness	overcrowding	briton	soil	resettled	religiosity	aneuploidy	nidd	creed	indians	precontract
130	curve	espionage	yearnings	optics	clergy	isolation	mechanics	romantically	plebeian	israelites	nomadic	esquimaux	dependency	lamarckian	native	nonpaternity	primiparity	nonrespondent	muslims	covariable	nonsurgery
131	shells	revolted	teaching	splendor	prostitution	gifted	farmers	unchristian	benefactors	buddhists	syphilized	environmental	employable	dependence	casz	tadjusted	migrants	exposep	psychology	switchers	swedeheart
132	visitors	sentimentalist	messiah	participation	learning	peaceable	capital	youth	crucified	shame	neuropathic	brotherly	fruitfulness	athletosome	yeear	exiles	occupation	woomen	collinearity	il28b	nonscreening
133	witnesses	horses	turkey	youth	african	devastations	equality	barrenness	worshiped	gibbet	outnumbers	idols	mohammedans	ateleiosis	aboriginal	rural	employable	death	hospitaldischarge	spenders	unclassified
134	participate	mad	giant	accordant	wretchedness	healthiness	crowds	harems	habits	syrians	ecclesiastics	crop	stigma	warlike	chases	cigar	pica	diflerences	social	dichotomous	indians
135	putrefaction	paganism	gourmand	appertains	jealousy	ihose	seeking	envied	couditiou	sublimity	inborn	artistic	tallest	offspring	geographic	makeups	nonfarming	variablet	norms	collinearity	malpr
136	career	religion	accursed	humbuggery	infidels	irreligious	conduct	heathen	nineveh	thoroughbred	fatherland	meanest	adult	institutionalized	durration	gender	lifestyle	nonindependence	acculturation	oversampling	frailty
137	epidemics	physitians	species	brahmins	classical	imaginings	chiefest	prostituted	barefooted	instinct	chinamen	veneration	assortative	americans	human	identity	pipe	indonesians	resilience	demeans	interaction
138	smallpox	anathemas	despot	beautified	species	moral	revivification	subjugation	crazed	geologically	ancestors	equality	westerner	persians	casees	bacteriuria	noninoculated	differentials	nonwhites	stigmatizing	spiromics
139	capillaries	allured	monomaniacal	partizan	marvellousness	susceptibility	occupations	bipeds	wilderness	ennoble	gregarious	supermen	lawlessness	evil	chromosomal	genetic	educable	inseminations	nondeployed	noncoverage	tid40w
140	anomalous	excommunicated	abettors	unlettered	mesmerism	adverse	aberration	syrians	irish	coddling	filipinos	noblest	heathen	nutritional	killer	livin	preadolescents	reinterviewed	tpercentages	stereotyping	m1a
141	embarrassment	covets	Ã©lite	delusions	revolted	infidels	blighting	drudge	soil	soil	supermen	races	shiftlessness	underweights	person	fluorosis	porulation	durration	religiousness	disabilityadjusted	m1c
142	indians	veriest	rappings	vilest	rural	decencies	worshipper	victors	nobler	organism	cannibalistic	dispossessed	parental	defectiveness	incipence	the	parents	tottal	ancestry	plcom2012	intensivetreatment
143	emergency	dainties	gypsies	dirtiest	cattle	host	mimais	community	sharks	revels	social	bravest	heritages	aleut	bats	sexrelated	usfms	unadiusted	justment	donorrecipient	postmidnight
144	herpetic	inspirer	delighting	peaceable	polygamy	bounteous	nobility	proletariat	paganism	broods	damnation	savages	peopled	enslavement	survivorship	sixtyfive	tribal	presurgery	microdata	drgscale	other
145	idiopathic	eminence	humbuggery	reality	courage	iniquity	thrive	dements	liviug	dependants	aristocracy	parental	ethnographical	druids	tsutsugamushi	prewar	availuble	islander	primigravidity	vabs	tpercentages
146	dependent	acrobats	microscopic	teuton	mendacity	virtues	devotedness	aristocratic	gorbersdorf	intermarried	superstition	worshiped	creature	unconquered	siblings	homeless	stereotyping	smsa	unenrolled	packyears	e1900
147	anastomosis	abuse	debased	monkeys	punishment	world	despises	blighting	yeomen	intermarriage	ennobles	fatherhood	nilotic	tillers	birds	mulattoes	undereducated	rearing	switchers	psms	crosssectional
148	sedative	grounded	gift	partizans	esteems	bereavement	conquerors	ennobles	showman	athletic	dispossessed	natives	predatory	mosaic	mite	immigrants	uppermiddle	acee	nonconformity	catchup	discrimination
149	abandoned	plunder	partizan	sapping	vitality	barbarity	envied	paternal	hippopotamus	personification	larvae	bounteous	avhose	overweights	paients	uppermiddle	marriageable	quetelet	nonreview	cigarette	subgenotype
150	infectious	bucolic	saintly	prostituted	shrewdness	volition	vouching	brutes	hostility	peopled	rejoices	evolution	civilized	social	insects	fantasy	yrof	covariable	noneligible	weightheight	cimt
151	susceptible	outraging	barbarity	throngs	deception	sapping	yeomanry	yearnings	athlete	scandinavians	esteems	hebrews	feudal	hybrid	sick	retardates	americans	packyears	widowed	cqi	1negative
152	processes	judas	outang	moderns	working	species	artizan	predisposition	thousaud	vagabondage	buddhists	ennobles	sociologie	rebelliousness	ethnicity	grandfathers	visitors	cigarettc	stigmatizing	nonresponses	unadjusted
153	arrest	invectives	mussulmans	ecclesiastics	beneficence	stigma	partizan	despot	abodes	adornment	decimating	tyrants	immortals	language	motivation	mosaic	usmg	primigravidity	ardized	multicollinearity	values
154	deficiencies	mineralogist	pugnacity	scoundrels	depravity	terrors	cultivators	couutries	beeves	prostitution	saintly	destroyers	perfections	avocational	lithuanian	druids	oceupations	predonation	socioeco	ethn	disparity
155	sedentary	vanquishing	personification	weaklings	immoralities	maintenance	necromancy	emancipation	stallion	herbivore	unimagined	ancestry	exhibitionism	andric	intermarried	tife	heterosexuality	nonmetropolitan	actresses	undercounting	charlson
156	phenomenon	sceptre	revolted	unenlightened	economy	americans	proletariat	slays	bummer	decencies	nubians	fellowmen	saxons	remarriage	infectibility	unknown	alkaptonuria	tpercentages	mexican	fbat	scx
157	generalization	cannol	effeminate	desolating	career	prostituted	revolted	incalculably	helouan	antipodes	geographic	collectivism	agricultural	artistic	imitative	talmudists	groups	yrk	uppermiddle	unknown	qmmp
158	lesions	unspotted	gregarious	accessory	bounteous	baleful	rivalled	dervishes	spaniards	surveillance	wicked	boons	primitive	religions	noncombatant	stratums	irish	adjjusted	underreport	spirituality	characteristics
159	insect	unromantic	apparitions	compassion	apostolic	shame	populations	lazarettos	loveliest	demoralization	luxuriance	conflict	gentiles	sin	junin	remarriage	caretaking	nrtot	rescaled	geography	predesignated
160	trismus	political	prostituted	yeomanry	teaching	malaria	execrations	liviug	garrisoned	hebrews	predatory	derelicts	herding	illegitimacy	gene	sexspecific	discriminate	smoking	nativity	tertiles	cooperative
161	natives	ennoble	mouldering	shared	literati	unlettered	weaklings	adornment	threshold	chiefest	subserviency	dominant	misfits	russian	javanese	mating	assortative	denture	ridits	tpercentages	preownership
162	anatomists	blasphemous	unreflecting	mechanics	unspotted	unexplained	victims	rejoices	victors	briton	altruism	habits	tillers	twins	percentace	nonblack	reassignment	primiparity	advantaged	dasi	sexuality
163	unfavourably	covetous	melodies	moorish	cupidity	hobgoblins	unspotted	impoverish	mankind	citizen	antisocial	inborn	productiveness	absenteeism	cardiorenal	progression	intrapair	ageadjusted	ccharacteristic	maldistributed	maori
164	forest	unmingled	indians	dispensations	savages	licentiousness	despotic	dirtiest	poverty	life	individuÃ¡is	hordes	tribes	ancestry	nuns	karyotype	outcome	1uds	bisexuality	immunocompromising	treatmentgroup
165	reservoir	dependants	curses	outang	husbandman	foci	paganism	licentious	dissolute	expropriated	matrimony	protestants	extroverts	oneness	warlike	atherosclerosis	stratums	uppermiddle	youth	advantaged	median
166	wear	votary	continental	deception	hottentots	gourmand	decencies	hecatomb	dwarfish	bulgarians	glorify	muslims	descendents	miinzer	haematobium	socioeconomically	foreignborn	underenumeration	racism	nonscreening	identifiability
167	respiratory	northmen	parisians	overtasked	sedentary	peoples	iniquity	mouldering	bounteous	swiss	nationalism	antipathies	worshipper	kellehear	evolution	mimeograph	donorrecipient	demographics	usualcare	reassignment	spga
168	alliance	hohenzollern	farmers	veriest	prostituted	outbreak	sedentary	styrian	oarsmen	eugenists	hardier	moloch	infelicity	infelicity	oruer	siecus	females	subcohorts	monogamous	residential	agriculturalists
169	immersion	resurrections	seducing	malignancy	idiot	knavery	discrimination	rapacity	tramped	equality	recidivists	tartars	clannish	aggressive	spouses	gambling	drinking	adjjustment	lgbt	nonrespondents	ageand
170	skeleton	selfreliance	equipage	uncivilized	bravest	badness	tartars	fortresses	emancipation	mouldering	sailor	avhose	economic	hardiness	marriageable	nomadic	males	justment	equality	laterality	transactional
171	adjustment	hasbecome	licentiousness	despises	millerism	crowding	fruitfulness	chinamen	reptiles	bestial	licentious	religious	moorish	juvenile	ichthyosarcotoxism	yrears	syrians	unemployment	xerophthalmia	frailty	ancestries
172	tracheae	meaner	pigmy	captors	moderns	despising	carnal	hebrews	sunshiny	athenian	genetic	colonists	destinies	overmastering	forei	twins	agestandardized	epea	literacy	adiusted	pssi
173	prognosis	learning	meaner	infatuated	crowds	attributes	deceivers	maturer	wild	discipline	decimate	neighborly	mediaeval	innate	fatality	aged	trait	nonscreening	packyears	intensivetreatment	sexspecific
174	scale	wykeham	exhaustless	cattle	mormonism	thomsonism	overcrowding	depopulating	climate	semitic	yeomanry	humanity	economie	neurosis	bacteriophages	genealogies	behavior	selfidentified	earlytherapy	gestational	pcpc
175	reserve	bounteous	irreligious	hottentot	cruelties	educational	despot	unenlightened	gait	coddled	christianity	decencies	debauched	aptitude	behavior	leukemia	nomadic	rescaled	coronaryheart	serostatus	iadl
176	happiness	haughty	wretchedness	sports	dependence	pathies	love	viciousness	charncter	sexual	tsetse	devotedness	defectiveness	psychogenic	mammoplasia	young	death	grandparents	unadiusted	dichotomization	chads
177	marine	unhallowed	dogmatical	learning	debased	geologically	hydropathists	bedouin	community	soldiery	susceptibility	briton	iife	intermarriage	promine	visitors	aptitude	suburbia	underrepresentation	prescreening	ipss
178	discipline	humoral	group	hobgoblins	community	debased	benevolent	peoplo	nobility	aggressive	loneliness	apotheosis	susceptibility	age	norms	sibs	marathoners	social	covariances	treatmentgroup	propensityscore
179	farmers	carcases	proprieties	licentiousness	disinterestedness	deficiencies	taciturnity	nobility	conquerors	immigrants	infesting	athenian	ennobling	descendents	enterovirus	xxy	phenotype	mating	confounding	nonreview	watchfulwaiting
180	drive	divinities	mocking	slock	patriarchs	bestial	filthiness	begetting	dervishes	dervishes	bedouins	ascendency	creed	fascism	seex	numeer	schoolgirls	groupi	bodymass	5398	opos
181	diagnostic	revengeful	vampires	immigrants	speculators	grief	tropical	exiles	proletariat	stallion	aryan	comprehension	forebears	celibacy	feeding	nonrunners	maleness	nonmarathon	thanaverage	interaction	pancan
182	limited	philanthropically	ihose	creoles	patriarchal	boars	belligerents	menageries	bazars	clabs	alien	negro	nubians	perfectibility	tadjusted	overprotective	anglosaxon	llinesses	chicano	stratifies	ahi
183	self	infidels	beautified	wickedness	deities	paganism	overthrowing	unlettered	hoarded	fossilized	asceticism	conscience	habitat	virility	typhi	oceupations	wedlock	adoptees	variables	koos4	marginalization
184	continent	saurian	miners	moloch	compeers	arboreal	oneness	artizans	spinsters	massacres	mad	instinets	intermarriage	psychoses	sickle	nondrinking	interracial	normoinsulinemic	heterosexuality	confounding	yrbs
185	socket	nicknames	harems	fanatics	astronomy	continent	bias	immigrants	harem	depopulating	delinquencies	genetic	romantically	temperamental	nomads	assortative	coverers	distribution	reweighted	nontrial	noneligible
186	metastasis	rudest	teuton	desolation	meanest	brained	ourang	hippopotamus	slays	festivity	materialistic	emblems	trees	westerner	deatn	undergrown	malformed	overweight	selfidentified	confounders	hcpcs
187	caloric	consecration	babils	savans	parental	cultivators	behavior	fickleness	bipeds	saintly	neolithic	guileless	reform	subserviency	remarriage	voung	battered	widowed	unconfounded	stratifying	patientreported
188	cats	holiest	rascals	dogmatical	ourang	necromancy	defenceless	fatherland	cloisters	weakling	unhinged	acquisitive	heredity	wedlock	buddhists	xxxxy	sexrelated	65yr	mopel	apoli	reassignment
189	mechanics	maledictions	magnetizers	harpies	nobleness	detestation	oligarchy	throngs	hindoo	littleness	defectiveness	exiles	nobility	superlatively	grours	bedouin	identity	applicants	nonindependence	relative	sdi
190	sympathetic	conformist	infatuated	alliance	christendom	accordant	bereavement	conquerors	maturer	fortresses	nonjews	criminals	intermarriages	determiner	unconquered	clergy	inbreeding	ovver	conflates	watchfulwaiting	fdma
191	delusion	truculent	spiritualists	vivisectors	science	intermarriages	unbelievers	inarch	coachmen	rapacity	mexicans	personification	habits	reward	inrtial	adoptee	agriculturalists	9345	donorrecipient	habc	code
192	risk	thraldom	rustic	quadruped	beautified	enormities	manures	healthiness	extinction	geniuses	passeth	domestic	doetrine	dual	numeer	subiect	smsa	tbased	nonblacks	rmdq	selfidentified
193	intervention	jealousy	astronomy	group	glorify	oneness	mightiest	captors	clabs	mimais	life	buddhists	economy	nomadic	eripemiology	torars	siecus	uscrs	qutcomes	dcdd	noncoverage
194	decision	censures	bounteous	parisians	conduct	famine	sacredly	herd	strolling	oneness	grandest	citizen	grandparents	gropes	onser	sexually	whites	hmsa	birth	spondents	dards
195	instructions	vaunt	votary	hindostÃ¡n	execrations	revivification	syphilized	neighborly	madmen	thraldom	sordid	oceupations	political	global	frrom	foreignborn	ridits	reassign	proxy	meldna	nsqip
196	integrity	integrity	bosoms	parent	cackling	virulence	thraldom	jealousy	moorish	events	divinities	nationalistic	species	maleness	oarsmen	neolithic	regardiess	qutcome	reassign	ccw	usualcare
197	valley	forwardness	transcendentalism	deceivers	ennoble	asperities	savagery	coolie	veneration	sports	overweights	mediaeval	indians	communism	mongol	referents	mating	grroup	infectibility	hormonedependent	t8pr
198	malignancy	grossness	hostility	enshrouded	meanness	combat	abides	sensuous	harems	brutalizing	gentiles	paganism	moral	incestuous	typpe	covariances	preselection	regardiess	proxies	forecasted	prediabetic
199	anger	penitence	overthrowing	impudence	taciturnity	viviparous	commuuity	ignoble	saxons	surra	mohammedans	degradation	hereditary	agglutinable	adenovirus	aquatic	upbringing	afro	lifeyears	identity	miniaqlq
200	diurnal	demagogue	worshiped	taciturnity	illiberality	delusions	enjoyments	instancing	patrolman	specialization	inherited	prostituted	savages	herd	nutritional	tomale	male	dyads	batterers	ipi	primigravidity
